# Supplementary material for: Transition-metal-free synthesis of CMe2CF3-containing chroman-4-ones via decarboxylative trifluoroalkylation
Source: Royal Society of Chemistry journal article supplement (doi:10.1039/c9qo01283d), 2019-12-12

# Supporting Information

## Transition-metal-free synthesis of CMe<sub>2</sub>CF<sub>3</sub>-containing chroman-4-ones via decarboxylative trifluoroalkylation

Miao-Chang Liu,<sup>\*a,b</sup> Wei Liu,<sup>b</sup> Hua-Yue Wu,<sup>b</sup> Yun-Bing Zhou,<sup>b</sup> Qiuping Ding,<sup>\*a</sup> and Yiyuan Peng<sup>a</sup>

---

<sup>a</sup> Key Laboratory of Functional Small Organic Molecules, Ministry of Education, Jiangxi Normal University, 99  
Ziyang Road, Nanchang 330022, China. E-mail: dqpxnu@gmail.com

<sup>b</sup> College of Chemistry and Materials Engineering, Wenzhou University, Wenzhou 325035, China. E-mail:  
mcl@wzu.edu.cn

### Table of Contents

|                                           |     |
|-------------------------------------------|-----|
| 1. General Information .....              | S2  |
| 2. Experimental Procedure .....           | S3  |
| 3. The GC-MS data .....                   | S6  |
| 4. Analytical Data for All Products ..... | S7  |
| 5. NMR Spectra for All Products .....     | S19 |

## 1. General Information

Unless otherwise noted, materials were purchased from commercial suppliers and used without further purification. All the solvents were treated according to general methods. Melting points are uncorrected and recorded on Digital Melting Point Apparatus WRS-1B.  $^1\text{H}$  NMR and  $^{13}\text{C}$  NMR spectra were measured on a 500 MHz Bruker spectrometer (500 MHz for  $^1\text{H}$  and 125 MHz for  $^{13}\text{C}$ ) using  $\text{CDCl}_3$  as the solvent with tetramethylsilane (TMS) as the internal standard at room temperature. Chemical shifts are given in  $\delta$  relative to TMS, the coupling constants  $J$  are given in Hz. High-resolution mass spectra were recorded on an ESI-Q-TOF mass spectrometer. Column chromatography was performed using EM silica gel 60 (300-400 mesh).

## 2. Experimental Procedure

### General Procedure for the preparation of 3a

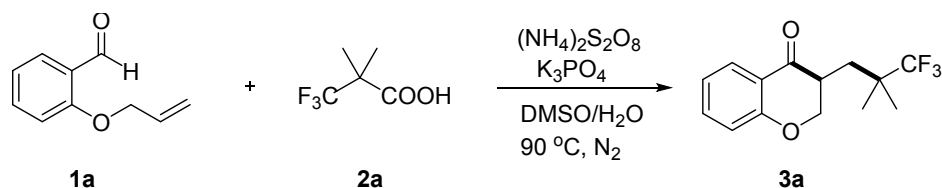

To the mixture of 3,3,3-trifluoro-2,2-dimethylpropanoic acid (0.6 mmol) and 2-(allyloxy)benzaldehyde (0.2 mmol) in a schlenk flask was added  $(\text{NH}_4)_2\text{S}_2\text{O}_8$  (0.6 mmol) and  $\text{K}_3\text{PO}_4$  (0.6 mmol) in DMSO/ $\text{H}_2\text{O}$  (v/v=2/1, 3 mL) under nitrogen atmosphere. The reaction was stirred at 90 °C for 24 h. Upon completion, the reaction mixture was concentrated under vacuum. The residue was purified by silica gel column chromatography using a petroleum ether/EtOAc (40:1-8:1) to afford the corresponding products.

### General procedure for the preparation of 1a<sup>[1]</sup>

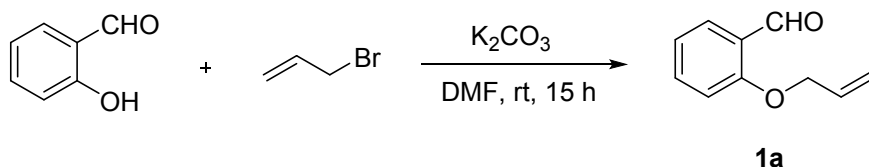

Salicylaldehyde (5 mmol) and potassium carbonate (7.5 mmol), in a 50 mL round bottomed flask was added 15 mL DMF and kept stirring at room temperature. To this stirring solution was added followed by the dropwise addition of allyl bromide (7.5 mmol). The reaction mixture was then stirred for 15 h at room temperature. Upon completion, the reaction mixture was concentrated under vacuum. The residue was purified by silica gel column chromatography using a petroleum ether/EtOAc (20:1) to afford the o-(allyloxy)benzaldehyde 1a.

#### General procedure for the preparation of **1p**<sup>[2]</sup>

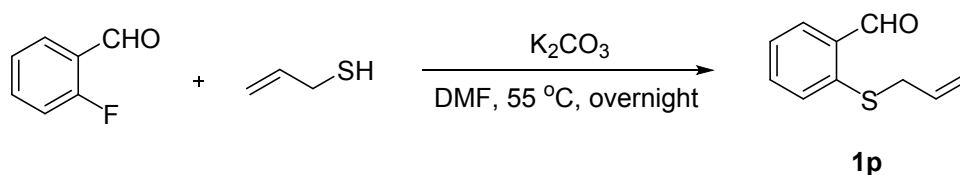

2-Fluorobenzaldehyde (5 mmol) and allyl mercaptan (10 mmol) in DMF (10 ml) were treated with potassium carbonate (10 mmol). The reaction mixture was heated to 55 °C overnight. On cooling to room temperature, the reaction was poured into water and extracted with ethyl acetate. The organic extract was washed once with water, then brine, dried ( $MgSO_4$ ) and concentrated. The residue was purified by silica gel column chromatography using a petroleum ether/EtOAc (20:1) to afford **1p**.

#### General Procedure for the preparation of **1q**<sup>[3]</sup>

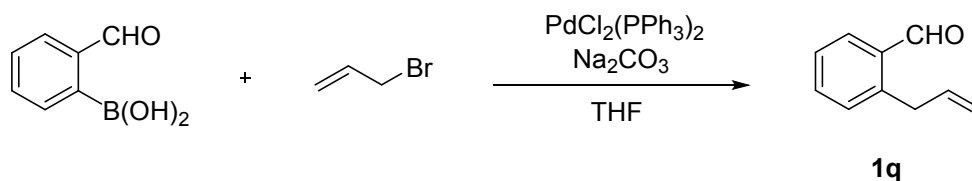

2-Formylphenylboronic acid (5 mmol) and allyl bromide (6 mmol) in THF (25 mL) in a 100 mL round-bottom flask. Then  $PdCl_2(PPh_3)_2$  (0.125 mmol) and aq.  $Na_2CO_3$  (1M, 10 mmol) solution was added. The reaction mixture was heated at reflux for 3-4 h. The reaction mixture was quenched with  $H_2O$  and extracted with  $CH_2Cl_2$  three times. The combined organic layers were washed with  $H_2O$ , dried over  $MgSO_4$ , and concentrated in vacuo. The residue was purified by silica gel column chromatography using a petroleum ether/EtOAc (30:1) to afford the desired **1q**.

#### General Procedure for the preparation of **1r**<sup>[4]</sup>

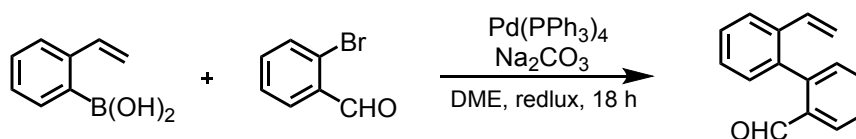

A solution of tetrakis(triphenylphosphine)palladium (0.15 mmol) and 2-bromobenzaldehyde (5 mmol) in dimethoxyethane (50 mL) was stirred 10 min at room temperature. A solution of (2-vinylphenyl)boronic acid (7.5 mmol) in ethanol (6 mL) and a solution of sodium carbonate (10 mmol) in water (6 mL) were added to the reaction mixture. After stirring 18 h under reflux and concentrated under reduced pressure. Purification with flash chromatography on silica gel using petroleum ether to afford the 2'-vinylbiphenyl-2-carbaldehyde **1r**.

#### General Procedure for the preparation of **4a**

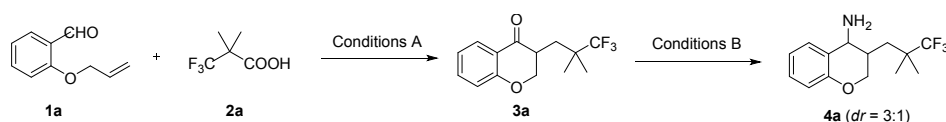

**Conditions A:** To the mixture of 3,3,3-trifluoro-2,2-dimethylpropanoic acid **2a** (0.6 mmol) and 2-(allyloxy)benzaldehyde **1a** (0.2 mmol) in a schlenk flask was added  $(\text{NH}_4)_2\text{S}_2\text{O}_8$  (0.6 mmol) and  $\text{K}_3\text{PO}_4$  (0.06 mmol) in DMSO/ $\text{H}_2\text{O}$  (v/v=2/1, 3 mL) under nitrogen atmosphere. The reaction was stirred at 90 °C for 24 h. Upon completion, the reaction mixture was concentrated under vacuum. The residue was purified by silica gel column chromatography using a petroleum ether/EtOAc (40:1) to afford the ketone **3a**; **Conditions B:** The ketone **3a** (1.0 mmol), hydroxylamine hydrochloride (1.5 mmol), ammonium formate (9 mmol) and Zn powder (3 mmol) in methanol (5 mL) was stirred under reflux overnight. After completion of the reaction the mixture was filtered through Celite and the solvent was removed by vacuum rotary evaporation. The residue was treated with conc. HCl solution (2 mL) and water (15 mL), and then extracted with diethyl ether ( $2 \times 10$  mL) to remove organic residues. The aqueous phase was alkalized with ammonia solution to pH=10 and extracted with dichloromethane ( $4 \times 25$  mL). The organic phase was washed with brine, dried over  $\text{Na}_2\text{SO}_4$  and the solvent removed under vacuum. The residue was purified by silica gel column chromatography using a petroleum ether/EtOAc (3:1) to afford **4a**.

Reference:

- [1] 1. J. Zhao, P. Li, X. Li, C. Xia and F. Li, *Chem. Commun.*, 2016, **52**, 3661. 2. A. Kuznetsov, A. Makarov, A. E. Rubtsov, A. V. Butin and V. Gevorgyan, *J. Org. Chem.*, 2013, **78**, 12144.
- [2] S. Saubern, J. M. Macdonald, J. H. Ryan, R. C. J. Woodgate, T. S. Louie, M. J. Fuchter, J. M. White and A. B. Holmes, *Tetrahedron*, 2010, **66**, 2761.
- [3] D. Vasu and R. Liu, *Chem.–Eur. J.*, 2012, **18**, 13638.
- [4] G. A. Schmid and H.-J. Borschberg, *Helv. Chim. Acta*, 2001, **84**, 388.

### 3. The GC-MS data

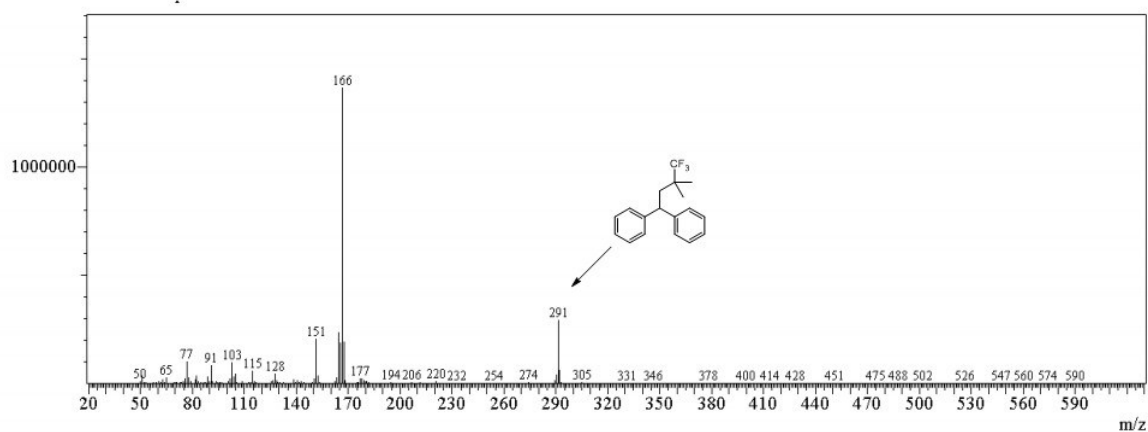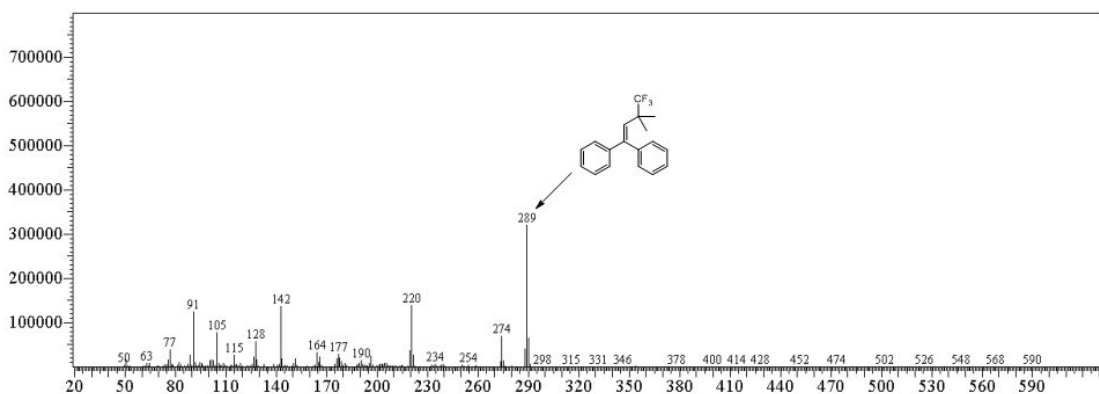

## 4. Analytical Data for All Products

Table S1. Crystal data and structure refinement for **3b**.

|                                   |                                                               |          |
|-----------------------------------|---------------------------------------------------------------|----------|
| CCDC number                       | 1965758                                                       |          |
| Empirical formula                 | C <sub>15</sub> H <sub>17</sub> F <sub>3</sub> O <sub>2</sub> |          |
| Formula weight                    | 286.28                                                        |          |
| Temperature                       | 293(2) K                                                      |          |
| Wavelength                        | 0.71073 Å                                                     |          |
| Crystal system                    | Orthorhombic                                                  |          |
| Space group                       | P b c a                                                       |          |
| Unit cell dimensions              | a = 11.693(3) Å                                               | α = 90°. |
|                                   | b = 9.266(3) Å                                                | β = 90°. |
|                                   | c = 26.611(7) Å                                               | γ = 90°. |
| Volume                            | 2883.4(13) Å <sup>3</sup>                                     |          |
| Z                                 | 8                                                             |          |
| Density (calculated)              | 1.319 Mg/m <sup>3</sup>                                       |          |
| Absorption coefficient            | 0.112 mm <sup>-1</sup>                                        |          |
| F(000)                            | 1200                                                          |          |
| Crystal size                      | 0.130 x 0.100 x 0.040 mm <sup>3</sup>                         |          |
| Theta range for data collection   | 2.907 to 24.993°.                                             |          |
| Index ranges                      | -13 ≤ h ≤ 13, -10 ≤ k ≤ 11, -31 ≤ l ≤ 30                      |          |
| Reflections collected             | 12988                                                         |          |
| Independent reflections           | 2520 [R(int) = 0.0789]                                        |          |
| Completeness to theta = 25.242°   | 96.7 %                                                        |          |
| Absorption correction             | Semi-empirical from equivalents                               |          |
| Max. and min. transmission        | 0.7453 and 0.5557                                             |          |
| Refinement method                 | Full-matrix least-squares on F <sup>2</sup>                   |          |
| Data / restraints / parameters    | 2520 / 0 / 185                                                |          |
| Goodness-of-fit on F <sup>2</sup> | 1.047                                                         |          |
| Final R indices [I > 2σ(I)]       | R1 = 0.0602, wR2 = 0.1268                                     |          |
| R indices (all data)              | R1 = 0.1277, wR2 = 0.1606                                     |          |
| Extinction coefficient            | 0.0025(6)                                                     |          |
| Largest diff. peak and hole       | 0.184 and -0.173 e.Å <sup>-3</sup>                            |          |

*(S)*-3-(3,3,3-trifluoro-2,2-dimethylpropyl)chroman-4-one

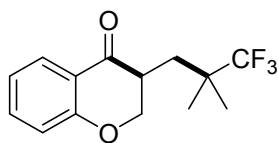

**3a**

Following the general procedure, using petroleum ether/AcOEt (40:1) as the eluant to afford colorless oil (42.4 mg, 78% yield). **<sup>1</sup>H NMR** (500 MHz, CDCl<sub>3</sub>) δ 7.90-7.89 (m, 1H), 7.50-7.46 (m, 1H), 7.04-7.01 (m, 1H), 6.97-6.96 (m, 1H), 4.52 (dd, *J* = 11.5 Hz, *J* = 5.5 Hz, 1H), 4.20-4.15 (m, 1H), 2.88-2.83 (m, 1H), 2.36 (dd, *J* = 15.0 Hz, *J* = 4.0 Hz, 1H), 1.36-1.32 (dd, *J* = 14.5 Hz, *J* = 5.0 Hz, 1H), 1.18 (s, 3H), 1.17 (s, 3H); **<sup>13</sup>C NMR** (125 MHz, DMSO-*d*<sub>6</sub>) δ 194.1, 162.0, 136.4, 129.8 (q, *J*<sub>C-F</sub> = 281.3 Hz), 128.1, 122.0, 121.0, 118.2, 71.9, 42.2, 40.5 (q, *J*<sub>C-F</sub> = 25.0 Hz), 31.2, 22.1, 20.7; **<sup>19</sup>F NMR** (470 MHz, CDCl<sub>3</sub>): δ [ppm] = -78.1. **HRMS** (ESI) calcd for C<sub>14</sub>H<sub>16</sub>F<sub>3</sub>O<sub>2</sub> [M+H]<sup>+</sup>: 273.1102, found: 273.1106.

*(S)*-7-methyl-3-(3,3,3-trifluoro-2,2-dimethylpropyl)chroman-4-one

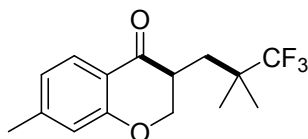

**3b**

Following the general procedure, using petroleum ether/AcOEt (40:1) as the eluant to afford white solid (39.5 mg, 69% yield), mp: 73-74 °C. **<sup>1</sup>H NMR** (500 MHz, CDCl<sub>3</sub>) δ 7.78 (d, *J* = 8.0 Hz, 1H), 6.84 (d, *J* = 8.0 Hz, 1H), 6.76 (s, 1H), 4.49 (dd, *J* = 11.0 Hz, *J* = 5.0 Hz, 1H), 4.17-4.12 (m, 1H), 2.83-2.78 (m, 1H), 2.36 (s, 3H), 2.35-2.31 (m, 1H), 1.34 (dd, *J* = 14.5 Hz, *J* = 5.0 Hz, 1H), 1.18 (s, 3H), 1.17 (s, 3H); **<sup>13</sup>C NMR** (125 MHz, CDCl<sub>3</sub>) δ 193.8, 162.0, 147.9, 130.0, 129.9 (q, *J*<sub>C-F</sub> = 281.3 Hz), 123.4, 118.8, 118.2, 71.9, 42.2, 40.55 (q, *J*<sub>C-F</sub> = 23.8 Hz), 31.2, 22.4, 22.1, 20.7; **<sup>19</sup>F NMR** (470 MHz, CDCl<sub>3</sub>): δ [ppm] = -78.0. **HRMS** (ESI) calcd for C<sub>15</sub>H<sub>17</sub>F<sub>3</sub>O<sub>2</sub>Na [M+Na]<sup>+</sup>: 309.1079, found: 309.1083.

*(S)*-6-methyl-3-(3,3,3-trifluoro-2,2-dimethylpropyl)chroman-4-one

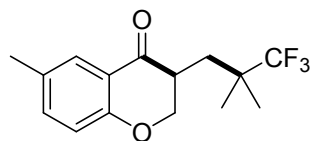

**3c**

Following the general procedure, using petroleum ether/AcOEt (40:1) as the eluant to afford colorless oil (42.9 mg, 75% yield). **<sup>1</sup>H NMR** (500 MHz, CDCl<sub>3</sub>) δ 7.66 (s, 1H), 7.29-7.27 (m, 1H), 6.86-6.84 (m, 1H), 4.48 (dd, *J* = 11.0 Hz, *J* = 5.0 Hz, 1H), 4.16-4.11 (m, 1H), 2.83-2.78 (m, 1H), 2.35-2.33 (m, 1H), 2.30 (s, 3H), 1.33 (dd, *J* = 11.0 Hz, *J* = 5.5 Hz, 1H), 1.17 (s, 3H), 1.16 (s, 3H); **<sup>13</sup>C NMR** (125 MHz, CDCl<sub>3</sub>) δ 194.4, 160.0, 137.5, 131.4, 129.8 (q, *J*<sub>C-F</sub> = 281.3 Hz), 127.6, 120.6, 118.0, 71.9, 42.3, 40.6 (q, *J*<sub>C-F</sub> = 23.8 Hz), 31.2, 22.1, 20.9, 20.7; **<sup>19</sup>F NMR** (470 MHz, CDCl<sub>3</sub>): δ [ppm] = -78.0. **HRMS** (ESI) calcd for C<sub>15</sub>H<sub>17</sub>F<sub>3</sub>O<sub>2</sub>Na [M+Na]<sup>+</sup>: 309.1079, found: 309.1083.

*(S)*-7-chloro-3-(3,3,3-trifluoro-2,2-dimethylpropyl)chroman-4-one

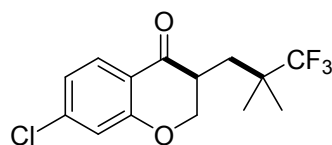

**3d**

Following the general procedure, using petroleum ether/AcOEt (40:1) as the eluant to afford white solid (40.7 mg, 66% yield), mp: 63-64 °C. **<sup>1</sup>H NMR** (500 MHz, CDCl<sub>3</sub>) δ 7.82 (d, *J* = 8.0 Hz, 1H), 7.01-7.00 (m, 2H), 4.53 (dd, *J* = 11.5 Hz, *J* = 5.0 Hz, 1H), 4.20-4.15 (m, 1H), 2.84 (m, 1H), 2.33 (dd, *J* = 11.5 Hz, *J* = 5.0 Hz, 1H), 1.34 (dd, *J* = 15.0 Hz, *J* = 5.5 Hz, 1H), 1.18 (s, 3H), 1.17 (s, 3H); **<sup>13</sup>C NMR** (125 MHz, CDCl<sub>3</sub>) δ 193.1, 162.3, 142.3, 129.8 (q, *J*<sub>C-F</sub> = 281.3 Hz), 129.3, 122.8, 119.6, 118.4, 72.1, 42.1, 40.8, 40.5 (q, *J*<sub>C-F</sub> = 25.0 Hz), 31.2, 22.2 (q, *J*<sub>C-F</sub> = 2.5 Hz), 20.7; **<sup>19</sup>F NMR** (470 MHz, CDCl<sub>3</sub>): δ [ppm] = -78.0. **HRMS** (ESI) calcd for C<sub>14</sub>H<sub>15</sub>ClF<sub>3</sub>O<sub>2</sub> [M+H]<sup>+</sup>: 307.0712, found: 307.0712.

*(S)*-7-fluoro-3-(3,3,3-trifluoro-2,2-dimethylpropyl)chroman-4-one

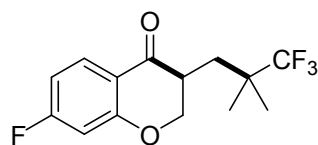

**3e**

Following the general procedure, using petroleum ether/AcOEt (40:1) as the eluant to afford yellow oil (41.8 mg, 72% yield). **<sup>1</sup>H NMR** (500 MHz, CDCl<sub>3</sub>) δ 7.93-7.89 (m, 1H), 6.76-6.73 (m, 1H), 6.66-6.64 (m, 1H), 4.54 (dd, *J* = 11.5 Hz, *J* = 5.0 Hz, 1H), 4.21-4.16 (m, 1H), 2.86-2.81 (m, 1H), 2.34 (dd, *J* = 15.0 Hz, *J* = 3.5 Hz, 1H), 1.33 (dd, *J* = 15.0 Hz, *J* = 11.5 Hz, 5.5H), 1.18 (s, 3H), 1.17 (s, 3H); **<sup>13</sup>C NMR** (125 MHz, CDCl<sub>3</sub>) δ 192.7, 167.9 (d, *J*<sub>C-F</sub> = 253.8 Hz), 163.6 (d, *J*<sub>C-F</sub> = 13.8 Hz), 130.6 (d, *J*<sub>C-F</sub> = 11.3 Hz), 129.8 (q, *J*<sub>C-F</sub> = 281.3 Hz), 118.0 (d, *J*<sub>C-F</sub> = 2.5 Hz), 110.4 (d, *J*<sub>C-F</sub> = 22.5 Hz), 105.0 (d, *J*<sub>C-F</sub> = 23.8 Hz), 72.3, 42.0, 40.52 (q, *J*<sub>C-F</sub> = 146.3 Hz), 31.2, 22.2, 20.7; **<sup>19</sup>F NMR** (470 MHz, CDCl<sub>3</sub>): δ [ppm] = -78.0, -100.7. **HRMS** (ESI) calcd for C<sub>14</sub>H<sub>14</sub>F<sub>4</sub>O<sub>2</sub>Na [M+Na]<sup>+</sup>: 313.0828, found: 313.0818.

*(S)*-6-fluoro-3-(3,3,3-trifluoro-2,2-dimethylpropyl)chroman-4-one

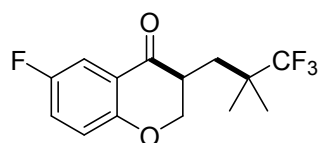

**3f**

Following the general procedure, using petroleum ether/AcOEt (40:1) as the eluant to afford yellow oil (42.3 mg, 73% yield). **<sup>1</sup>H NMR** (500 MHz, CDCl<sub>3</sub>) δ 7.55-7.53 (m, 1H), 7.22-7.18 (m, 1H), 6.96-6.94 (m, 1H), 4.52 (dd, *J* = 11.5 Hz, *J* = 5.5 Hz, 1H), 4.18-4.13 (m, 1H), 2.87-2.81 (m, 1H), 2.33 (dd, *J* = 14.5 Hz, *J* = 3.5 Hz, 1H), 1.35 (dd, *J* = 15.0 Hz, *J* = 5.5 Hz, 1H); **<sup>13</sup>C NMR** (125 MHz, CDCl<sub>3</sub>) δ 193.4, 158.2, 157.8 (d, *J*<sub>C-F</sub> = 240.0 Hz), 129.8 (q, *J*<sub>C-F</sub> = 281.3 Hz), 124.0 (d, *J*<sub>C-F</sub> = 25.0 Hz), 121.4 (d, *J*<sub>C-F</sub> = 7.5 Hz), 119.9 (d, *J*<sub>C-F</sub> = 7.5 Hz), 113.0 (d, *J*<sub>C-F</sub> = 22.5 Hz), 72.03, 42.2, 40.54 (q, *J*<sub>C-F</sub> = 23.8 Hz), 22.2 (q, *J*<sub>C-F</sub> = 2.5 Hz), 20.73 (q, *J*<sub>C-F</sub> = 2.5 Hz); **<sup>19</sup>F NMR** (470 MHz,

CDCl<sub>3</sub>):  $\delta$  [ppm] = -78.0, -121.4. **HRMS** (ESI) calcd for C<sub>14</sub>H<sub>14</sub>F<sub>4</sub>O<sub>2</sub>Na [M+Na]<sup>+</sup>: 313.0828, found: 313.0818.

*(S)*-8-fluoro-3-(3,3,3-trifluoro-2,2-dimethylpropyl)chroman-4-one

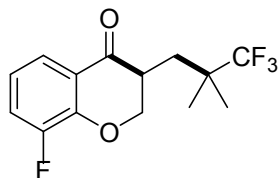

**3g**

Following the general procedure, using petroleum ether/AcOEt (40:1) as the eluant to afford yellow oil (35.4 mg, 61% yield). **<sup>1</sup>H NMR** (500 MHz, CDCl<sub>3</sub>)  $\delta$  7.68-7.66 (m, 1H), 7.31-7.27 (m, 1H), 6.99-6.94 (m, 1H), 4.64 (dd,  $J$  = 11.5 Hz,  $J$  = 5.0 Hz, 1H), 4.28-4.23 (m, 1H), 2.93-2.88 (m, 1H), 2.37 (dd,  $J$  = 15.0 Hz,  $J$  = 4.0 Hz, 1H), 1.36 (dd,  $J$  = 15.0 Hz,  $J$  = 5.0 Hz, 1H), 1.19 (s, 3H), 1.18 (s, 3H); **<sup>13</sup>C NMR** (125 MHz, CDCl<sub>3</sub>)  $\delta$  193.1, 152.0 (d,  $J_{C-F}$  = 247.5 Hz), 150.4, 150.3, 129.8 (q,  $J_{C-F}$  = 281.3 Hz), 123.2 (d,  $J_{C-F}$  = 3.8 Hz), 122.2 (d,  $J_{C-F}$  = 17.5 Hz), 121.4 (d,  $J_{C-F}$  = 6.3 Hz), 72.4, 42.3, 40.5 (q,  $J_{C-F}$  = 23.8 Hz), 31.1, 22.2, 20.8; **<sup>19</sup>F NMR** (470 MHz, CDCl<sub>3</sub>):  $\delta$  [ppm] = -78.0, -135.6. **HRMS** (ESI) calcd for C<sub>14</sub>H<sub>14</sub>F<sub>4</sub>O<sub>2</sub>Na [M+Na]<sup>+</sup>: 313.0828, found: 313.0818.

*(S)*-6-bromo-7-fluoro-3-(3,3,3-trifluoro-2,2-dimethylpropyl)chroman-4-one

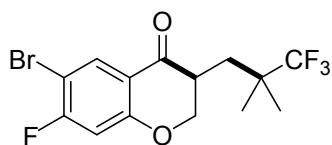

**3h**

Following the general procedure, using petroleum ether/AcOEt (40:1) as the eluant to afford yellow solid (42.7 mg, 58% yield), mp: 82-83 °C. **<sup>1</sup>H NMR** (500 MHz, CDCl<sub>3</sub>)  $\delta$  8.10-8.08 (m, 1H), 6.76-6.74 (m, 1H), 4.54 (dd,  $J$  = 11.5 Hz,  $J$  = 5.5 Hz, 1H), 4.21-4.16 (m, 1H), 2.86-2.81 (m, 1H), 2.32 (dd,  $J$  = 15.0 Hz,  $J$  = 3.5 Hz, 1H), 1.33 (dd,  $J$  = 14.5 Hz,  $J$  = 5.0 Hz, 1H), 1.17 (s, 6H); **<sup>13</sup>C NMR** (125 MHz, CDCl<sub>3</sub>)  $\delta$  191.7, 163.7 (d,  $J_{C-F}$  = 255.0 Hz), 162.5 (d,  $J_{C-F}$  = 12.5 Hz), 133.2 (d,  $J_{C-F}$  = 3.8 Hz), 129.7 (q,  $J_{C-F}$

= 281.3 Hz), 119.0 (d,  $J_{C-F}$  = 2.5 Hz), 106.4 (d,  $J_{C-F}$  = 25.0 Hz), 102.9 (d,  $J_{C-F}$  = 22.5 Hz), 72.3, 41.9, 40.5 (q,  $J_{C-F}$  = 25.0 Hz), 31.2, 22.2 (q,  $J_{C-F}$  = 2.5 Hz), 20.7;  **$^{19}\text{F}$  NMR** (470 MHz,  $\text{CDCl}_3$ ):  $\delta$  [ppm] = -77.8, -94.8. **HRMS** (ESI) calcd for  $\text{C}_{14}\text{H}_{14}\text{BrF}_4\text{O}_2$   $[\text{M}+\text{H}]^+$ : 369.0113, found: 369.0118.

*(S)*-6-methoxy-3-(3,3,3-trifluoro-2,2-dimethylpropyl)chroman-4-one

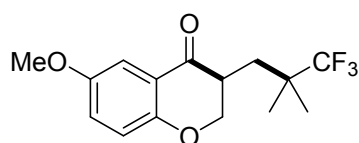

**3i**

Following the general procedure, using petroleum ether/AcOEt (40:1) as the eluant to afford colorless oil (38.7 mg, 64% yield).  **$^1\text{H}$  NMR** (500 MHz,  $\text{CDCl}_3$ )  $\delta$  7.32-7.31 (m, 1H), 7.10-7.08 (m, 1H), 6.91-6.89 (m, 1H), 4.48 (dd,  $J$  = 11.0 Hz,  $J$  = 5.0 Hz, 1H), 4.16-4.12 (m, 1H), 3.80 (s, 3H), 2.85-2.80 (m, 1H), 2.33 (dd,  $J$  = 11.0 Hz,  $J$  = 5.0 Hz, 1H), 1.37-1.18 (dd,  $J$  = 15.0 Hz,  $J$  = 5.5 Hz, 1H), 1.19 (s, 3H), 1.18 (s, 3H);  **$^{13}\text{C}$  NMR** (125 MHz,  $\text{CDCl}_3$ )  $\delta$  194.2, 156.7, 154.7, 129.8 (q,  $J_{C-F}$  = 281.3 Hz), 125.6, 120.8, 119.5, 108.6, 72.0, 56.3, 42.3, 40.6 (q,  $J_{C-F}$  = 25.0 Hz), 31.4, 22.1, 20.8;  **$^{19}\text{F}$  NMR** (470 MHz,  $\text{CDCl}_3$ ):  $\delta$  [ppm] = -78.0. **HRMS** (ESI) calcd for  $\text{C}_{15}\text{H}_{18}\text{F}_3\text{O}_3$   $[\text{M}+\text{H}]^+$ : 303.1208, found: 303.1212.

*(S)*-7-methoxy-3-(3,3,3-trifluoro-2,2-dimethylpropyl)chroman-4-one

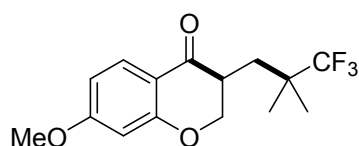

**3j**

Following the general procedure, using petroleum ether/AcOEt (40:1) as the eluant to

afford white solid (33.2 mg, 55% yield), mp: 90-91 °C. **<sup>1</sup>H NMR** (500 MHz, CDCl<sub>3</sub>) δ 7.83 (d, *J* = 8.5 Hz, 1H), 6.60-6.58 (m, 1H), 6.41-6.40 (m, 1H), 4.50 (dd, *J* = 11.5 Hz, *J* = 5.0 Hz, 1H), 4.18-4.14 (m, 1H), 3.84 (s, 3H), 2.81-2.76 (m, 1H), 2.33 (dd, *J* = 15.0 Hz, *J* = 3.5 Hz, 1H), 1.34 (dd, *J* = 15.0 Hz, *J* = 5.5 Hz, 1H), 1.18 (s, 3H), 1.17 (s, 3H); **<sup>13</sup>C NMR** (125 MHz, CDCl<sub>3</sub>) δ 192.8, 166.5, 163.9, 129.9 (q, *J*<sub>C-F</sub> = 281.3 Hz), 129.8, 114.9, 110.5, 101.1, 72.2, 56.1, 41.9, 40.55 (q, *J*<sub>C-F</sub> = 25.0 Hz), 31.3, 22.2, 20.7; **<sup>19</sup>F NMR** (470 MHz, CDCl<sub>3</sub>): δ [ppm] = -78.0. **HRMS** (ESI) calcd for C<sub>15</sub>H<sub>18</sub>F<sub>3</sub>O<sub>3</sub> [M+H]<sup>+</sup>: 303.1208, found: 303.1212.

*(S)*-6-nitro-3-(3,3,3-trifluoro-2,2-dimethylpropyl)chroman-4-one

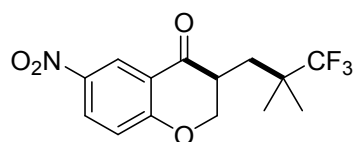

**3k**

Following the general procedure, using petroleum ether/AcOEt (8:1) as the eluant to afford yellow solid (38.7 mg, 61% yield), mp: 118-119 °C. **<sup>1</sup>H NMR** (500 MHz, CDCl<sub>3</sub>) δ 8.80-8.78 (m, 1H), 8.33 (m, *J* = 8.0 Hz, 1H), 7.12-7.10 (m, 1H), 4.66 (dd, *J* = 11.5 Hz, *J* = 5.5 Hz, 1H), 4.30-4.25 (m, 1H), 2.95-2.92 (m, 1H), 2.40-2.36 (m, 1H), 1.36 (dd, *J* = 15.0 Hz, *J* = 5.0 Hz, 1H), 1.19 (s, 6H); **<sup>13</sup>C NMR** (125 MHz, CDCl<sub>3</sub>) δ 192.0, 165.8, 142.8, 130.7, 129.7 (q, *J*<sub>C-F</sub> = 281.3 Hz), 124.7, 120.6, 119.6, 72.2, 42.0, 40.5 (q, *J*<sub>C-F</sub> = 23.8 Hz), 31.08, 22.4, 20.7; **<sup>19</sup>F NMR** (470 MHz, CDCl<sub>3</sub>): δ [ppm] = -77.8. **HRMS** (ESI) calcd for C<sub>14</sub>H<sub>14</sub>F<sub>3</sub>NO<sub>4</sub>Na [M+Na]<sup>+</sup>: 340.0773, found: 340.0771.

*(S)*-2-(3,3,3-trifluoro-2,2-dimethylpropyl)-2,3-dihydro-1H-benzo[*f*]chromen-1-one

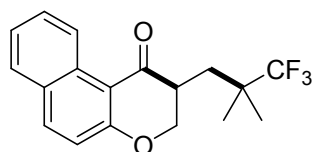

**3l**

Following the general procedure, using petroleum ether/AcOEt (40:1) as the eluant to

afford white solid (23.2 mg, 36% yield), mp: 104-105 °C. **<sup>1</sup>H NMR** (500 MHz, CDCl<sub>3</sub>) δ 9.40 (d, *J* = 9.0 Hz, 1H), 7.92 (d, *J* = 9.0 Hz, 1H), 7.75 (d *J* = 8.0 Hz, 1H), 7.64-7.61 (m, 1H), 7.44-7.41 (m, 1H), 7.08 (d, *J* = 9.0 Hz, 1H), 4.62 (dd, *J* = 11.0 Hz, *J* = 4.5 Hz, 1H), 4.33-4.29 (m, 1H), 2.93-2.88 (m, 1H), 2.39 (dd, *J* = 15.0 Hz, *J* = 4.5 Hz, 1H), 1.47 (dd, *J* = 15.0 Hz, *J* = 5.5 Hz, 1H), 1.21 (s, 3H), 1.18 (s, 3H); **<sup>13</sup>C NMR** (125 MHz, CDCl<sub>3</sub>) δ 195.3, 163.7, 137.9, 132.2, 130.1, 129.9 (q, *J*<sub>C-F</sub> = 281.3 Hz), 129.8, 129.0, 126.1, 125.4, 119.0, 112.5, 71.9, 42.8, 40.6 (q, *J*<sub>C-F</sub> = 23.8 Hz), 31.8, 22.2, 20.7; **<sup>19</sup>F NMR** (470 MHz, CDCl<sub>3</sub>): δ [ppm] = -78.0. **HRMS** (ESI) calcd for C<sub>18</sub>H<sub>18</sub>F<sub>3</sub>O<sub>2</sub> [M+H]<sup>+</sup>: 323.1259, found: 323.1259.

*(S)*-1-tosyl-3-(3,3,3-trifluoro-2,2-dimethylpropyl)-2,3-dihydroquinolin-4(1H)-one

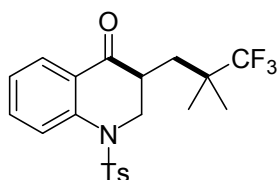

**3o**

Following the general procedure, using petroleum ether/AcOEt (40:1) as the eluant to afford yellow solid (51.0 mg, 60% yield), mp: 101-102 °C. **<sup>1</sup>H NMR** (500 MHz, CDCl<sub>3</sub>) δ 7.98-7.96 (m, 1H), 7.88-7.86 (m, 1H), 7.61-7.59 (m, 2H), 7.58-7.54 (m, 1H), 7.27-7.24 (m, 3H), 4.56 (dd, *J* = 14.0 Hz, *J* = 5.5 Hz, 1H), 3.67-3.61 (m, 1H), 2.47-2.42 (m, 1H), 2.39 (s, 3H), 2.33 (dd, *J* = 15.0 Hz, *J* = 3.0 Hz, 1H), 1.23 (dd, *J* = 14.5 Hz, *J* = 5.5 Hz, 1H), 1.11 (s, 3H), 1.09 (s, 3H); **<sup>13</sup>C NMR** (125 MHz, CDCl<sub>3</sub>) δ 195.0, 145.1, 142.8, 137.3, 135.1, 130.5, 129.7 (q, *J*<sub>C-F</sub> = 281.3 Hz), 128.9, 127.4, 125.7, 125.1, 123.7, 52.5, 42.1, 40.5 (q, *J*<sub>C-F</sub> = 25.0 Hz), 33.2, 22.0, 21.7, 21.0; **<sup>19</sup>F NMR** (470 MHz, CDCl<sub>3</sub>): δ [ppm] = -78.1. **HRMS** (ESI) calcd for C<sub>21</sub>H<sub>22</sub>F<sub>3</sub>NO<sub>3</sub>Na [M+Na]<sup>+</sup>: 448.1170, found: 448.1179.

*(R)*-2-(3,3,3-trifluoro-2,2-dimethylpropyl)-2,3-dihydro-1H-inden-1-one

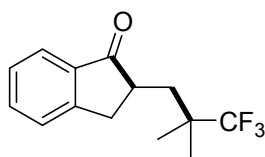

**3q**

Following the general procedure, using petroleum ether/AcOEt (40:1) as the eluant to afford colorless oil (36.9 mg, 72% yield). **<sup>1</sup>H NMR** (500 MHz, CDCl<sub>3</sub>) δ 7.77 (d, *J* = 7.5 Hz, 1H), 7.61-7.58 (m, 1H), 7.46 (d, *J* = 7.5 Hz, 1H), 7.39-7.36 (m, 1H), 3.49 (dd, *J* = 17.0 Hz, *J* = 8.0 Hz, 1H), 2.87 (dd, *J* = 17.0 Hz, *J* = 4.5 Hz, 1H), 2.68-2.64 (m, 1H), 2.37 (d, *J* = 14.5 Hz, 1H), 1.57 (dd, *J* = 14.5 Hz, *J* = 10.5 Hz, 1H), 1.23 (s, 6H); **<sup>13</sup>C NMR** (125 MHz, CDCl<sub>3</sub>) δ 208.2, 153.9, 136.5, 135.4, 129.9 (q, *J*<sub>C-F</sub> = 281.3 Hz), 128.0, 126.9, 124.5, 44.5, 40.8 (q, *J*<sub>C-F</sub> = 25.0 Hz), 38.5, 36.3, 22.3 (q, *J*<sub>C-F</sub> = 2.5 Hz), 21.5 (q, *J*<sub>C-F</sub> = 2.5 Hz); **<sup>19</sup>F NMR** (470 MHz, CDCl<sub>3</sub>): δ [ppm] = -77.6. **HRMS** (ESI) calcd for C<sub>14</sub>H<sub>15</sub>F<sub>3</sub>ONa [M+Na]<sup>+</sup>: 279.0973, found: 279.0971.

*(S)*-3-((1-(trifluoromethyl)cyclobutyl)methyl)chroman-4-one

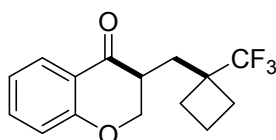

**3s**

Following the general procedure, using petroleum ether/AcOEt (40:1) as the eluant to afford colorless oil (46.0 mg, 81% yield). **<sup>1</sup>H NMR** (500 MHz, CDCl<sub>3</sub>) δ 7.91-7.89 (m, 1H), 7.49-7.46 (m, 1H), 7.04-7.01 (m, 1H), 6.97-6.95 (m, 1H), 4.53 (dd, *J* = 11.5 Hz, *J* = 5.0 Hz, 1H), 4.21-4.17 (m, 1H), 2.86-2.80 (m, 1H), 2.58-2.55 (m, 1H), 2.42-2.37 (m, 1H), 2.35-2.30 (m, 1H), 2.03-1.93 (m, 4H), 1.56-1.55 (m, 1H); **<sup>13</sup>C NMR** (125 MHz, CDCl<sub>3</sub>) δ 194.3, 162.1, 136.4, 129.4 (q, *J*<sub>C-F</sub> = 277.5 Hz), 128.1, 122.0, 120.9, 118.2, 71.2, 44.67 (q, *J*<sub>C-F</sub> = 26.3 Hz), 43.3, 30.4, 27.9 (q, *J*<sub>C-F</sub> = 3.8 Hz), 26.3 (q, *J*<sub>C-F</sub> = 2.5 Hz), 15.2; **<sup>19</sup>F NMR** (470 MHz, CDCl<sub>3</sub>): δ [ppm] = -77.0. **HRMS** (ESI) calcd for C<sub>15</sub>H<sub>15</sub>F<sub>3</sub>O<sub>2</sub>Na [M+Na]<sup>+</sup>: 307.0922, found: 307.0938.

*(S)*-7-methyl-3-((1-(trifluoromethyl)cyclobutyl)methyl)chroman-4-one

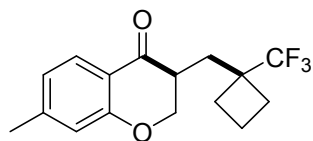

**3t**

Following the general procedure, using petroleum ether/AcOEt (40:1) as the eluant to afford colorless oil (41.7 mg, 70% yield). **<sup>1</sup>H NMR** (500 MHz, CDCl<sub>3</sub>) δ 7.79 (d, *J* = 8.0 Hz, 1H), 6.84 (d, *J* = 8.0 Hz, 1H), 6.77 (s, 1H), 4.51 (dd, *J* = 11.5 Hz, *J* = 5.0 Hz, 1H), 4.19-4.15 (m, 1H), 2.81-2.79 (m, 1H), 2.55 (dd, *J* = 15.0 Hz, *J* = 3.0 Hz, 1H), 2.41-2.30 (m, 1H), 2.36 (s, 3H), 2.03-1.95 (m, 4H), 1.61-1.55 (m, 2H); **<sup>13</sup>C NMR** (125 MHz, CDCl<sub>3</sub>) δ 194.0, 162.1, 147.9, 129.5 (q, *J*<sub>C-F</sub> = 277.5 Hz), 128.0, 123.4, 118.7, 118.2, 71.2, 44.7 (q, *J*<sub>C-F</sub> = 26.3 Hz), 43.3, 30.5, 27.9, 26.3, 22.4, 15.2; **<sup>19</sup>F NMR** (470 MHz, CDCl<sub>3</sub>): δ [ppm] = -76.7. **HRMS** (ESI) calcd for C<sub>16</sub>H<sub>17</sub>F<sub>3</sub>O<sub>2</sub>Na [M+Na]<sup>+</sup>: 321.1079, found: 321.1079.

*(S)*-6-methyl-3-((1-(trifluoromethyl)cyclobutyl)methyl)chroman-4-one

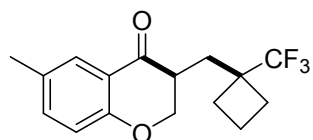

**3u**

Following the general procedure, using petroleum ether/AcOEt (40:1) as the eluant to afford colorless oil (44.1 mg, 74% yield). **<sup>1</sup>H NMR** (500 MHz, CDCl<sub>3</sub>) δ 7.69 (s, 1H), 7.29 (d, *J* = 7.0 Hz, 1H), 6.87 (d, *J* = 7.0 Hz, 1H), 4.50 (dd, *J* = 11.5 Hz, *J* = 5.0 Hz, 1H), 4.19-4.15 (m, 1H), 2.83-2.78 (m, 1H), 2.56-2.52 (m, 1H), 2.41-2.37 (m, 1H), 2.31 (s, 3H), 2.04-1.94 (m, 4H), 1.60-1.56 (m, 2H); **<sup>13</sup>C NMR** (125 MHz, CDCl<sub>3</sub>) δ 194.5, 160.1, 137.5, 131.4, 129.4 (q, *J*<sub>C-F</sub> = 277.5 Hz), 127.6, 120.5, 118.0, 71.2, 44.7 (q, *J*<sub>C-F</sub> = 26.3 Hz), 43.4, 30.5, 27.9 (q, *J* = 3.8 Hz), 26.3 (q, *J* = 3.8 Hz), 20.9, 15.2; **<sup>19</sup>F NMR** (470 MHz, CDCl<sub>3</sub>): δ [ppm] = -76.7. **HRMS** (ESI) calcd for C<sub>16</sub>H<sub>17</sub>F<sub>3</sub>O<sub>2</sub>Na [M+Na]<sup>+</sup>: 321.1079, found: 321.1079.

*(S)*-7-fluoro-3-((1-(trifluoromethyl)cyclobutyl)methyl)chroman-4-one

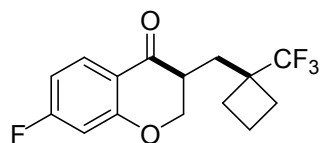

**3v**

Following the general procedure, using petroleum ether/AcOEt (40:1) as the eluant to afford colorless oil (44.1 mg, 73% yield). **<sup>1</sup>H NMR** (500 MHz, CDCl<sub>3</sub>) δ 7.94-7.91 (m, 1H), 6.77-6.73 (m, 1H), 6.67-6.64 (m, 1H), 4.56-4.53 (m, 1H), 4.23-4.19 (m, 1H), 2.84-2.79 (m, 1H), 2.57 (dd, *J* = 15.5 Hz, *J* = 4.0 Hz, 1H), 2.43-2.30 (m, 2H), 2.04-1.94 (m, 4H), 1.58-1.54 (m, 1H); **<sup>13</sup>C NMR** (125 MHz, CDCl<sub>3</sub>) δ 192.9, 167.9 (d, *J*<sub>C-F</sub> = 253.8 Hz), 163.7 (d, *J*<sub>C-F</sub> = 13.8 Hz), 130.6 (d, *J*<sub>C-F</sub> = 11.3 Hz), 129.4 (q, *J*<sub>C-F</sub> = 277.5 Hz), 117.9 (d, *J*<sub>C-F</sub> = 2.5 Hz), 110.4 (d, *J*<sub>C-F</sub> = 22.5 Hz), 105.0 (d, *J*<sub>C-F</sub> = 25.0 Hz), 71.6, 44.6 (q, *J*<sub>C-F</sub> = 26.3 Hz), 43.1, 30.3, 27.9, 26.3, 15.2; **<sup>19</sup>F NMR** (470 MHz, CDCl<sub>3</sub>): δ [ppm] = -76.7, -100.6. **HRMS** (ESI) calcd for C<sub>15</sub>H<sub>14</sub>F<sub>4</sub>O<sub>2</sub>Na [M+Na]<sup>+</sup>: 325.0828, found: 325.0860.

*(S)*-1-tosyl-3-((1-(trifluoromethyl)cyclobutyl)methyl)-2,3-dihydroquinolin-4(1H)-one

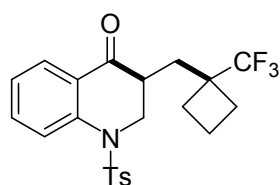

**3w**

Following the general procedure, using petroleum ether/AcOEt (10:1) as the eluant to afford yellow oil (59.4 mg, 68% yield). **<sup>1</sup>H NMR** (500 MHz, CDCl<sub>3</sub>) δ 7.97-7.89 (m, 2H), 7.56-7.54 (m, 3H), 7.26-7.20 (m, 3H), 4.61 (dd, *J* = 14.0 Hz, *J* = 5.5 Hz, 1H), 3.67-3.62 (m, 1H), 2.52 (dd, *J* = 15.5 Hz, *J* = 3.5 Hz, 1H), 2.45-2.39 (m, 2H), 2.37 (s, 3H), 2.27-2.21 (m, 1H), 2.00-1.80 (m, 4H), 1.44 (dd, *J* = 15.0 Hz, *J* = 6.0 Hz); **<sup>13</sup>C NMR** (125 MHz, CDCl<sub>3</sub>) δ 195.3, 145.0, 142.9, 137.2, 135.2, 130.4, 129.3 (q, *J*<sub>C-F</sub> =

277.5 Hz), 128.8, 127.4, 125.7, 125.2, 123.9, 52.0, 44.7 (q,  $J_{C-F}$  = 26.4 Hz), 43.0, 32.4, 27.7, 26.2, 22.0, 15.2;  **$^{19}\text{F}$  NMR** (470 MHz,  $\text{CDCl}_3$ ):  $\delta$  [ppm] = -76.8. **HRMS** (ESI) calcd for  $\text{C}_{22}\text{H}_{22}\text{F}_3\text{NO}_3\text{SNa}$   $[\text{M}+\text{Na}]^+$ : 460.1170, found: 460.1184.

*(R)*-2-((1-(trifluoromethyl)cyclobutyl)methyl)-2,3-dihydro-1H-inden-1-one

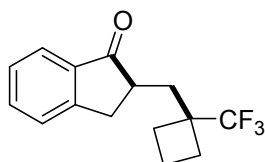

**3x**

Following the general procedure, using petroleum ether/AcOEt (40:1) as the eluant to afford colorless oil (41.2 mg, 77% yield).  **$^1\text{H}$  NMR** (500 MHz,  $\text{CDCl}_3$ )  $\delta$  7.77 (d,  $J$  = 7.5 Hz, 1H), 7.61-7.58 (m, 1H), 7.46 (d,  $J$  = 7.5 Hz, 1H), 7.39-7.36 (m, 1H), 3.48 (dd,  $J$  = 17.5 Hz,  $J$  = 8.0 Hz, 1H), 2.89 (dd,  $J$  = 17.0 Hz,  $J$  = 4.0 Hz, 1H), 2.68-2.64 (m, 1H), 2.61-2.58 (m, 1H), 2.46-2.41 (m, 1H), 2.39-2.33 (m, 1H), 2.07-2.01 (m, 4H), 1.74 (dd,  $J$  = 15.0 Hz,  $J$  = 10.0 Hz, 1H);  **$^{13}\text{C}$  NMR** (125 MHz,  $\text{CDCl}_3$ )  $\delta$  208.4, 154.2, 136.6, 135.4, 128.0, 126.9, 124.5, 45.0, 37.3, 35.5, 30.2, 27.9 (q,  $J_{C-F}$  = 3.9 Hz), 26.1, 15.3;  **$^{19}\text{F}$  NMR** (470 MHz,  $\text{CDCl}_3$ ):  $\delta$  [ppm] = -76.4. **HRMS** (ESI) calcd for  $\text{C}_{15}\text{H}_{16}\text{F}_3\text{O}$   $[\text{M}+\text{H}]^+$ : 269.1153, found: 269.1137.

*(S)*-3-((1-(trifluoromethyl)cyclopentyl)methyl)chroman-4-one

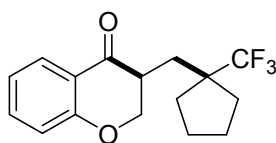

**3y**

Following the general procedure, using petroleum ether/AcOEt (40:1) as the eluant to afford colorless oil (44.7 mg, 75% yield).  **$^1\text{H}$  NMR** (400 MHz,  $\text{CDCl}_3$ )  $\delta$  7.91-7.88 (m, 1H), 7.50-7.45 (m, 1H), 7.04-7.00 (m, 1H), 6.97-6.95 (m, 1H), 4.56 (dd,  $J$  = 11.2 Hz,  $J$  = 5.2 Hz, 1H), 4.20-4.14 (m, 1H), 2.91-2.85 (m, 1H), 2.43-2.38 (m, 1H), 2.05-1.98 (m, 1H), 1.96-1.89 (m, 1H), 1.75-1.73 (m, 4H), 1.62-1.54 (m, 2H), 1.44-1.39 (m, 1H);  **$^{13}\text{C}$  NMR** (100 MHz,  $\text{CDCl}_3$ )  $\delta$  194.5, 162.1, 136.4, 130.5 (q,  $J_{C-F}$  = 280.0 Hz), 128.1,

121.9, 120.9, 118.2, 71.5, 51.06 (q,  $J_{C-F}$  = 23.0 Hz), 43.3, 34.9, 32.5, 30.9, 26.4 (d,  $J_{C-F}$  = 9.0 Hz);  **$^{19}\text{F}$  NMR** (376 MHz,  $\text{CDCl}_3$ ):  $\delta$  [ppm] = -73.5. **HRMS** (ESI) calcd for  $\text{C}_{16}\text{H}_{17}\text{F}_3\text{O}_2\text{Na}$   $[\text{M}+\text{Na}]^+$ : 321.1078, found: 321.1086.

*(3R,4S)-3-(3,3,3-trifluoro-2,2-dimethylpropyl)chroman-4-amine*

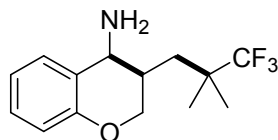

dr= 3:1

**4a**

Following the general procedure, using AcOEt as the eluant to afford yellow oil (150.1 mg, 55% yield).  **$^1\text{H}$  NMR** (500 MHz,  $\text{CDCl}_3$ )  $\delta$  7.74-7.73 (m, 1H), 7.60-7.55 (m, 2H), 7.35-7.32 (m, 1H), 3.94-3.91 (m, 2H), 3.56-3.55 (m, 1H), 2.35-2.31 (m, 1H), 2.14-2.11 (m, 1H), 1.17-1.14 (m, 1H), 1.11 (s, 3H), 0.98 (s, 3H);  **$^{13}\text{C}$  NMR** (125 MHz,  $\text{CDCl}_3$ )  $\delta$  163.8, 137.5, 130.6, 129.8 (q,  $J_{C-F}$  = 281.3 Hz), 124.1, 121.9, 110.7, 66.5, 44.1, 41.1 (q,  $J_{C-F}$  = 25.0 Hz), 36.4, 35.9, 21.9, 21.0;  **$^{19}\text{F}$  NMR** (470 MHz,  $\text{CDCl}_3$ ):  $\delta$  [ppm] = -78.2. **HRMS** (ESI) calcd for  $\text{C}_{14}\text{H}_{19}\text{F}_3\text{NO}$   $[\text{M}+\text{H}]^+$ : 274.1418, found: 274.1428.

## 5. NMR Spectra for All Products

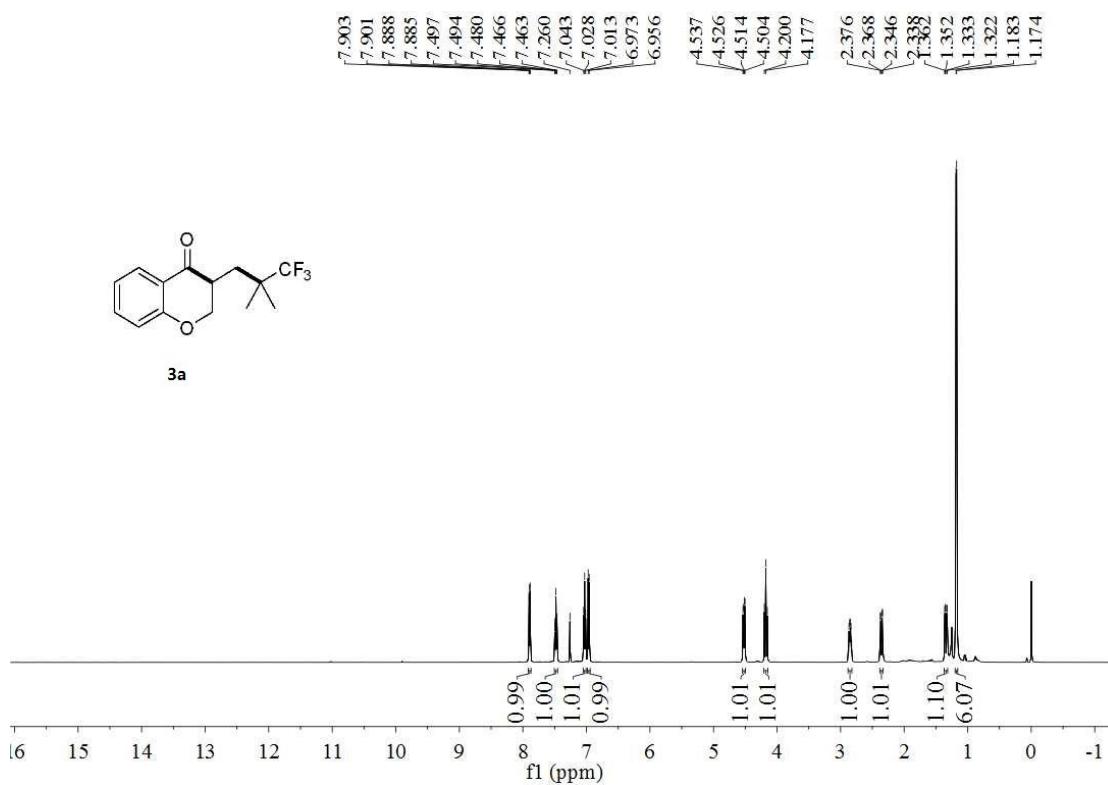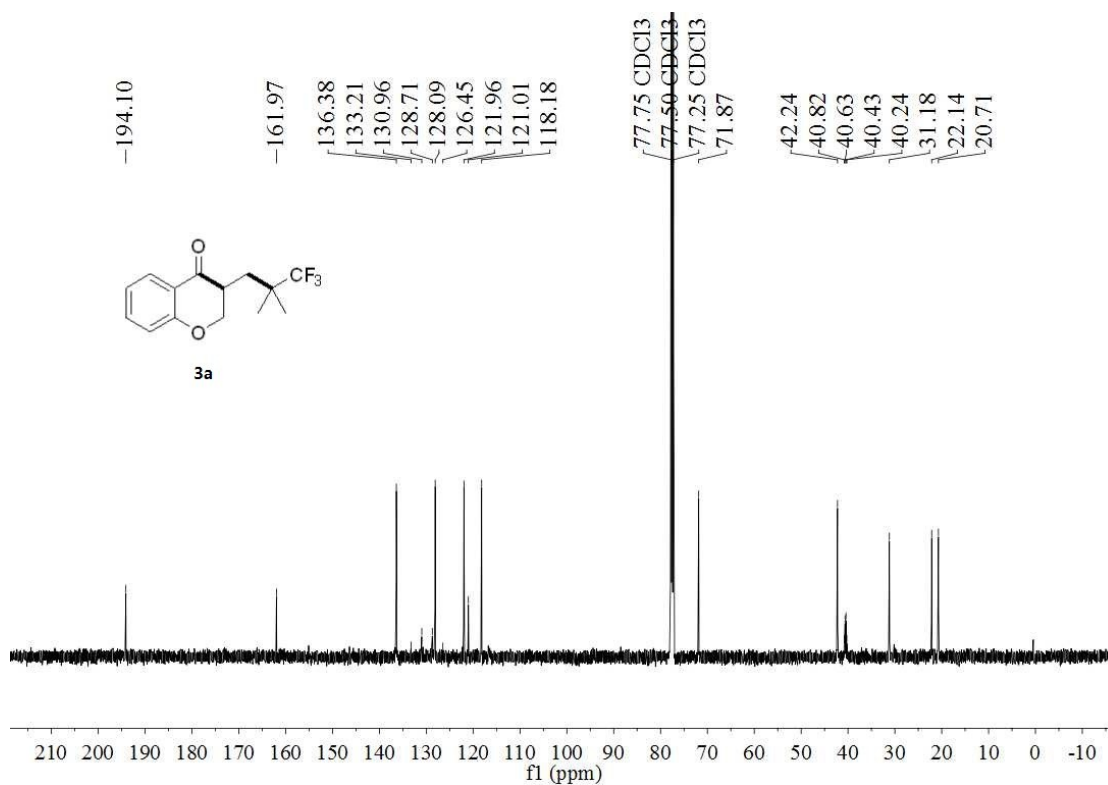

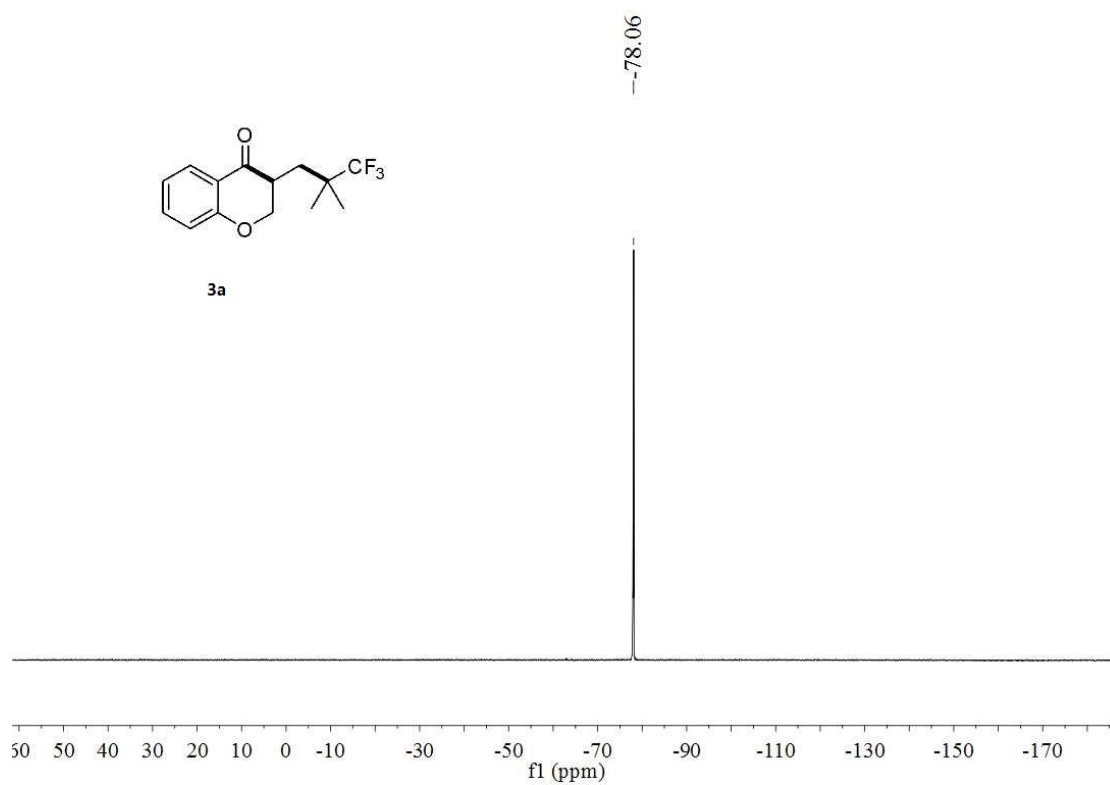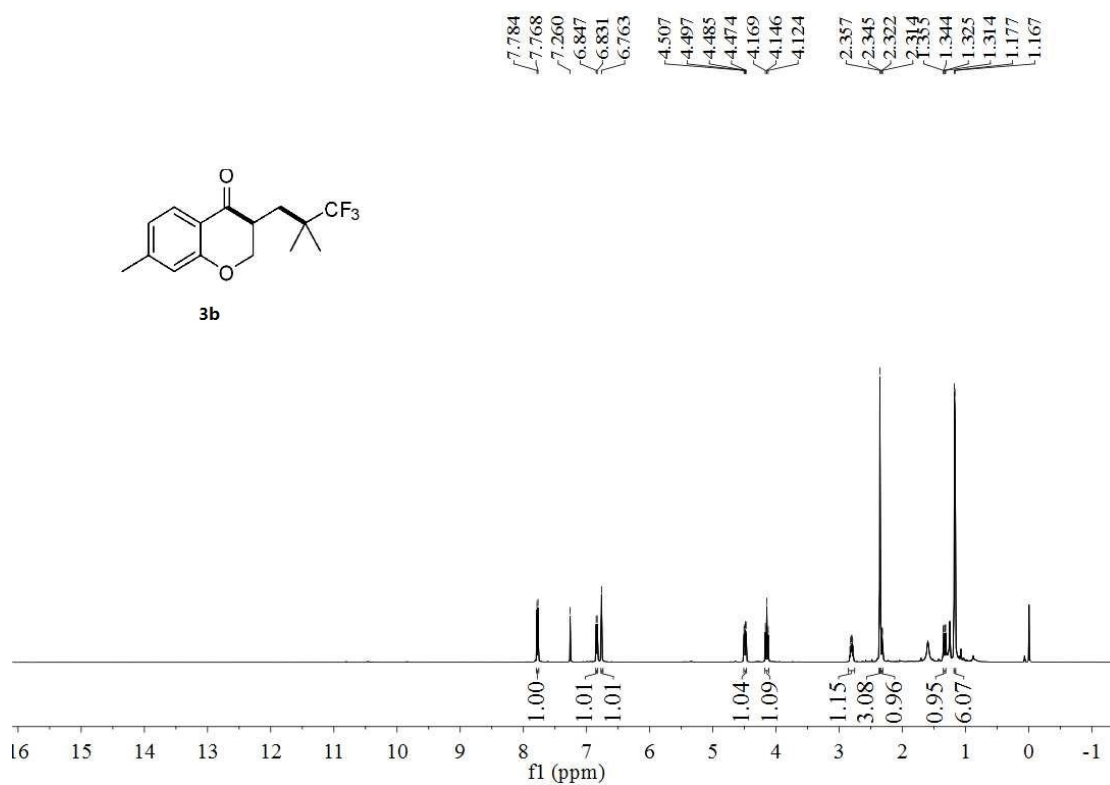

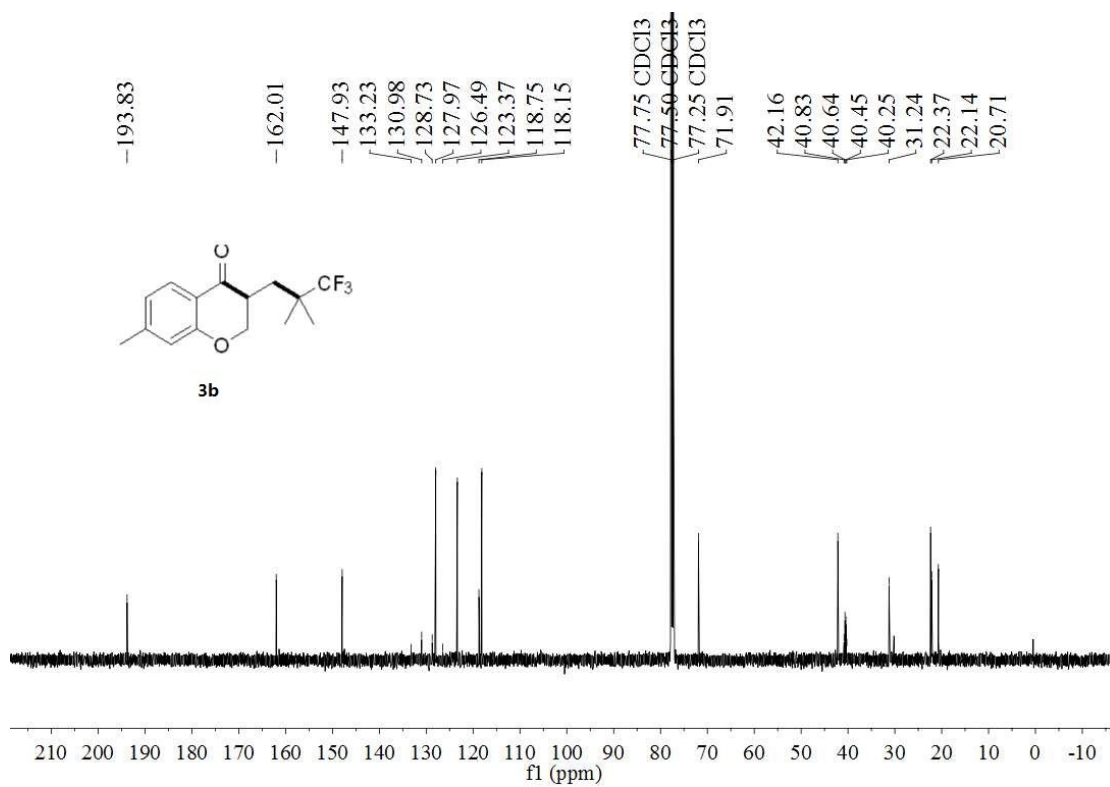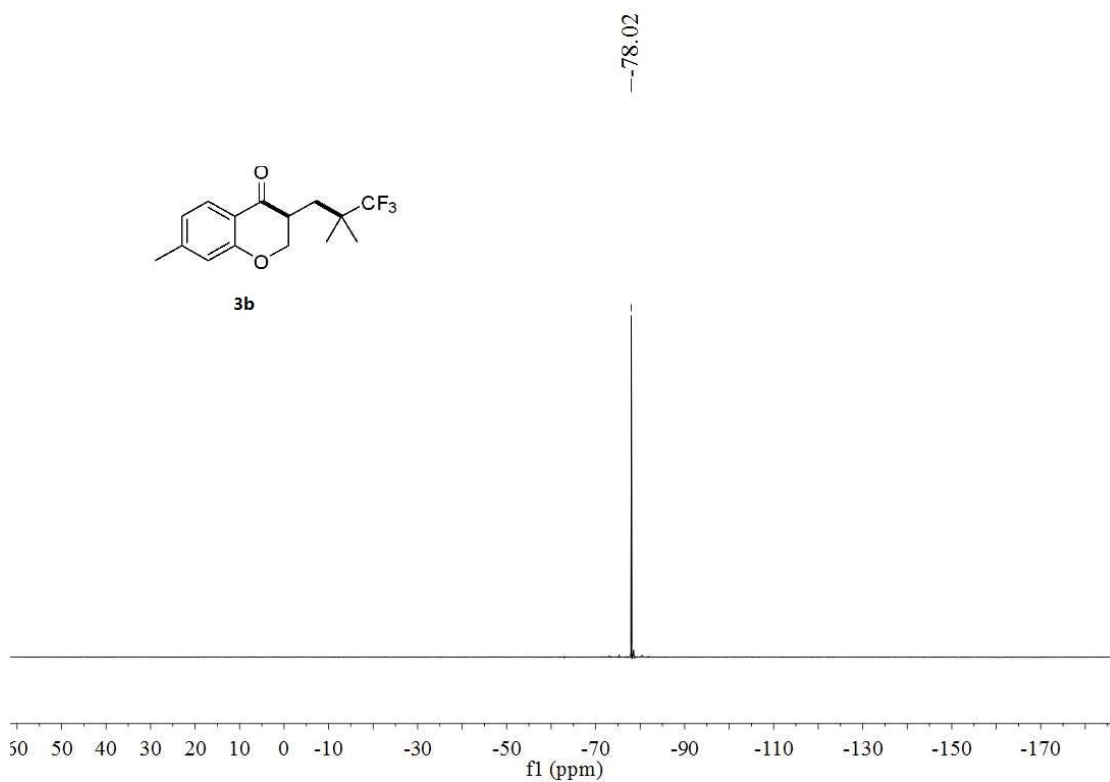

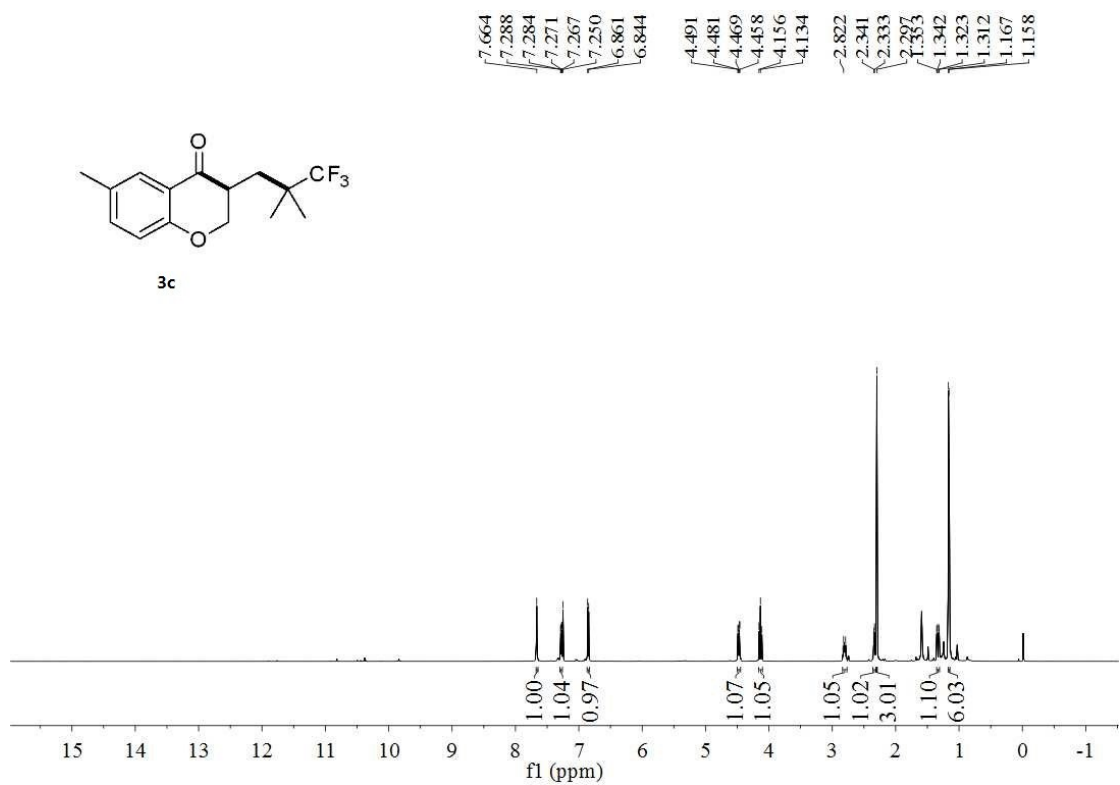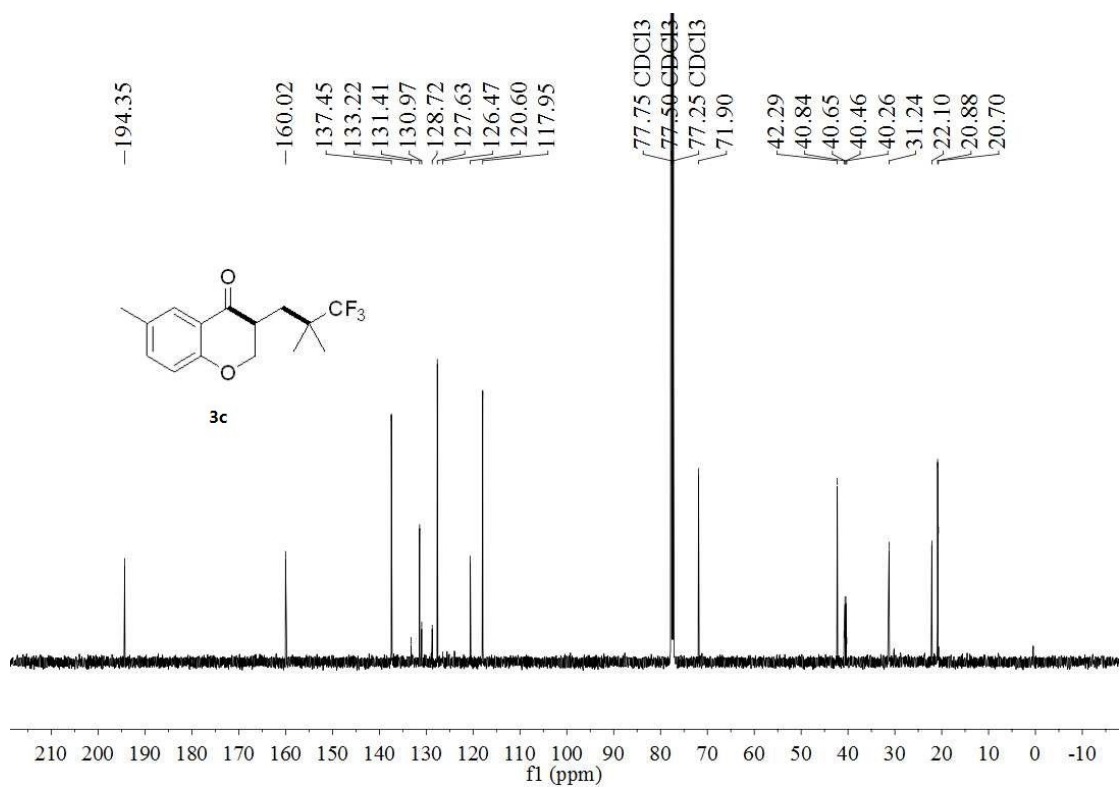

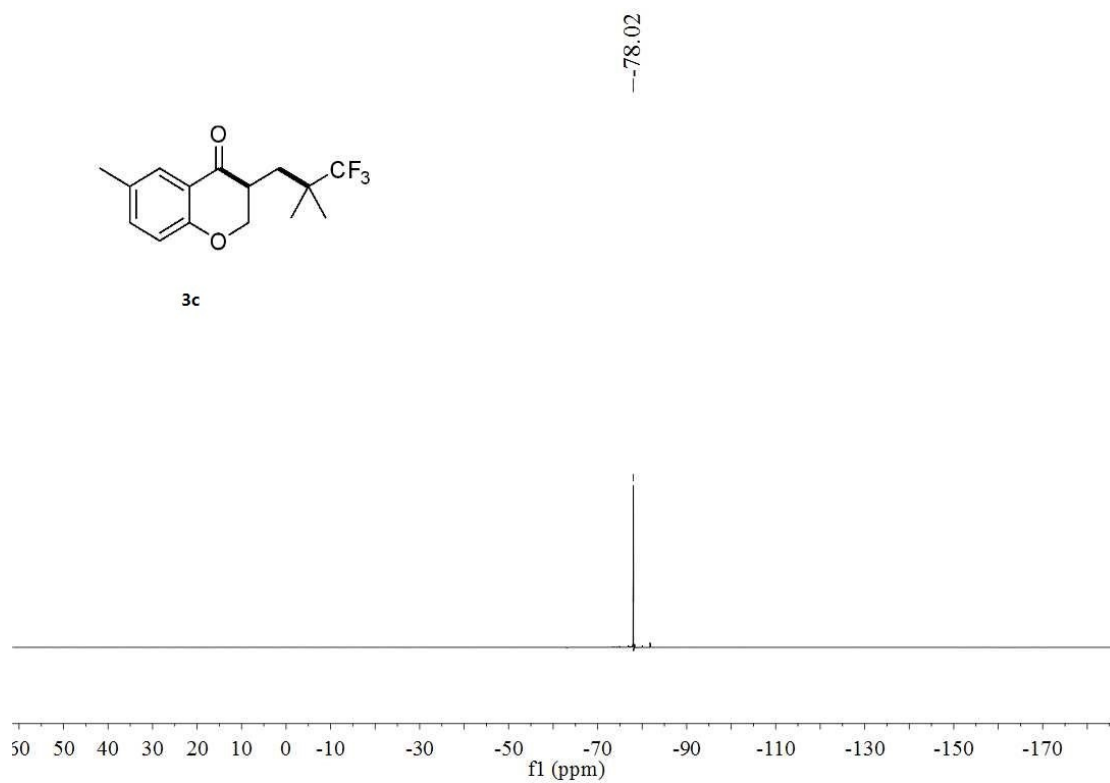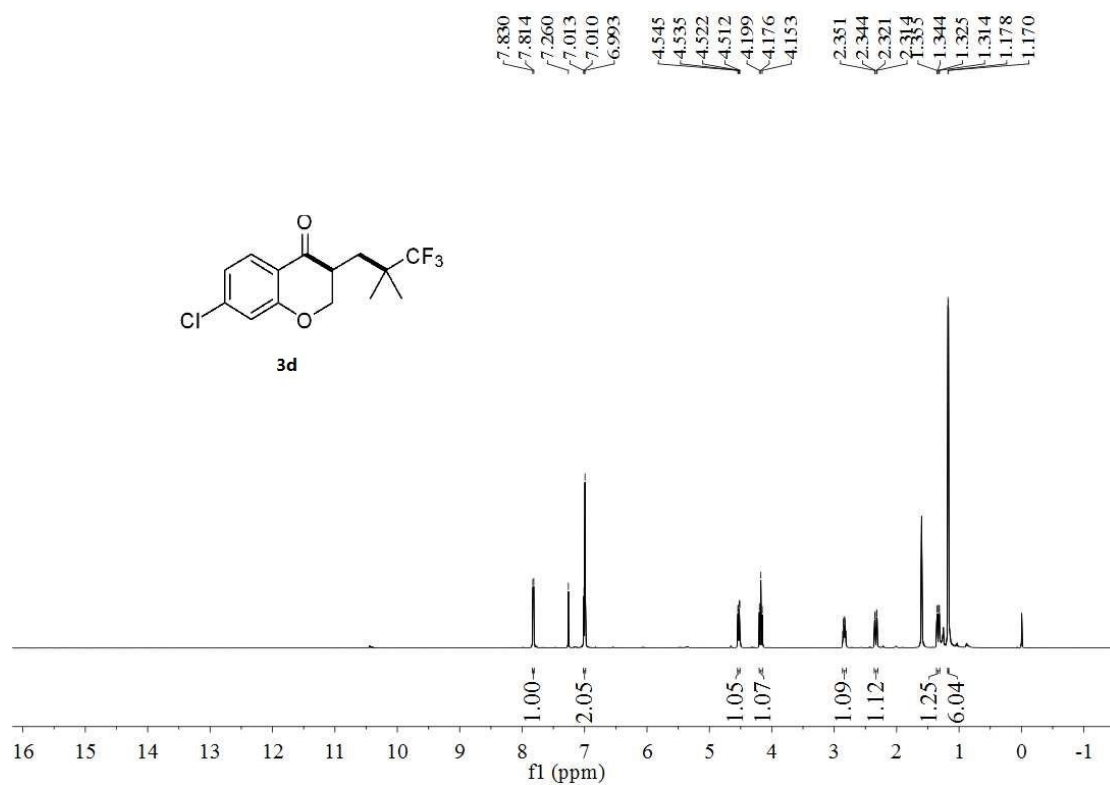

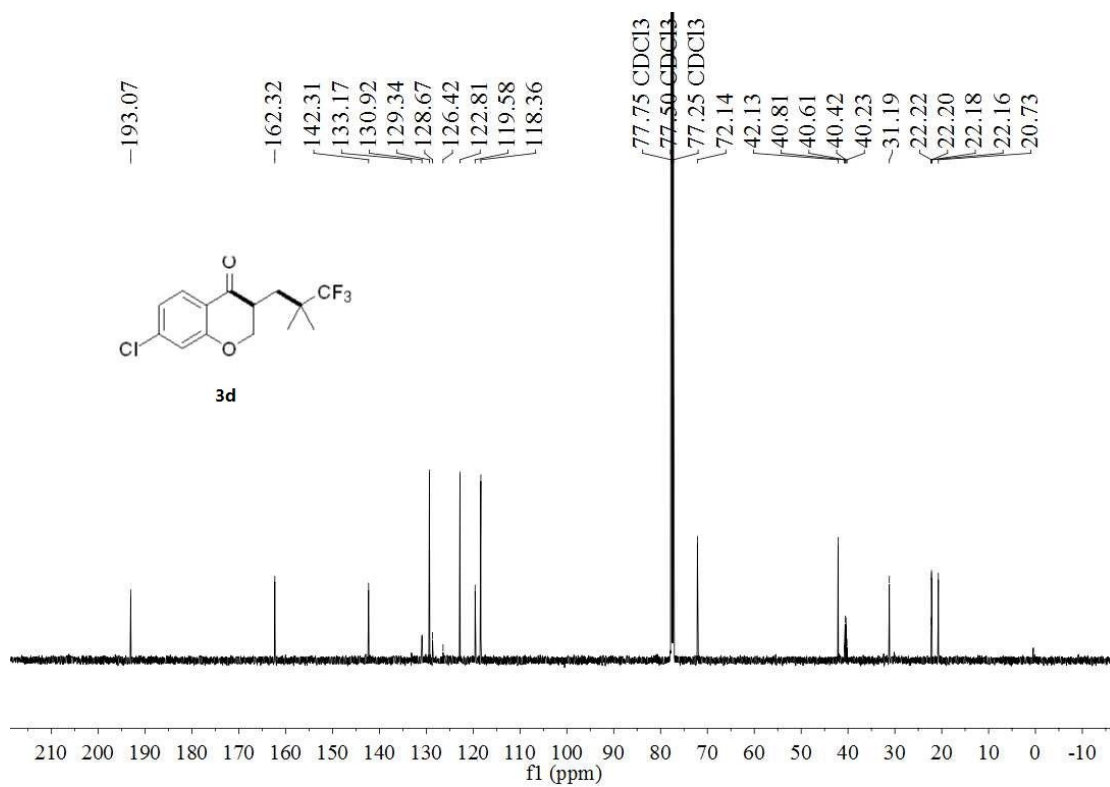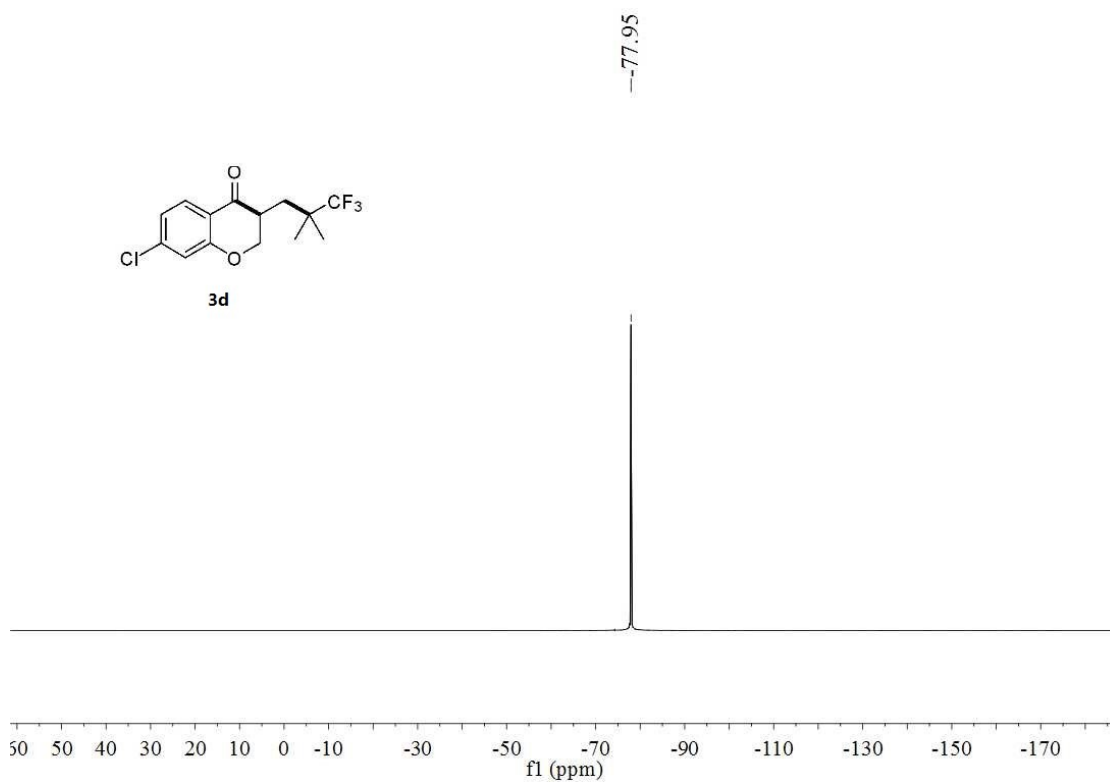

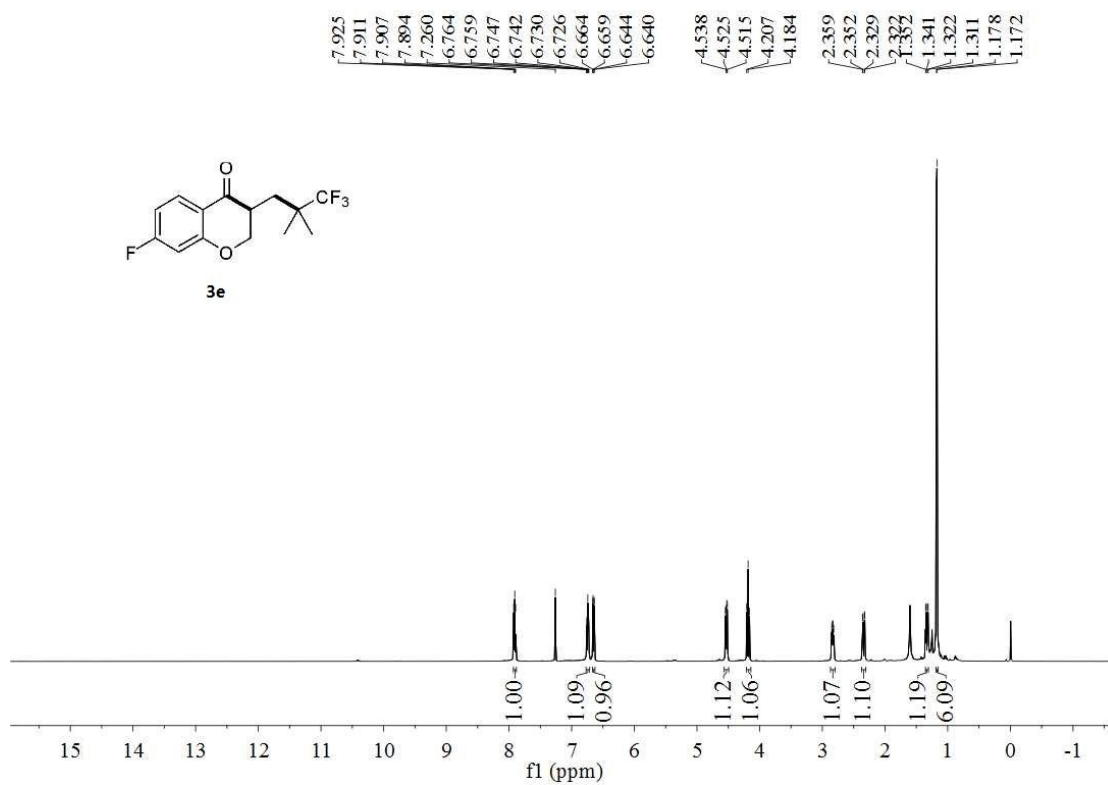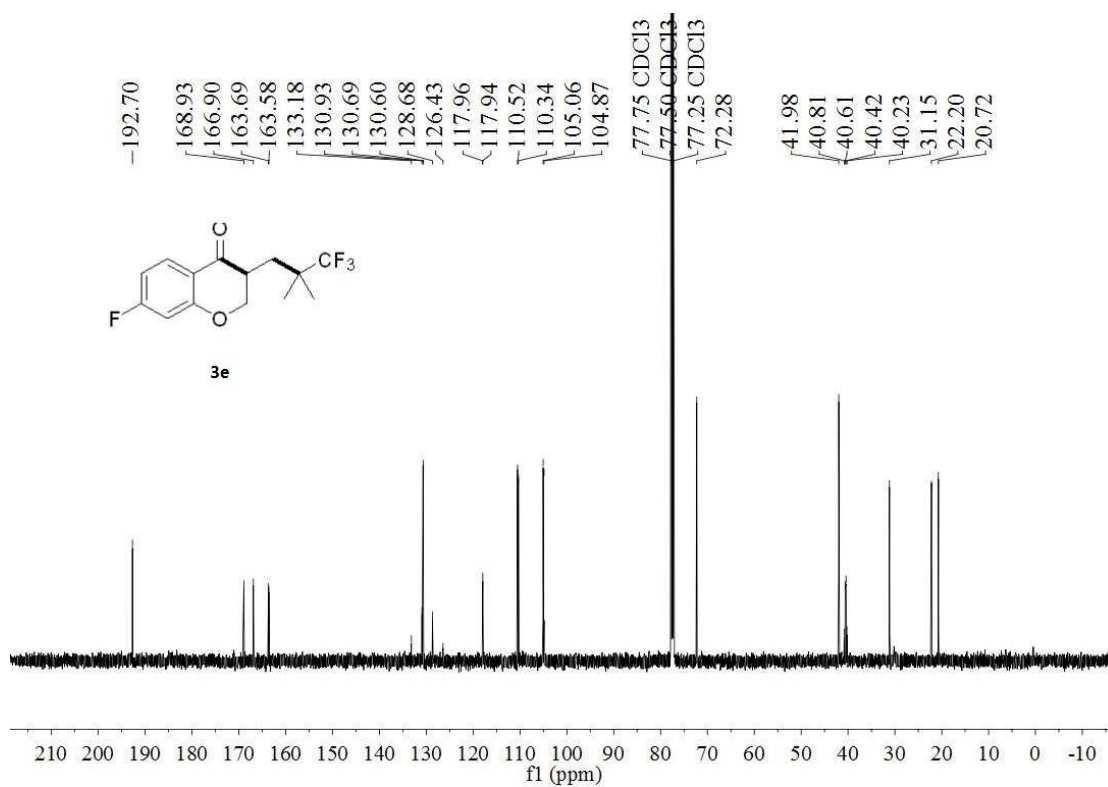

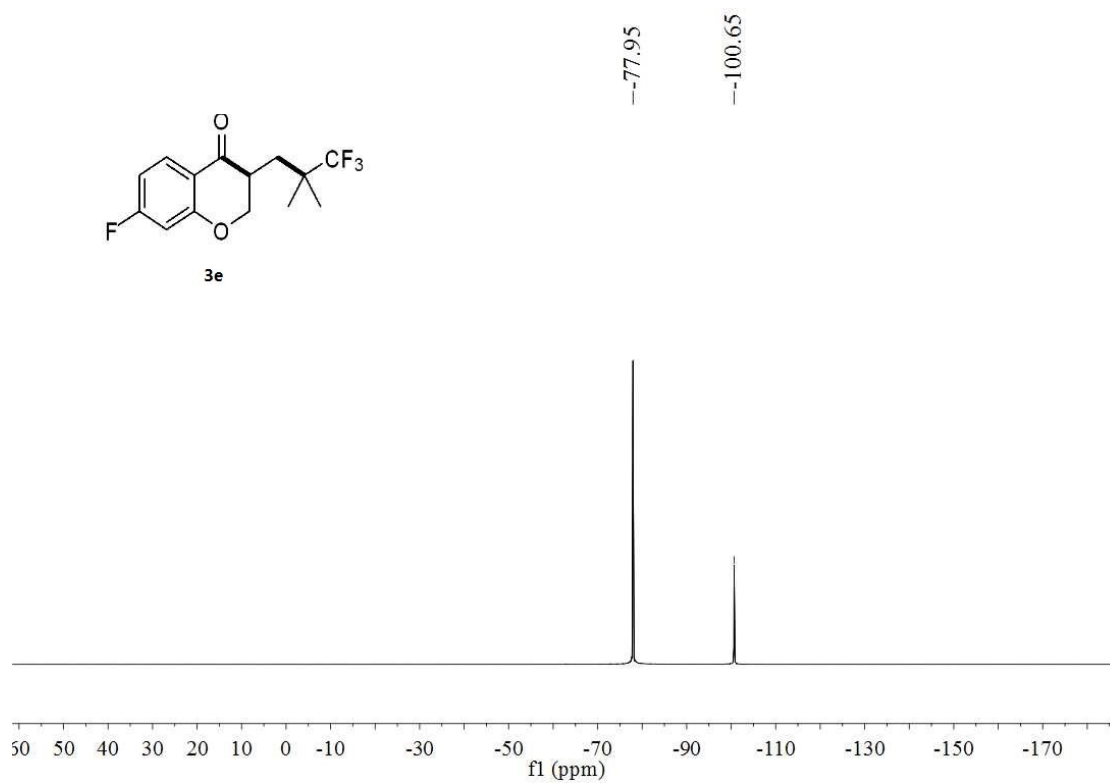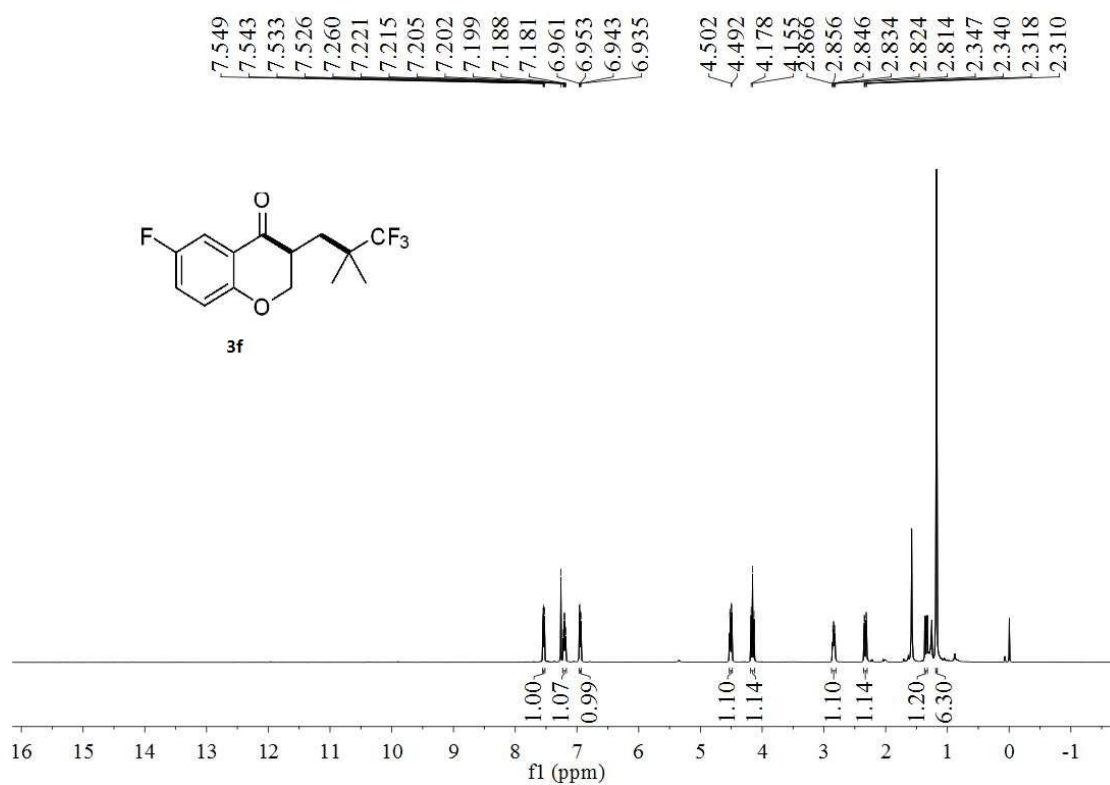

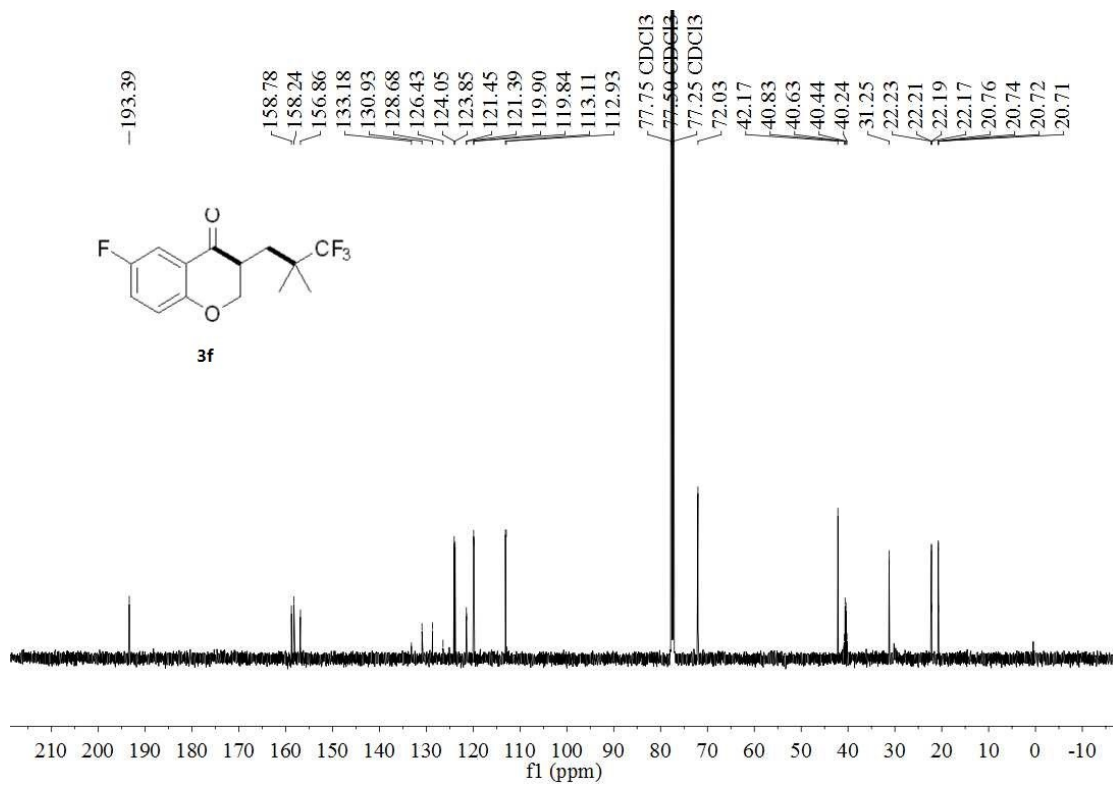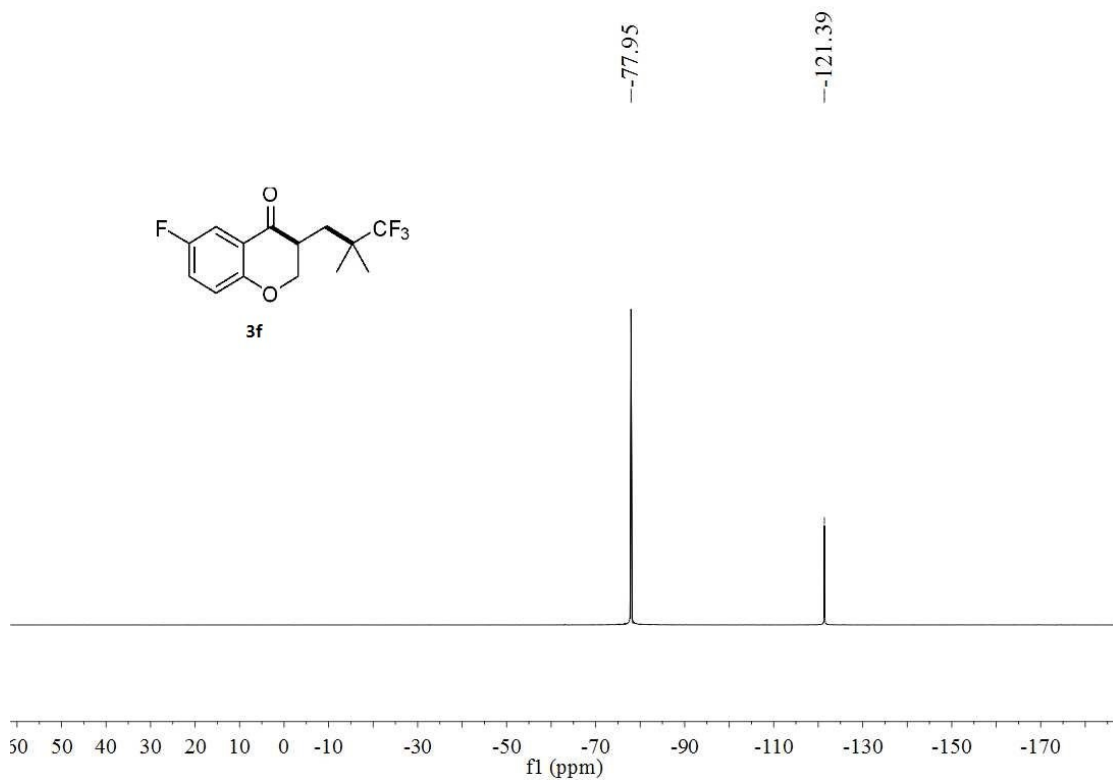

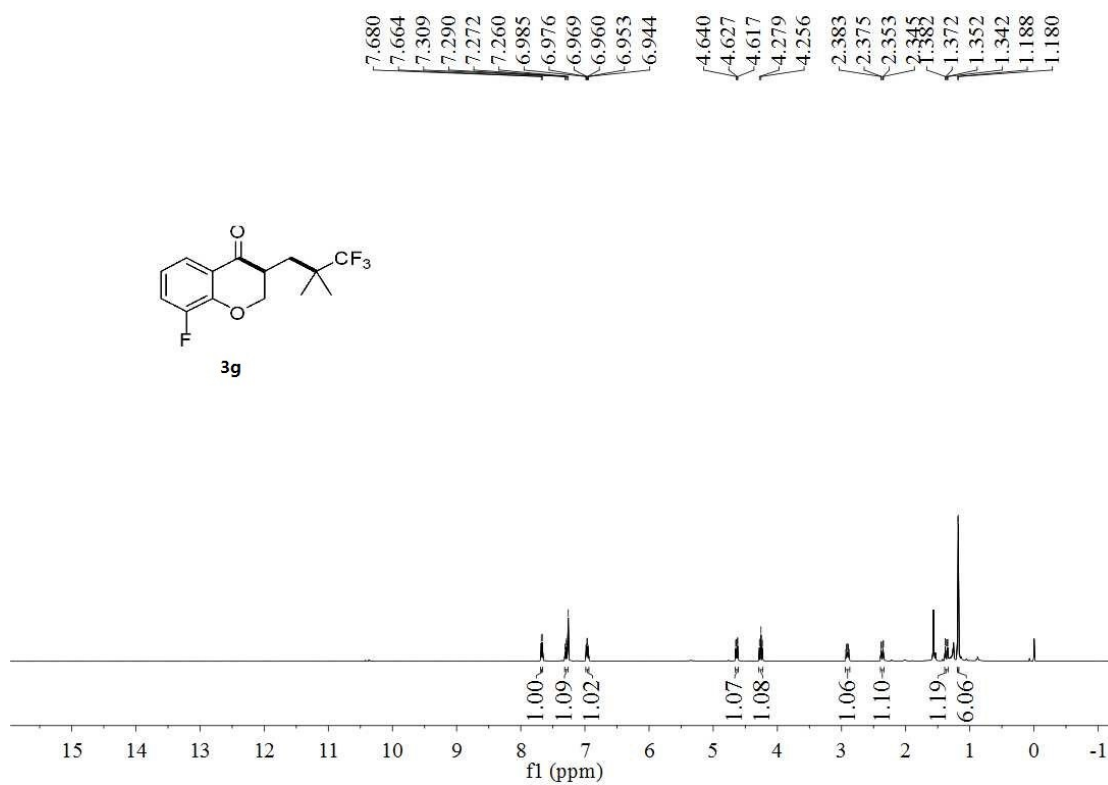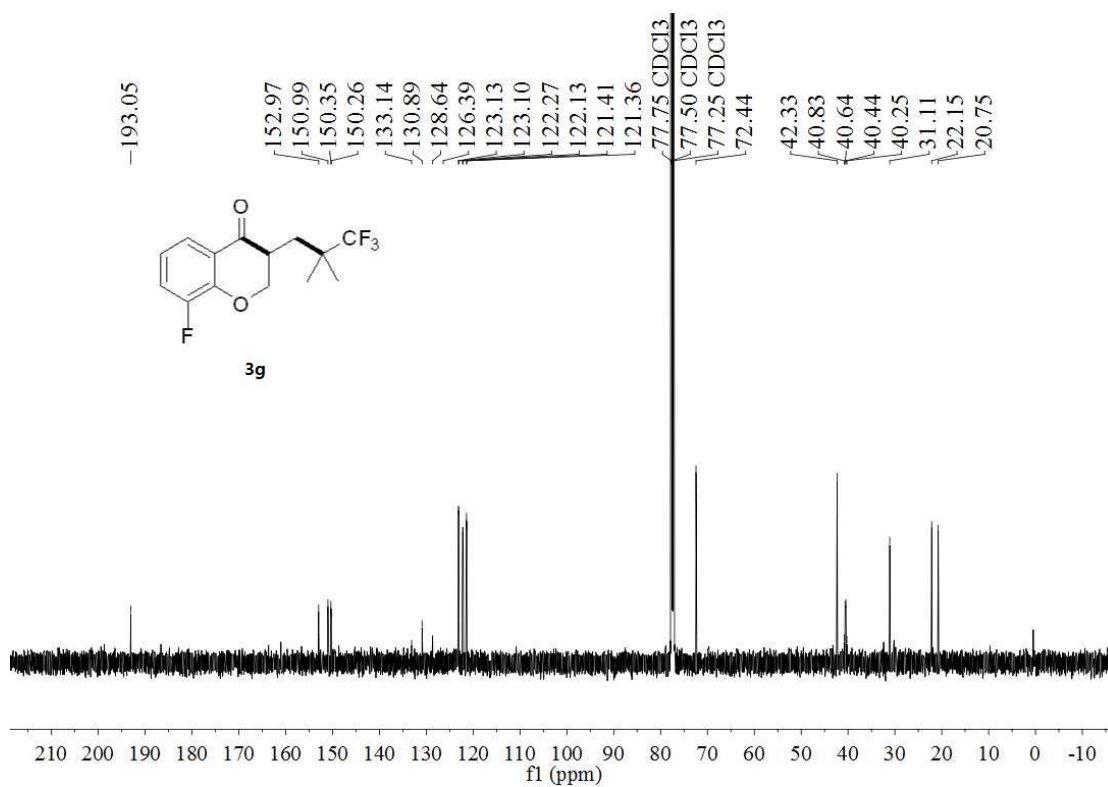

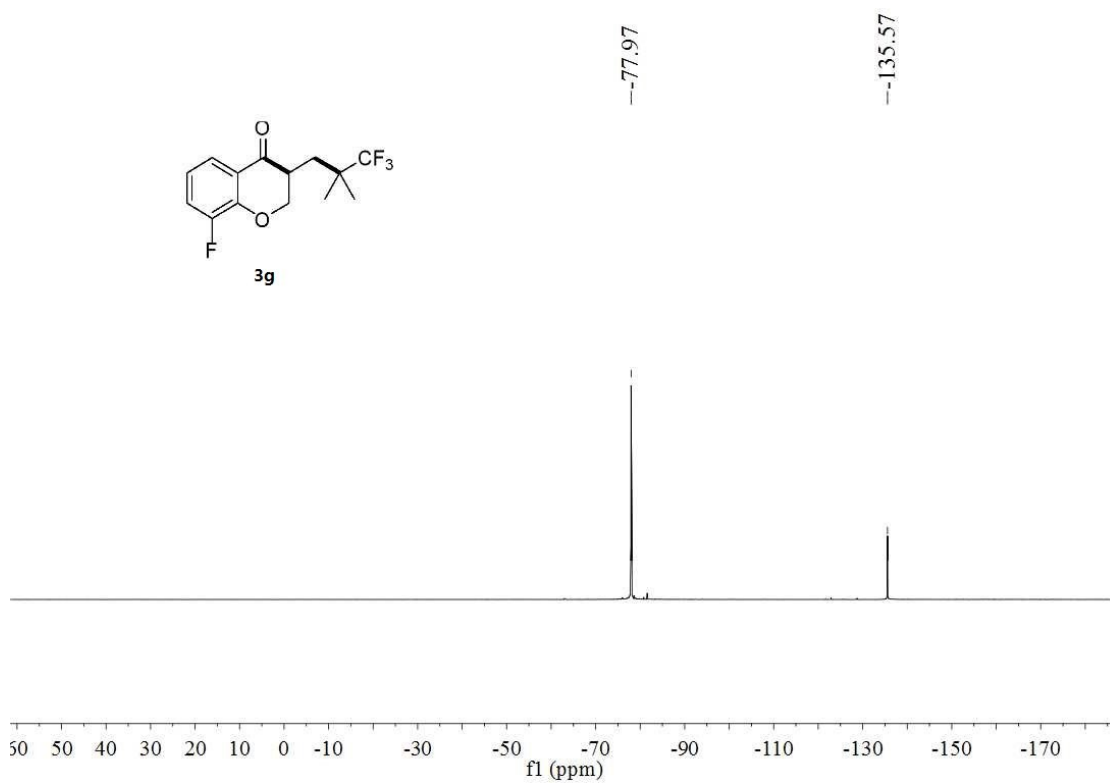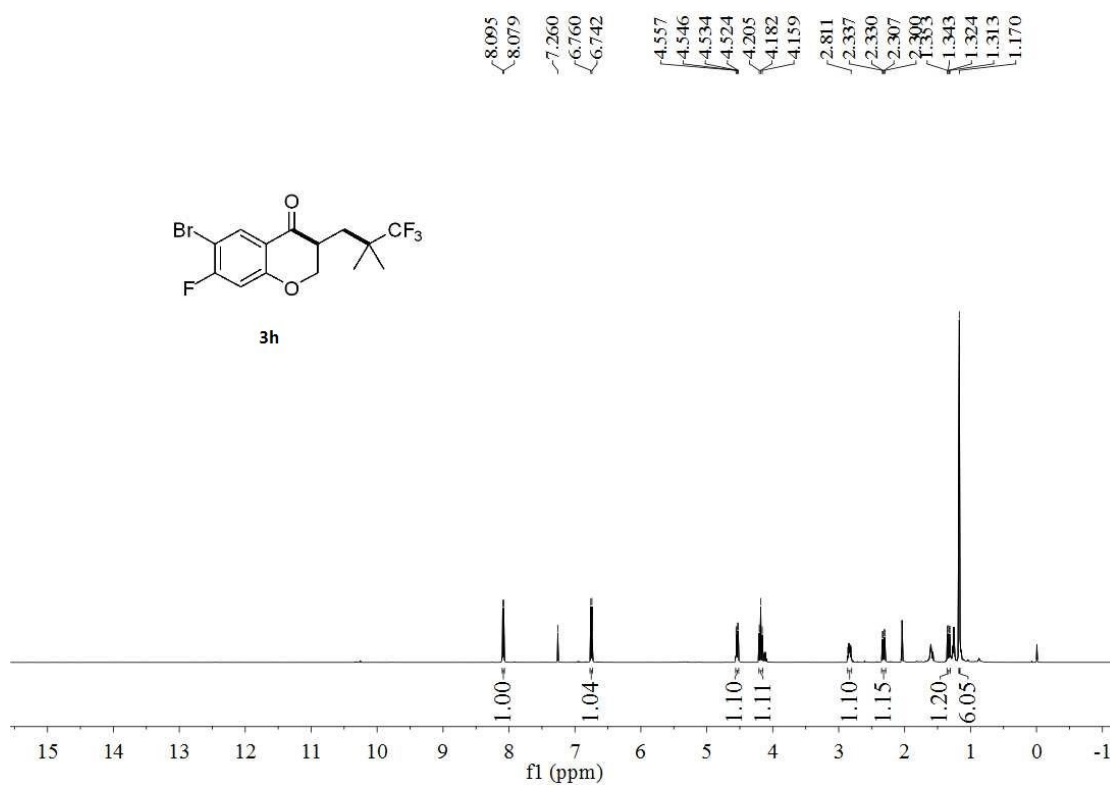

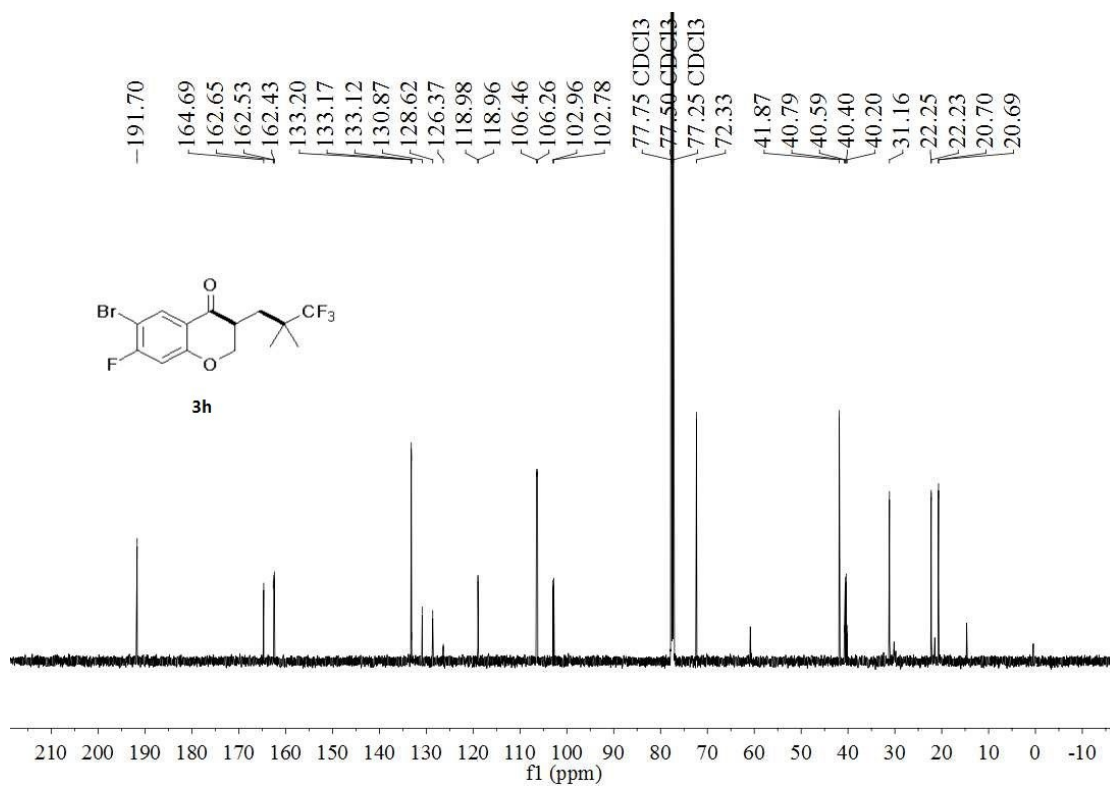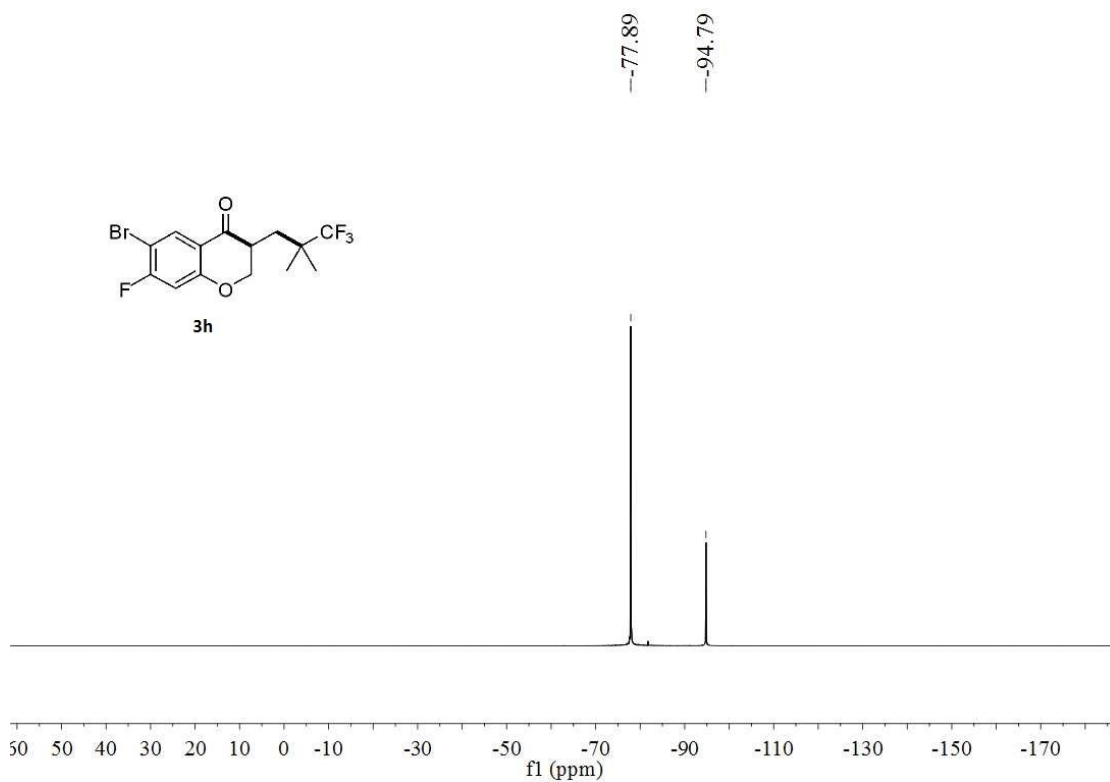

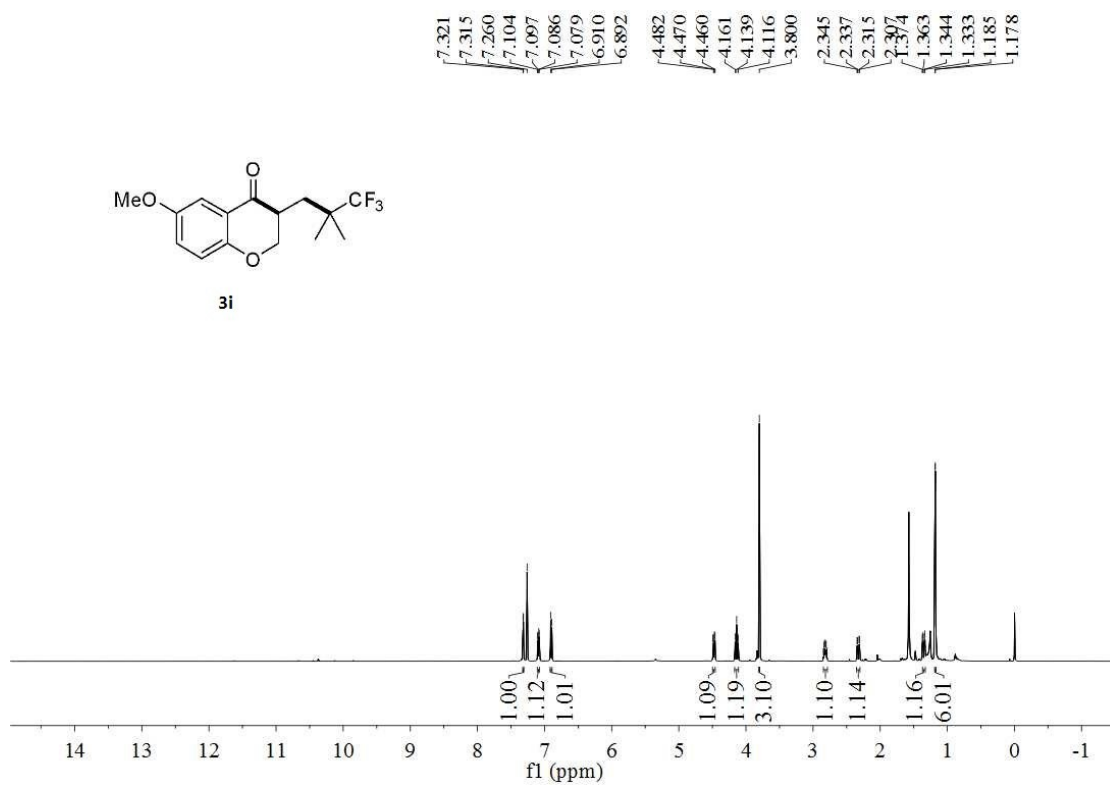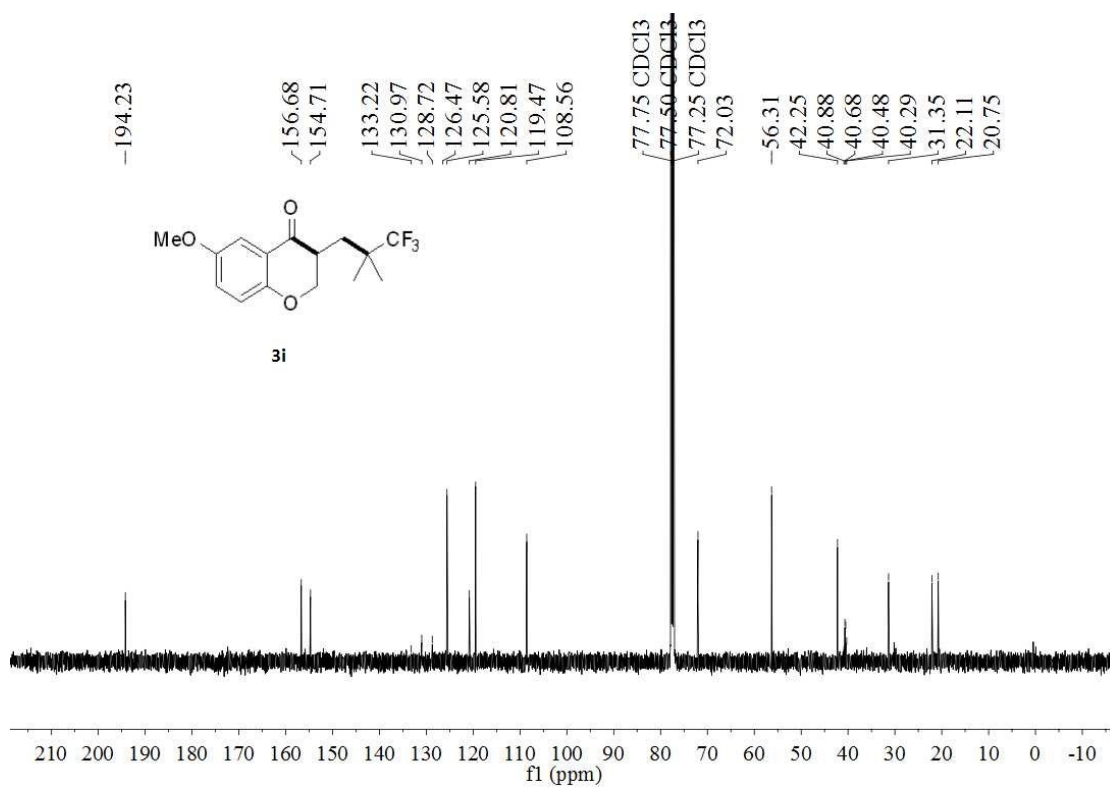

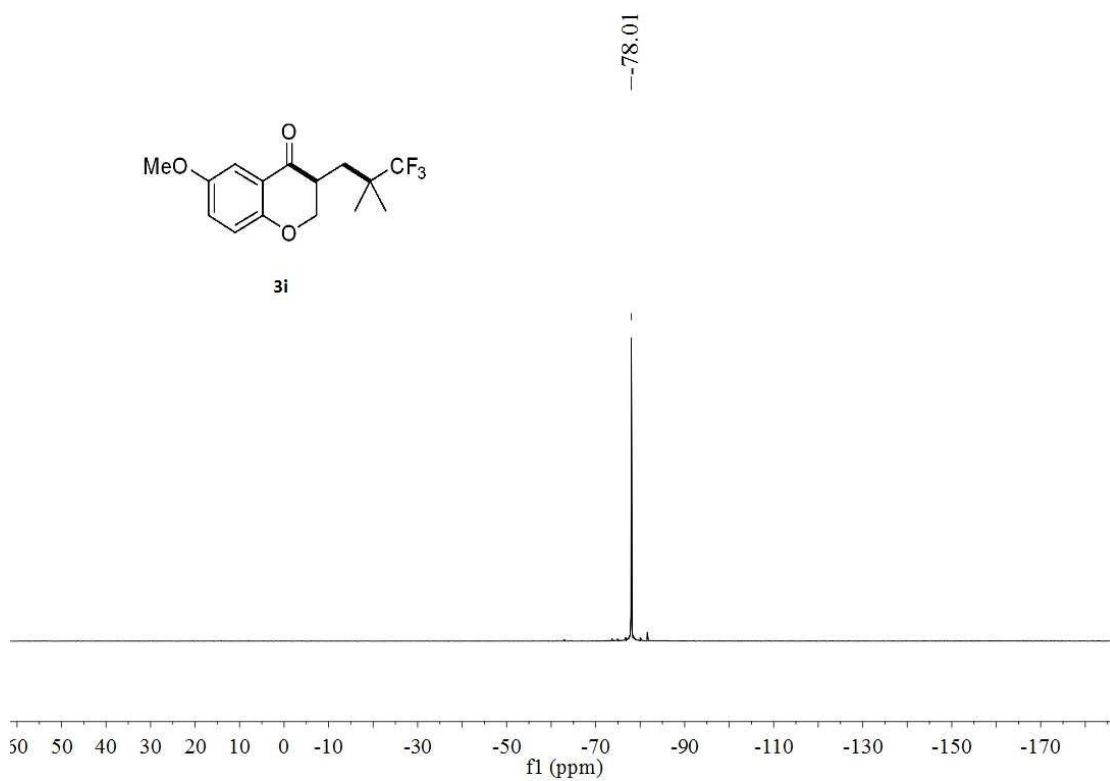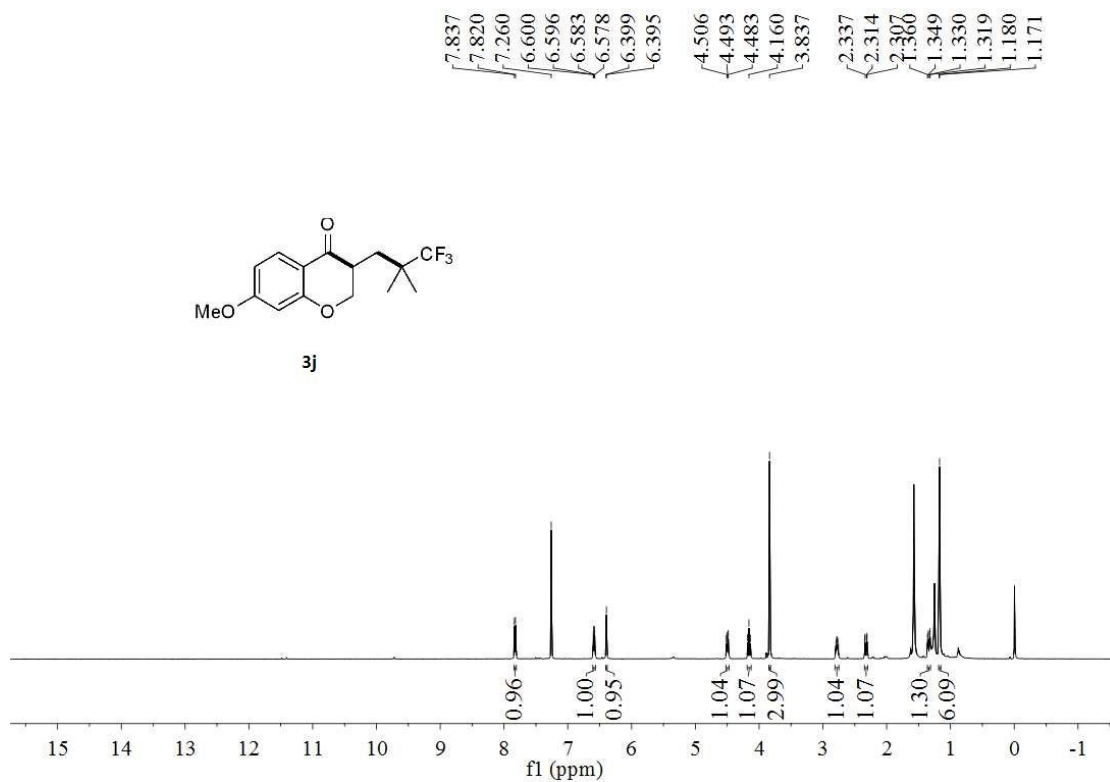

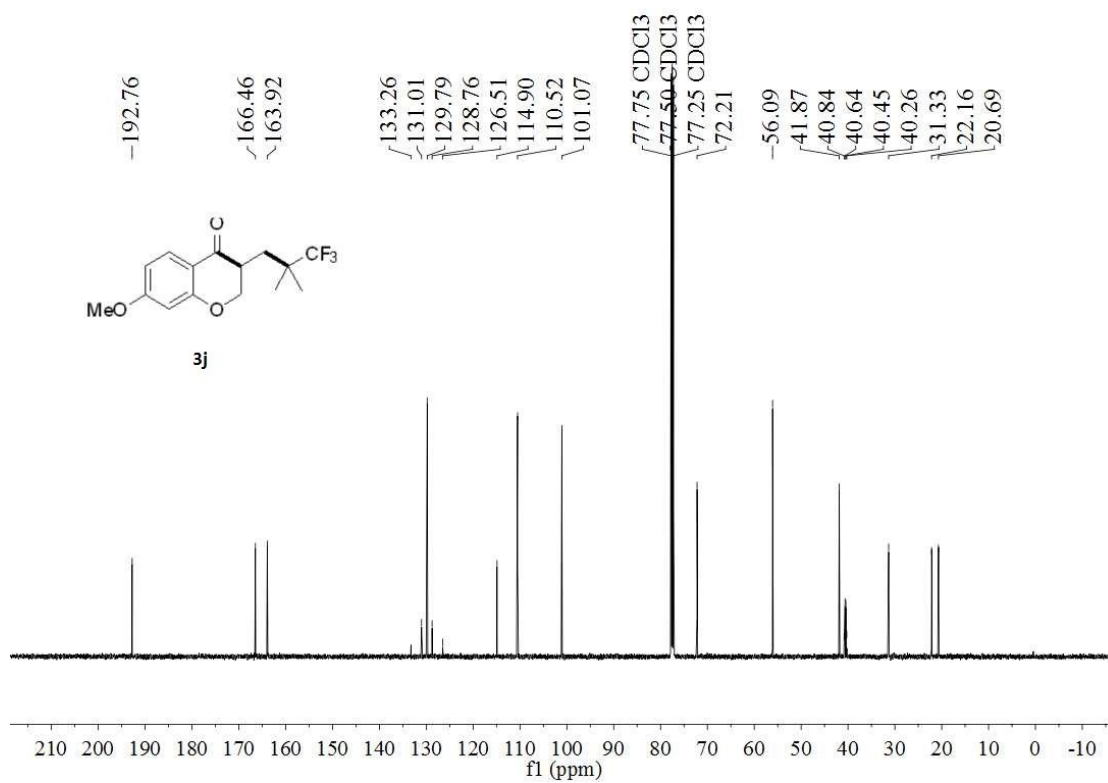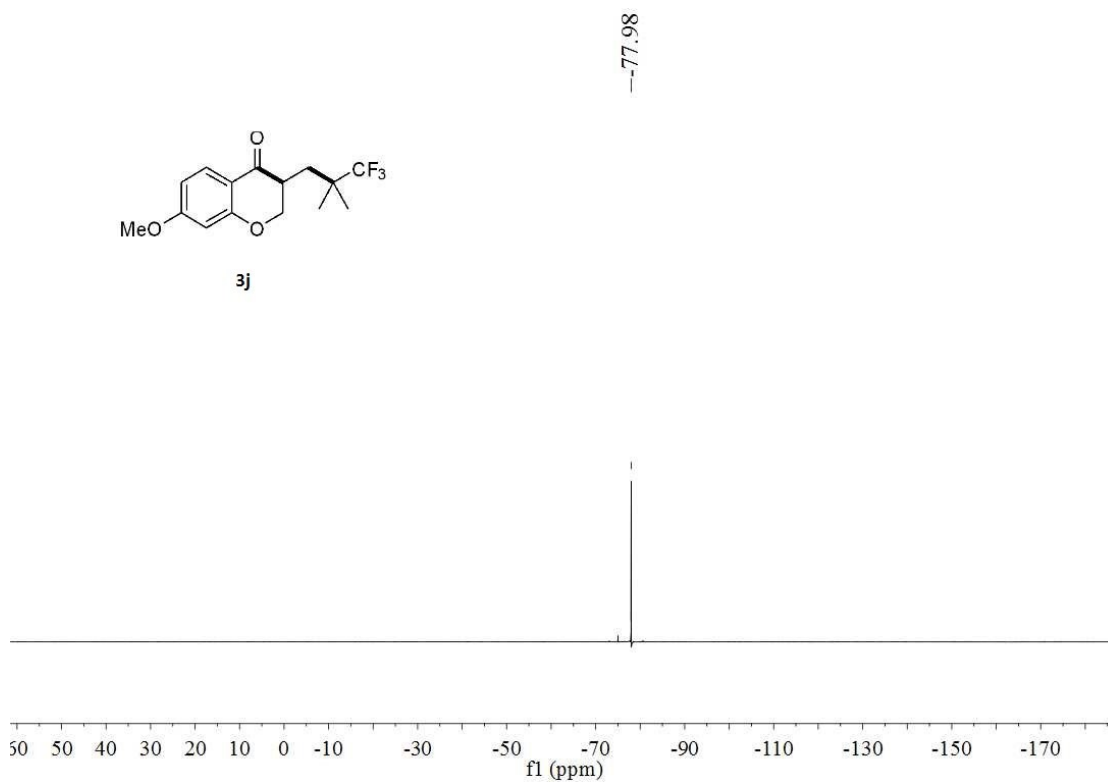

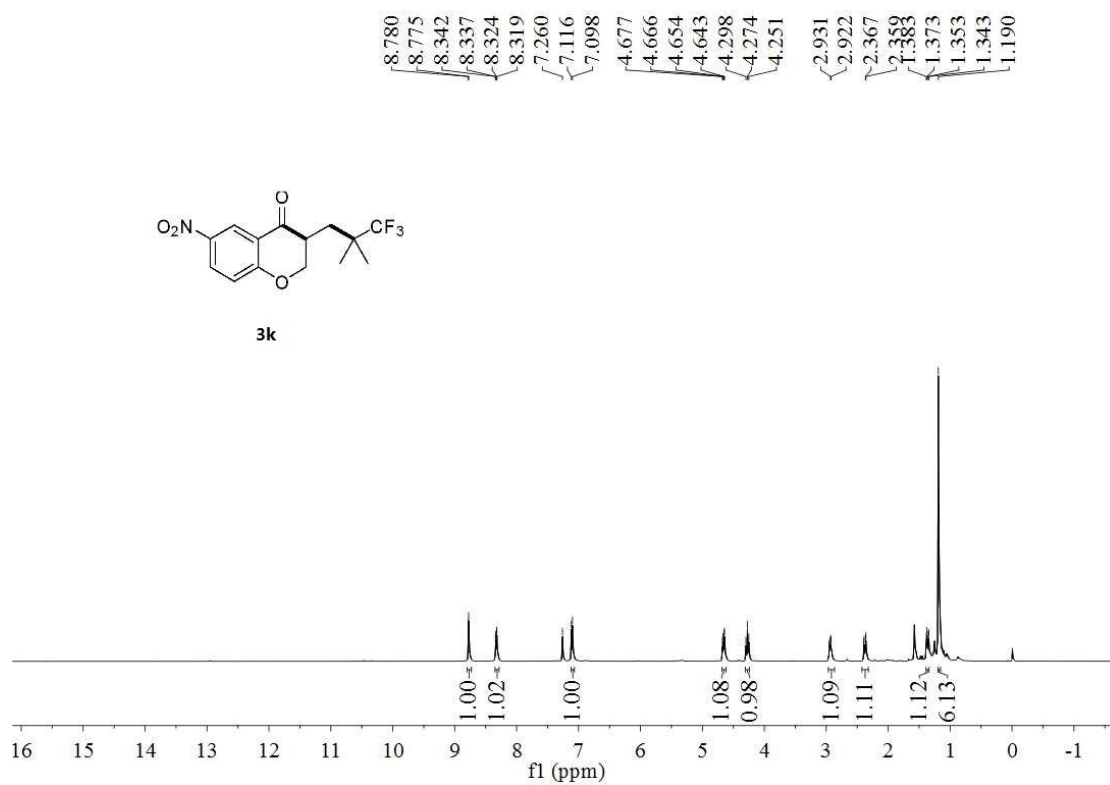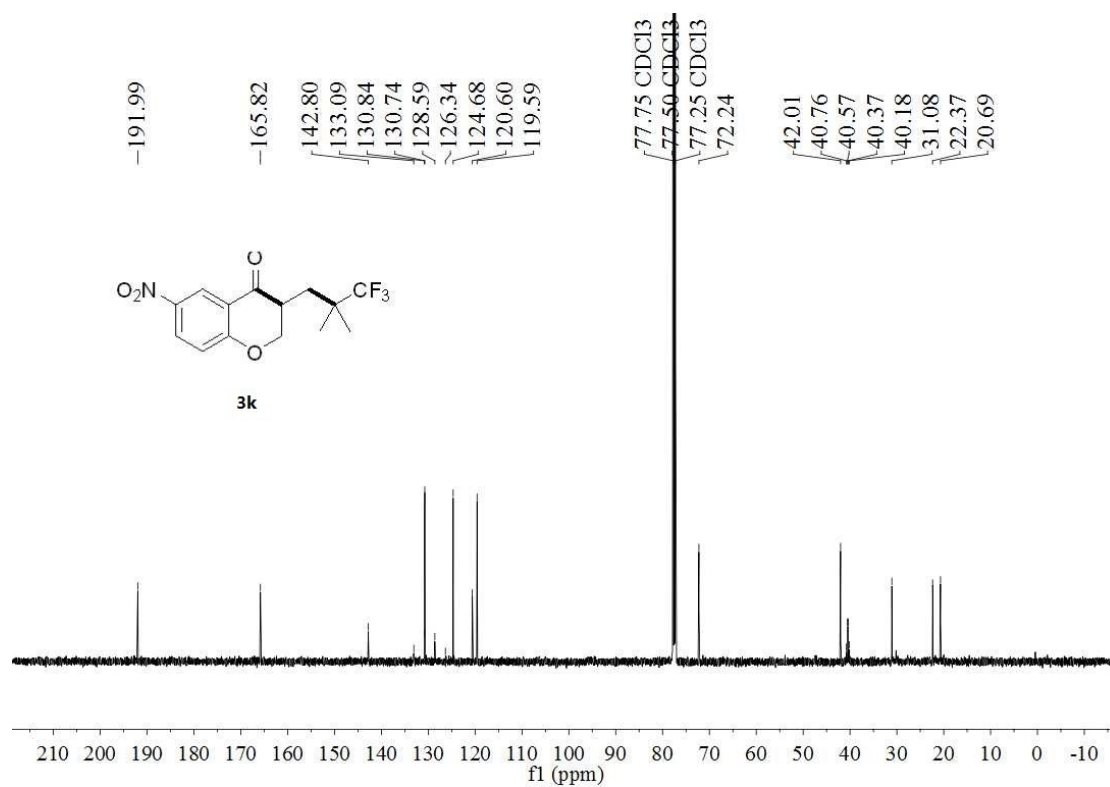

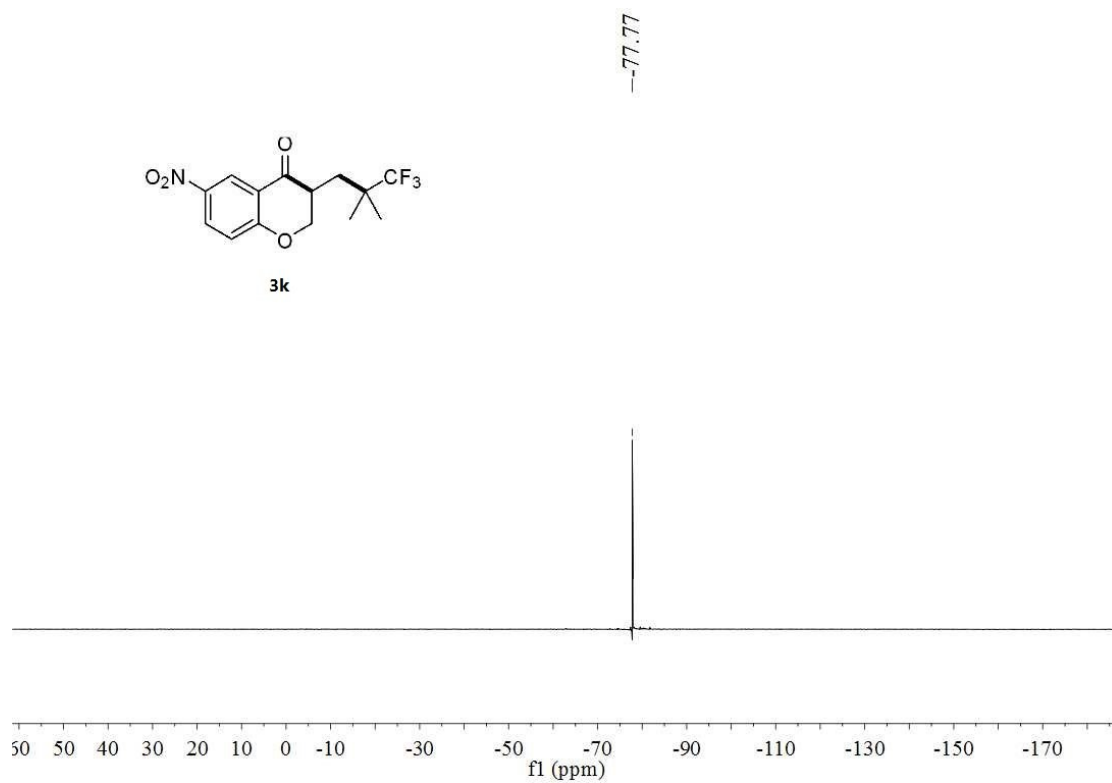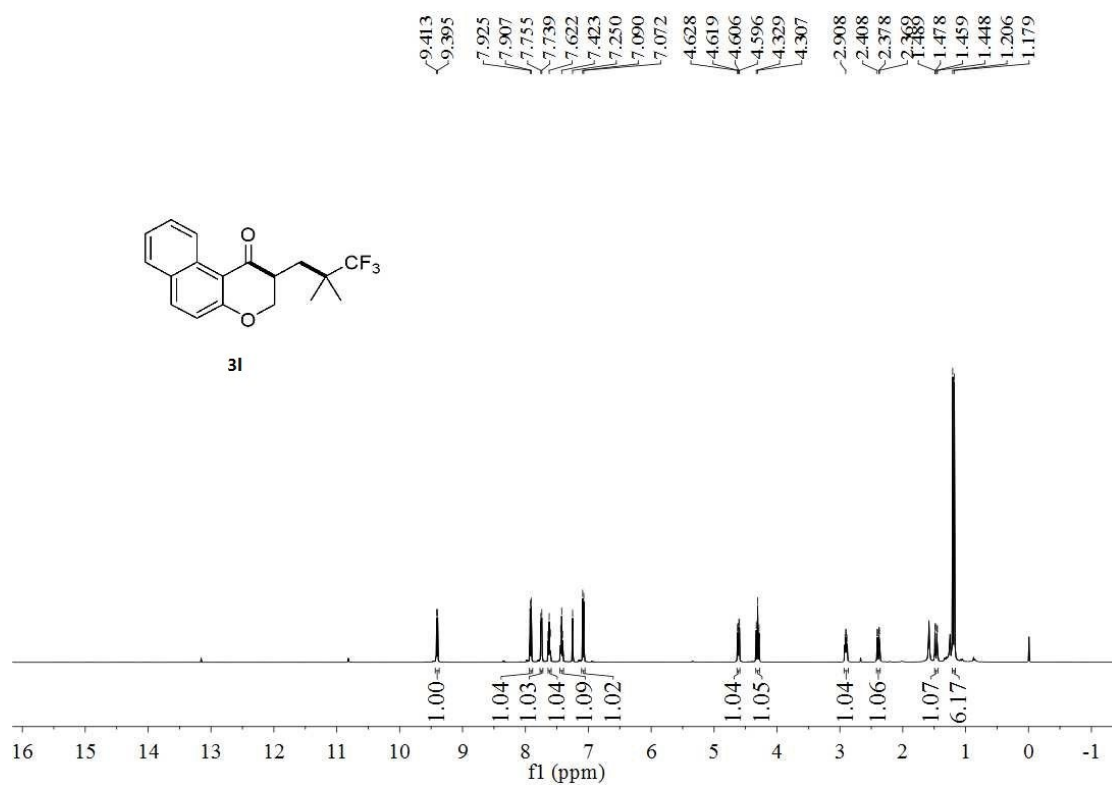

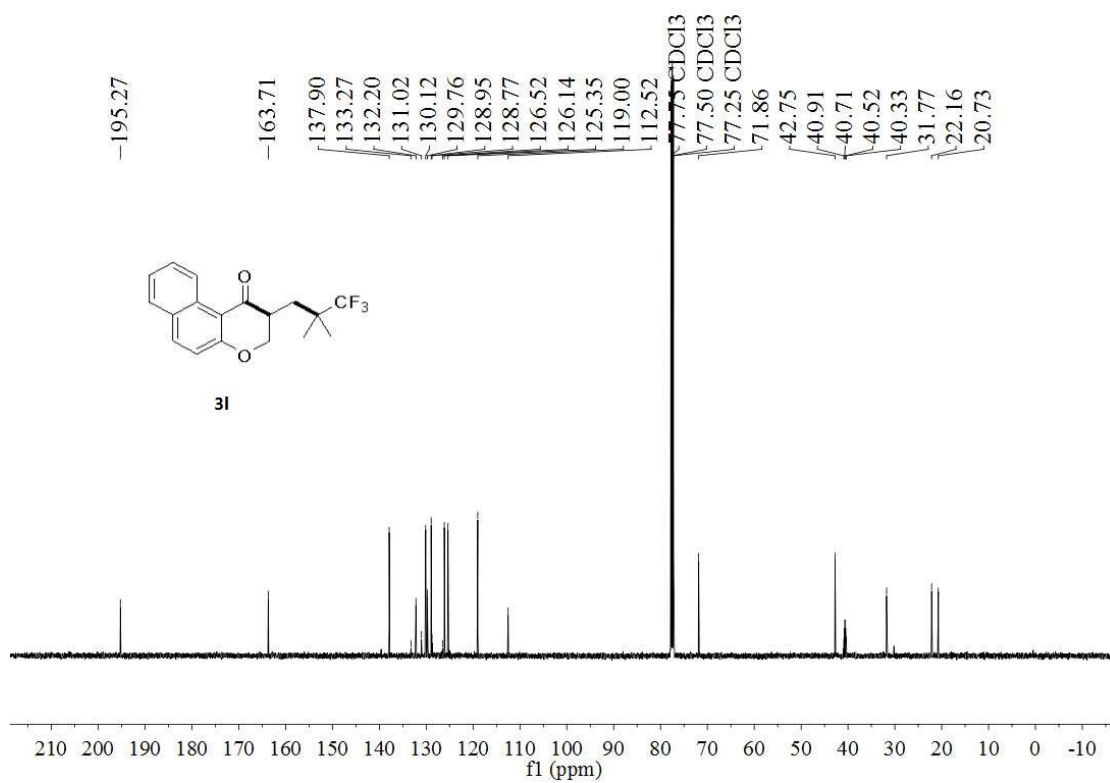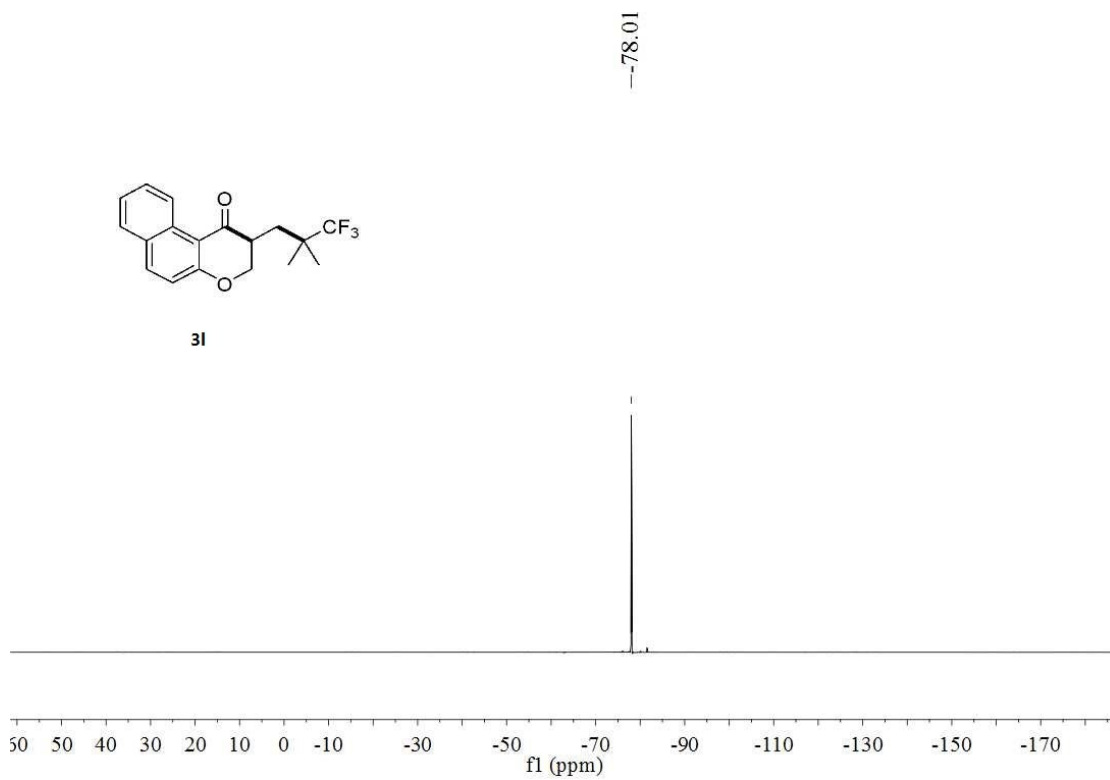

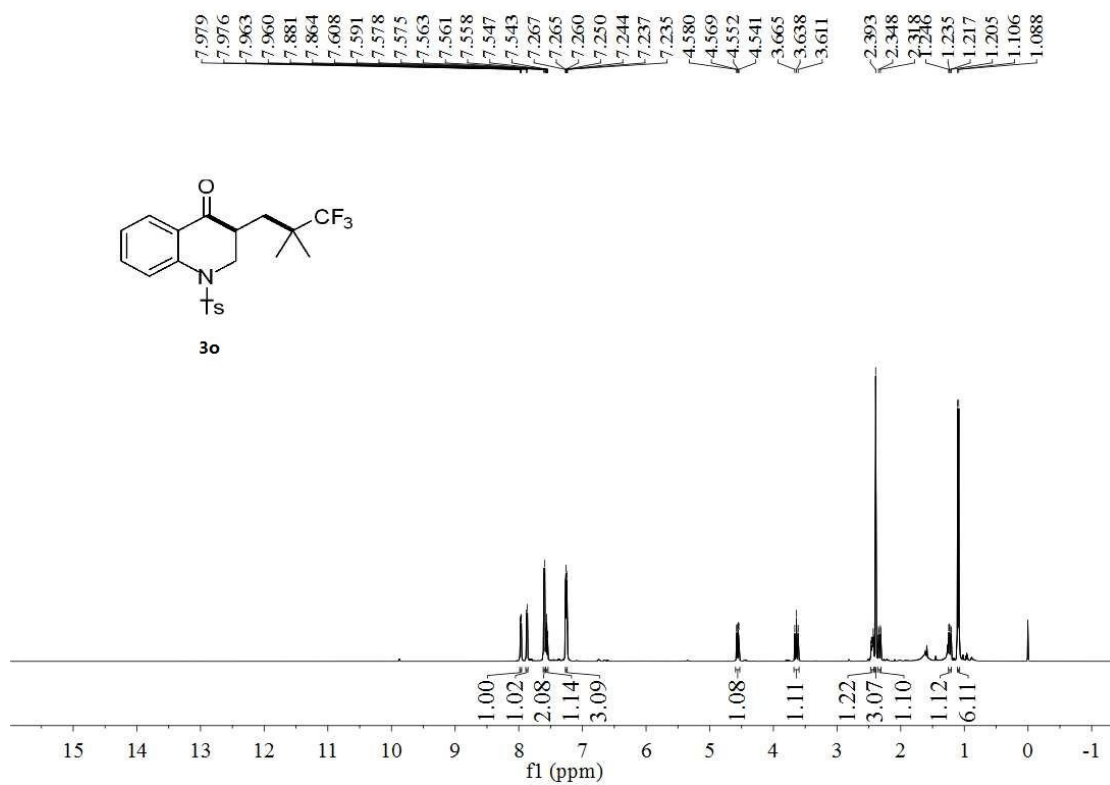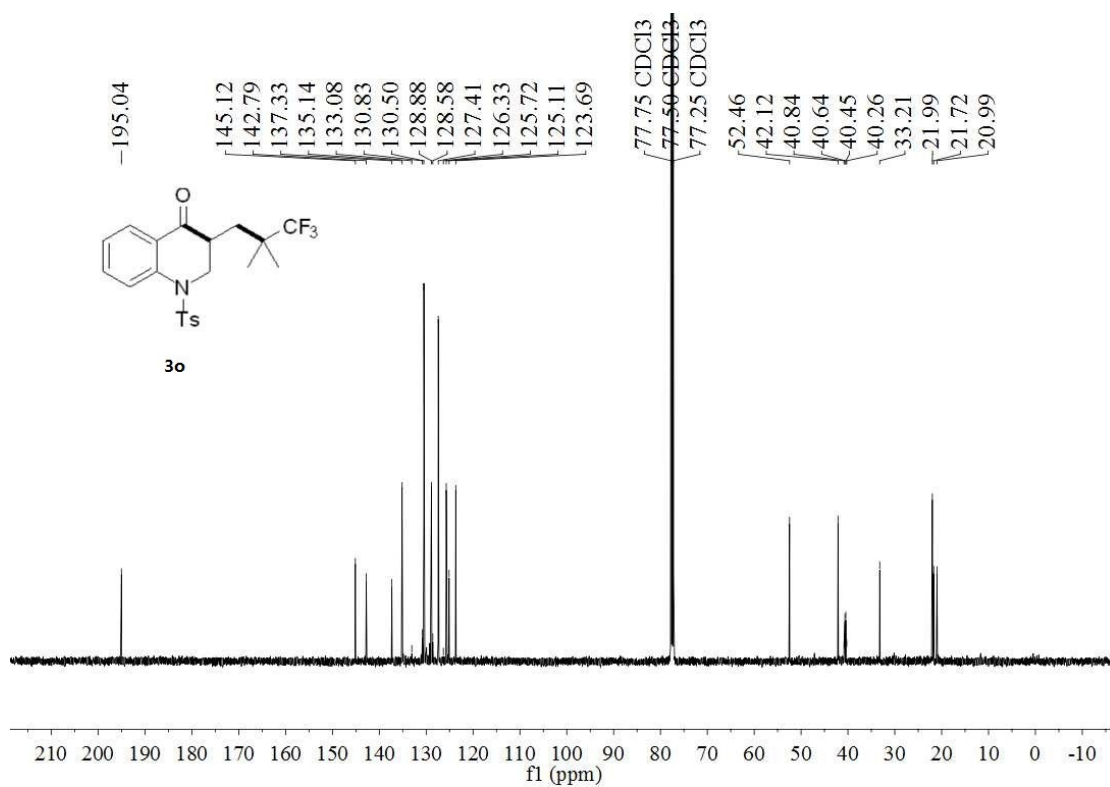

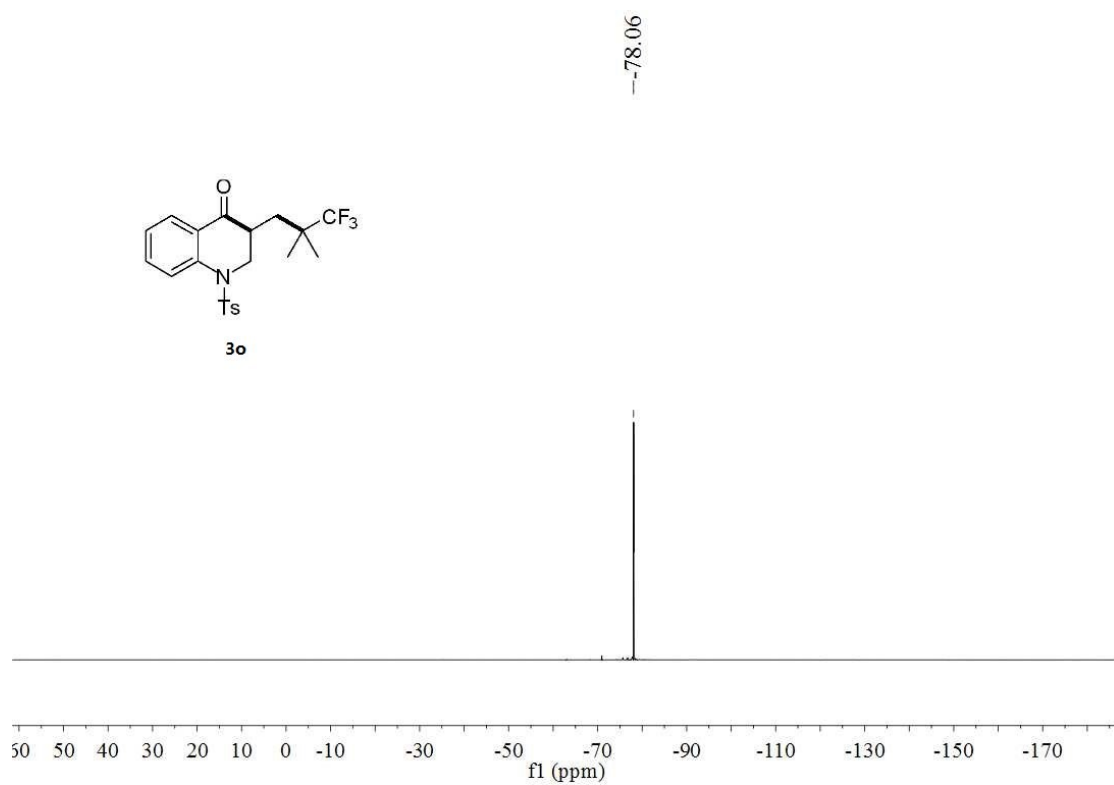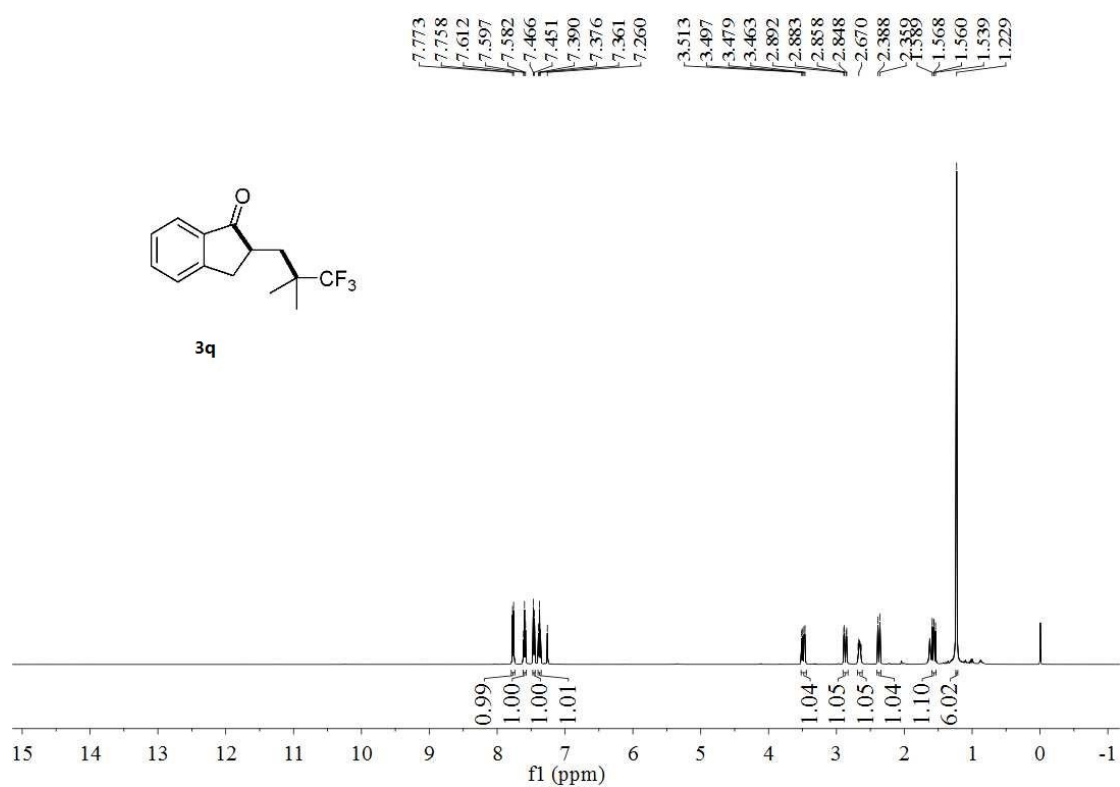

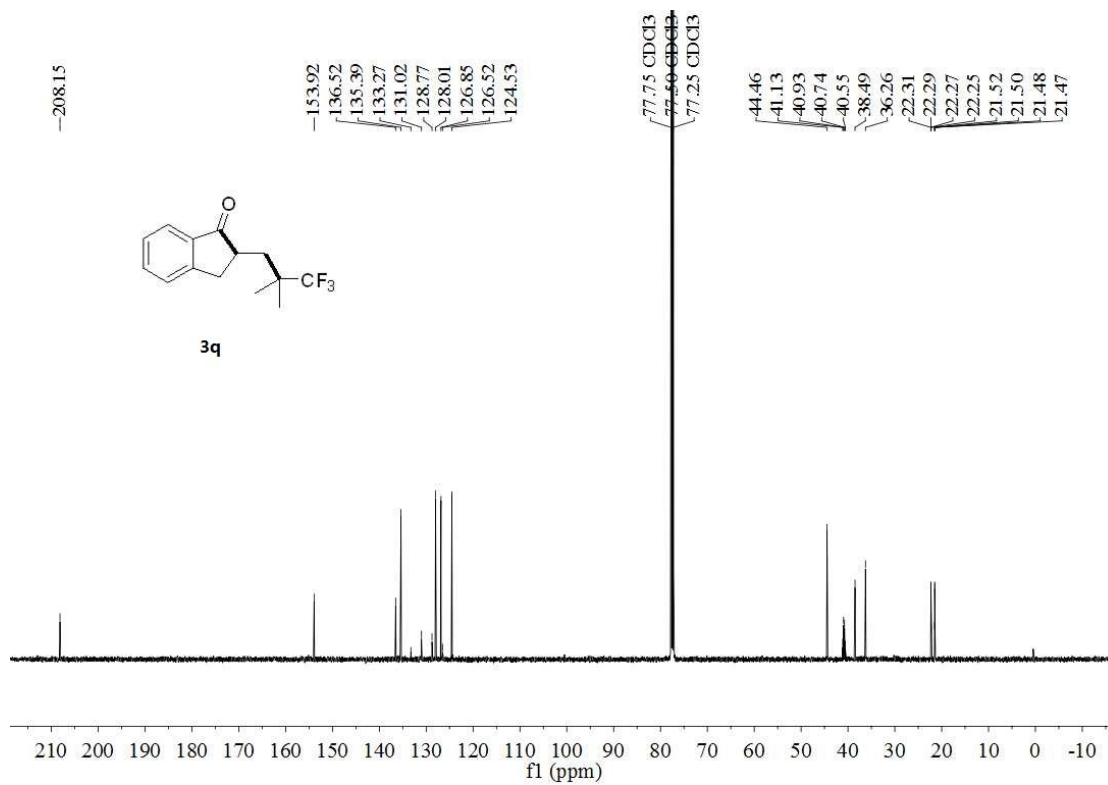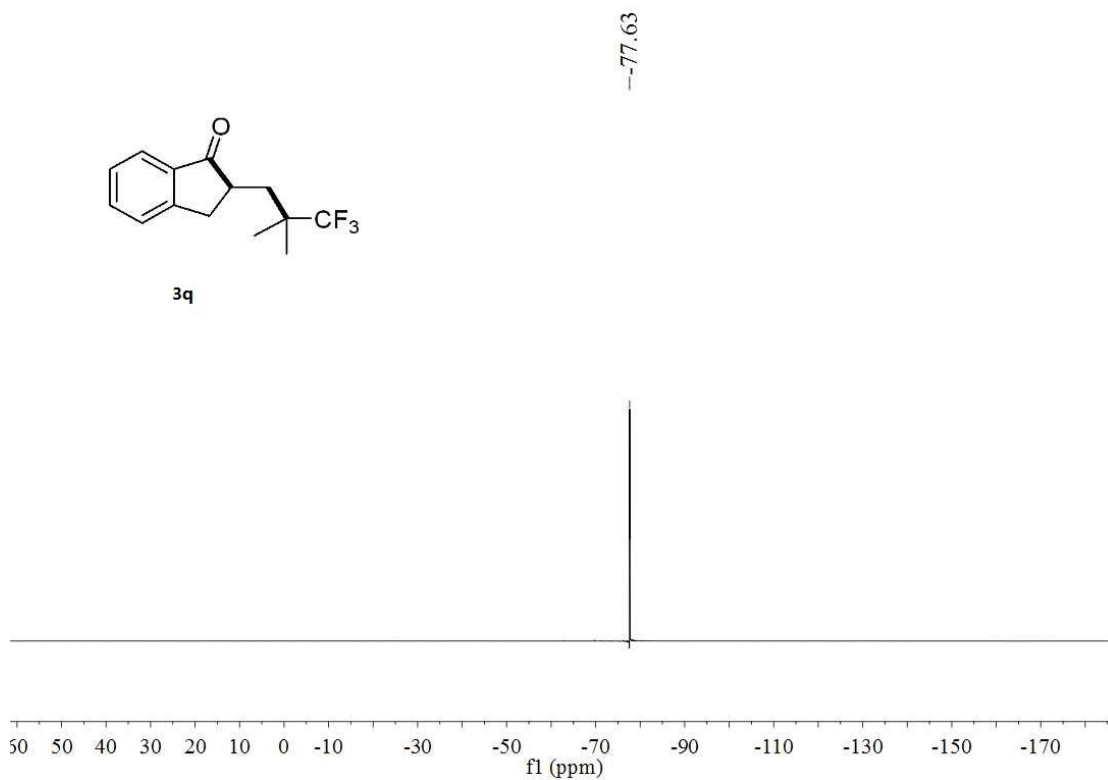

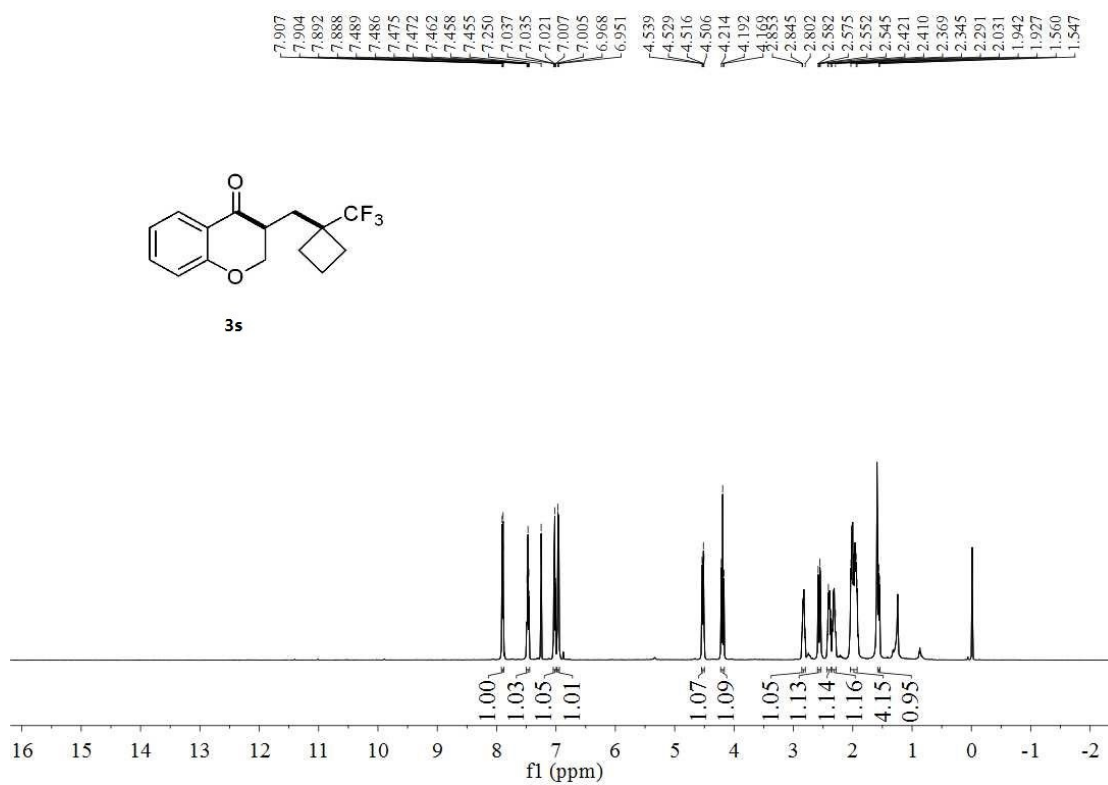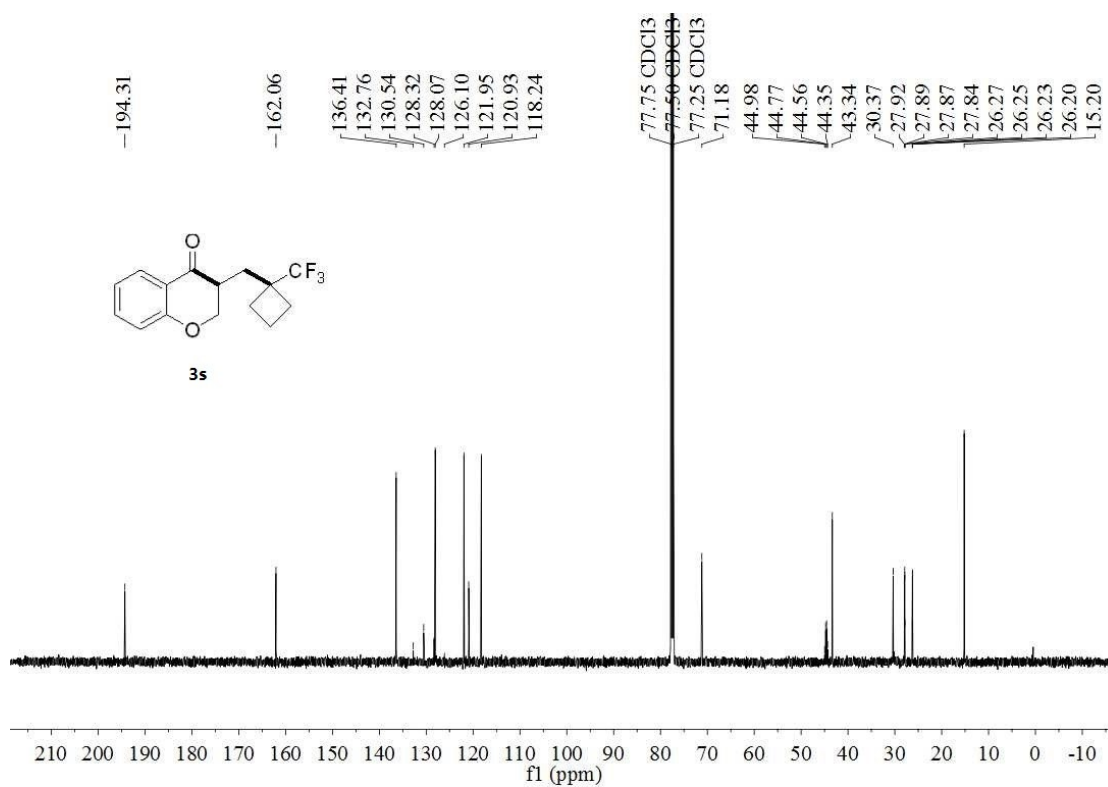

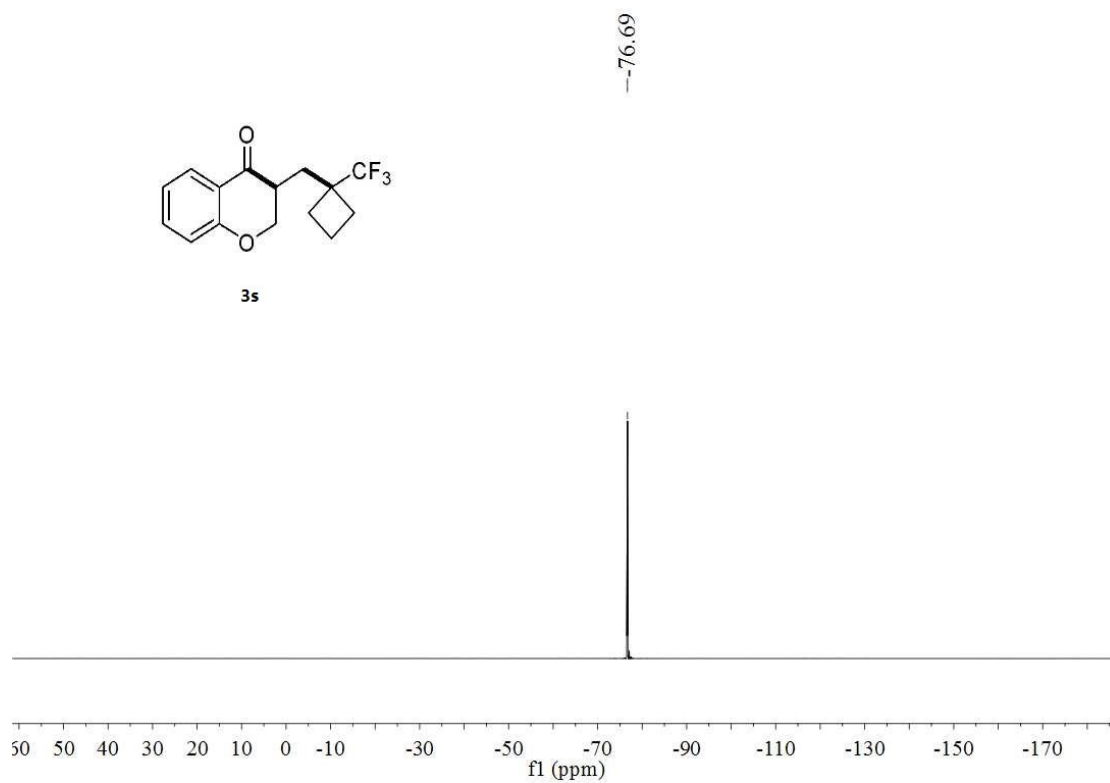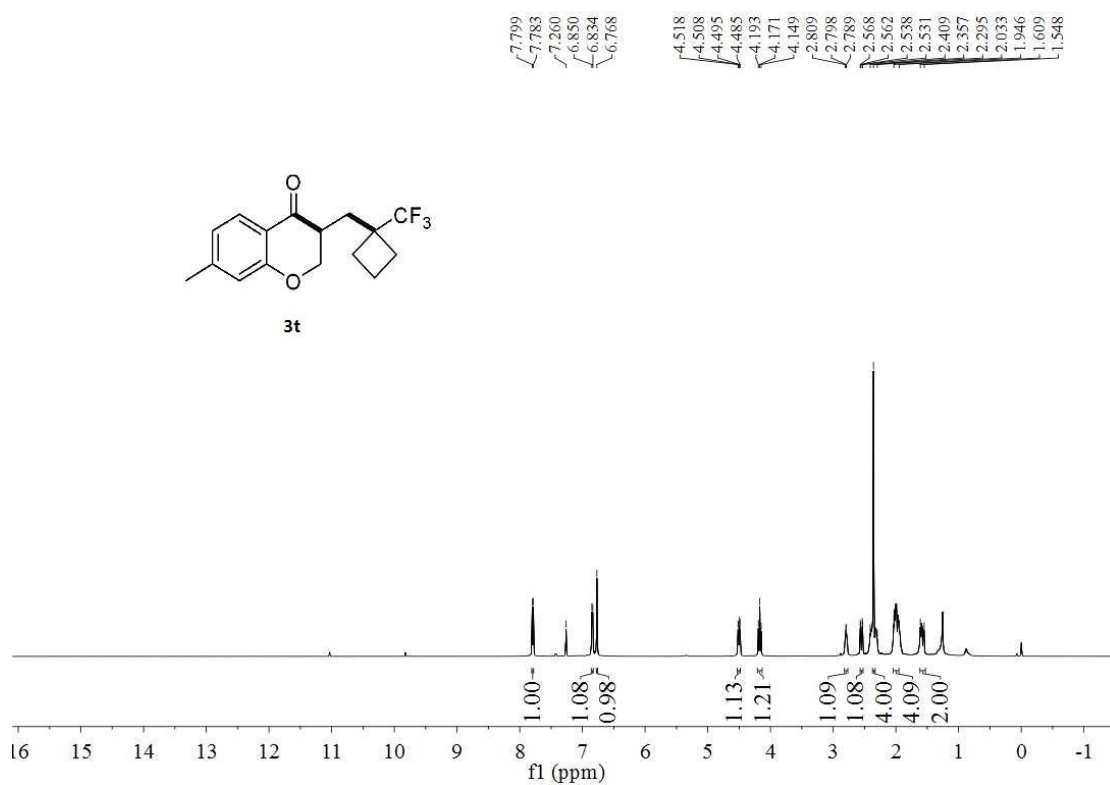

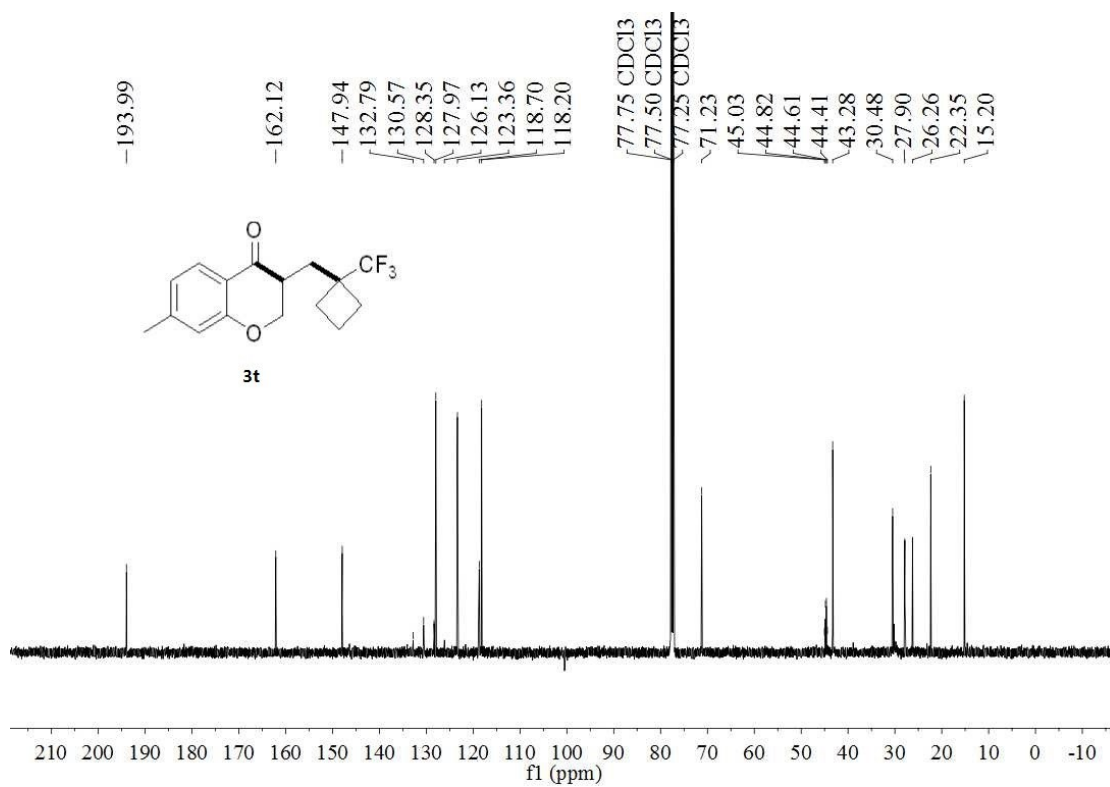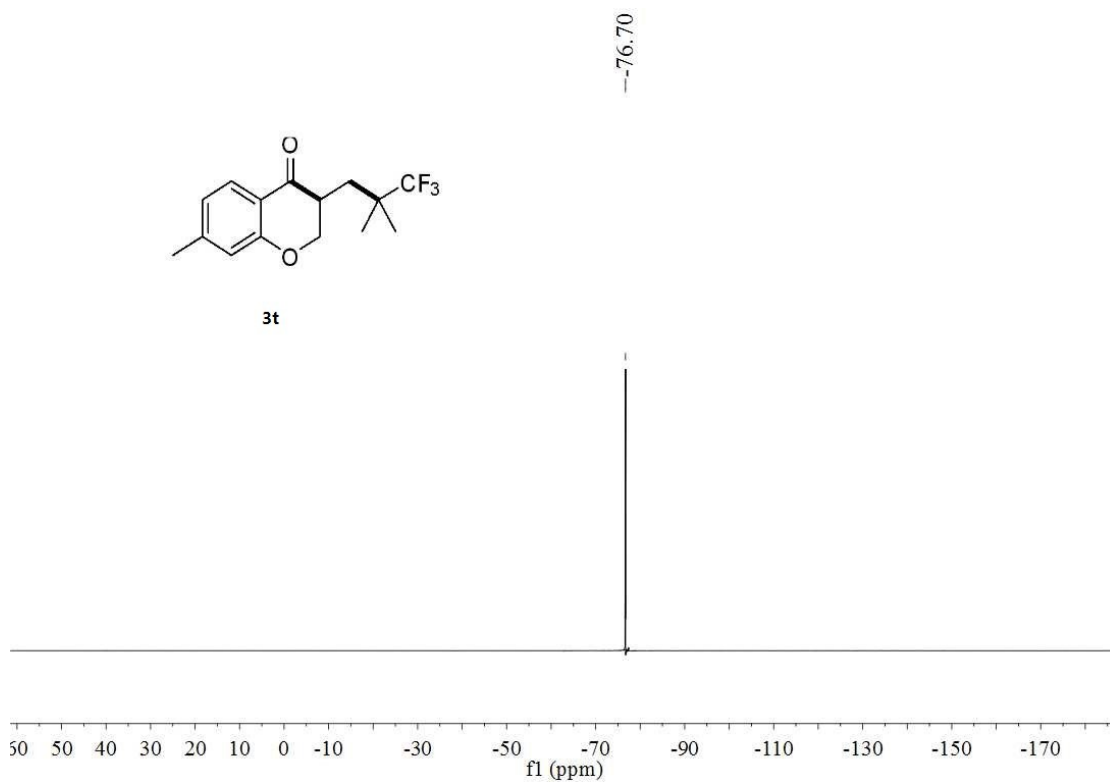

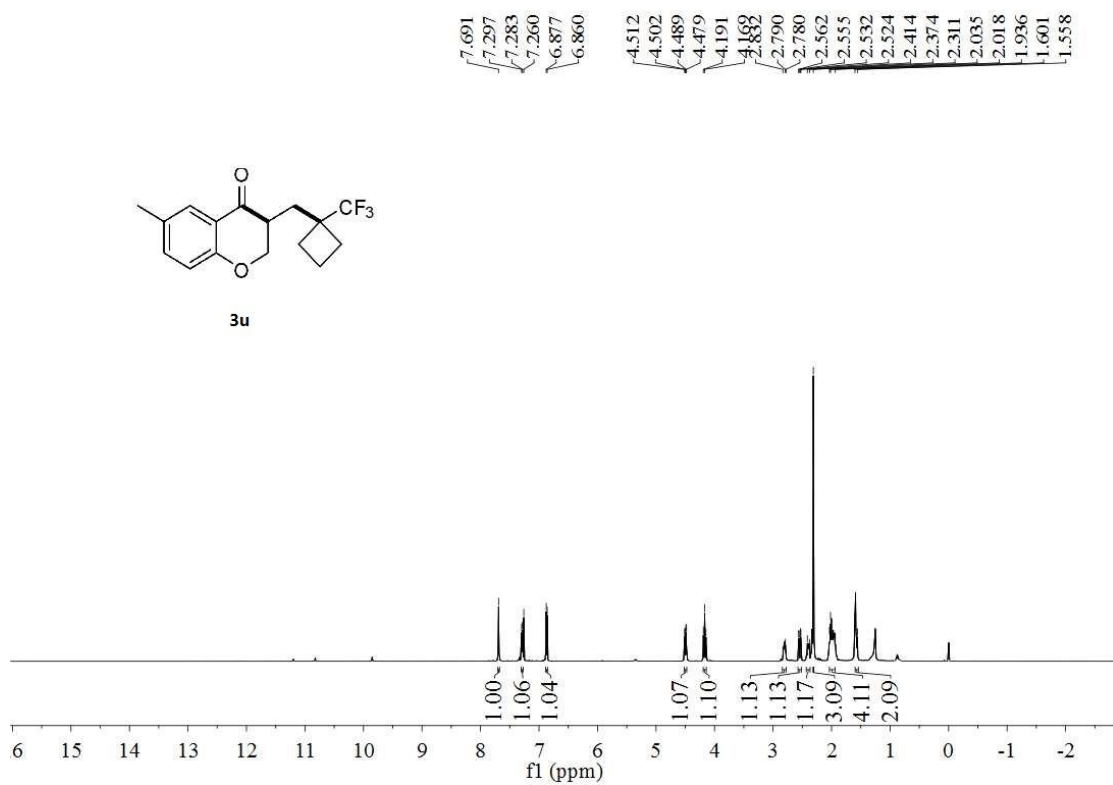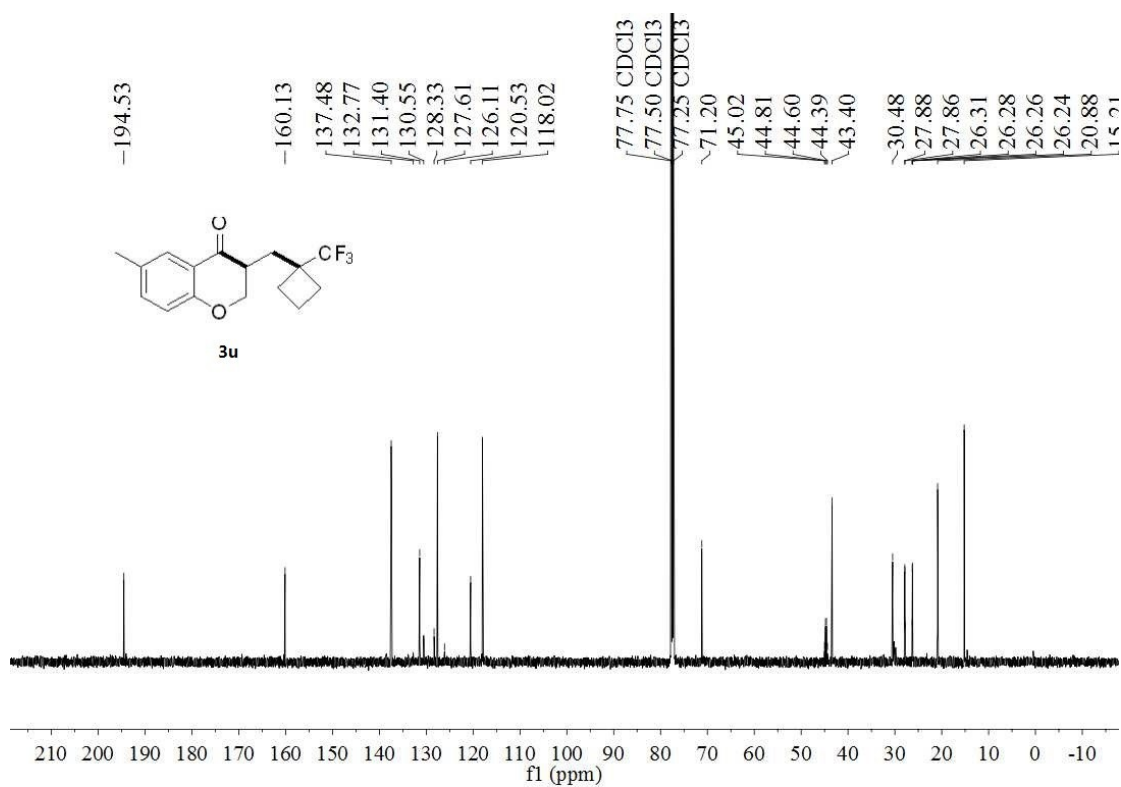

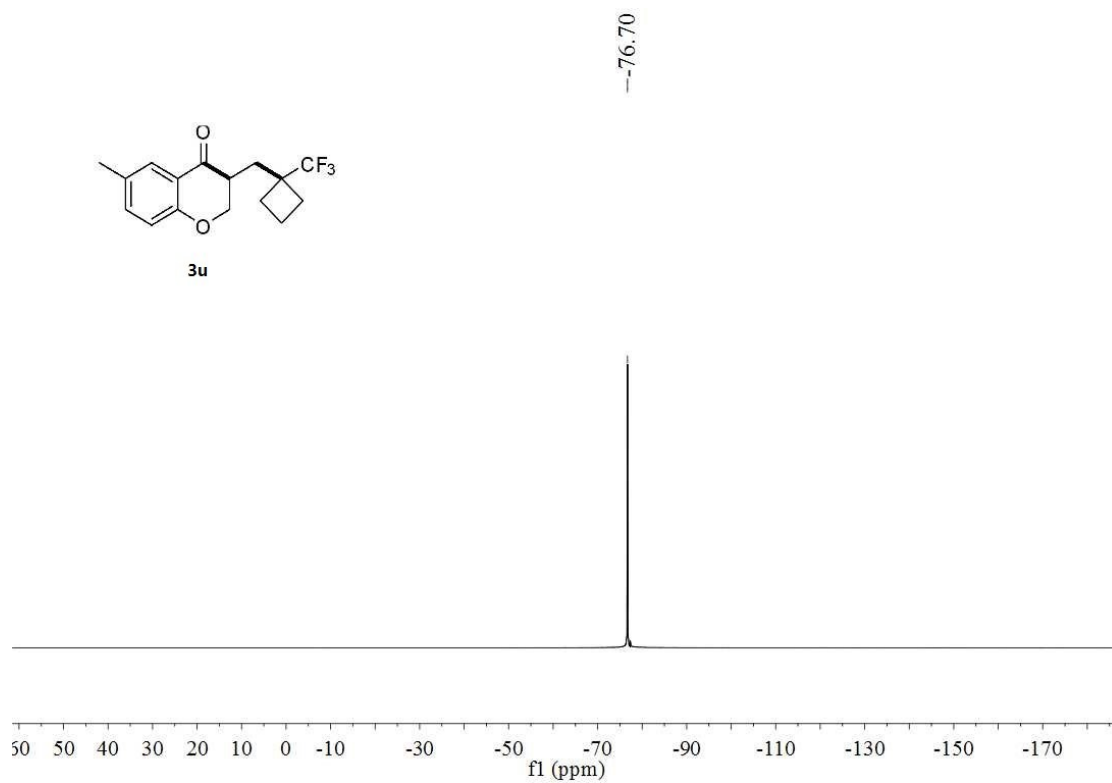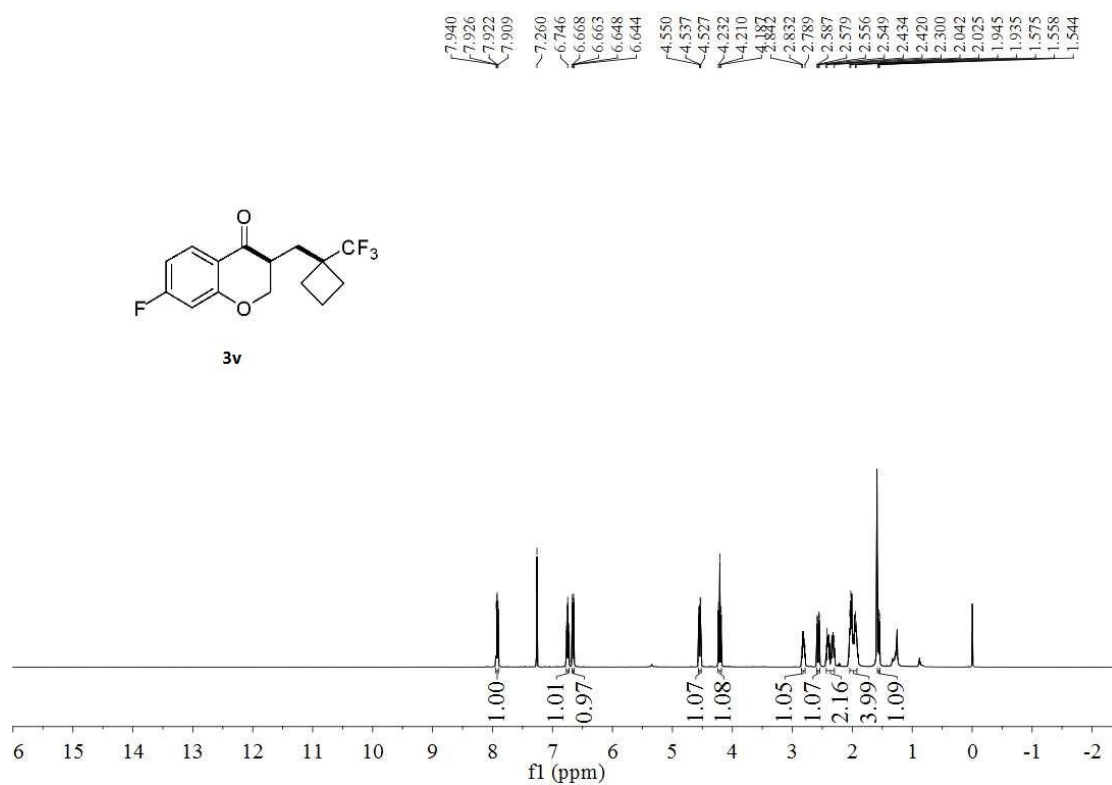

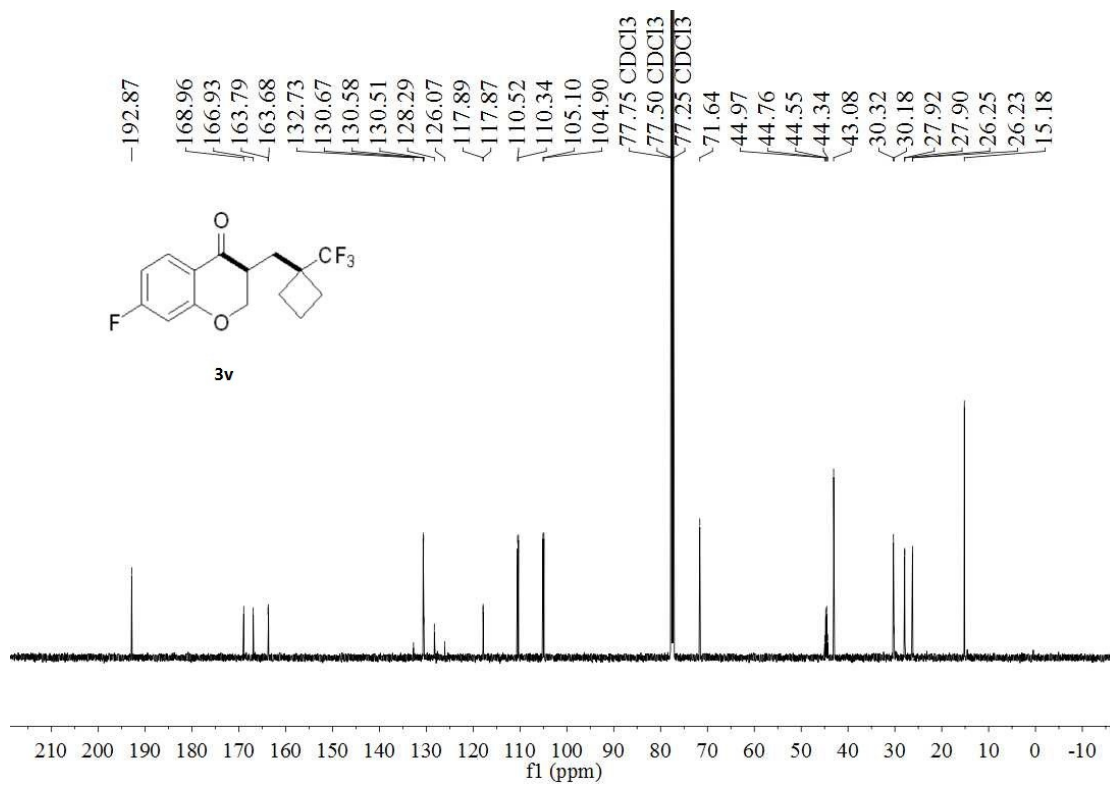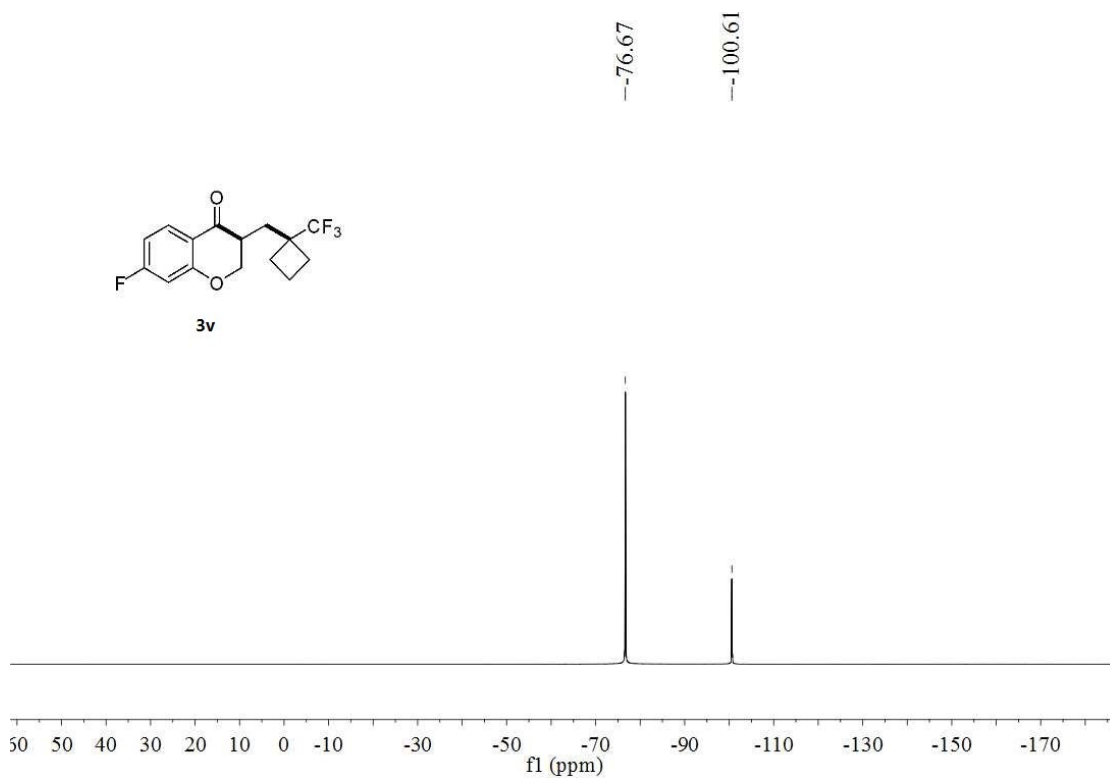

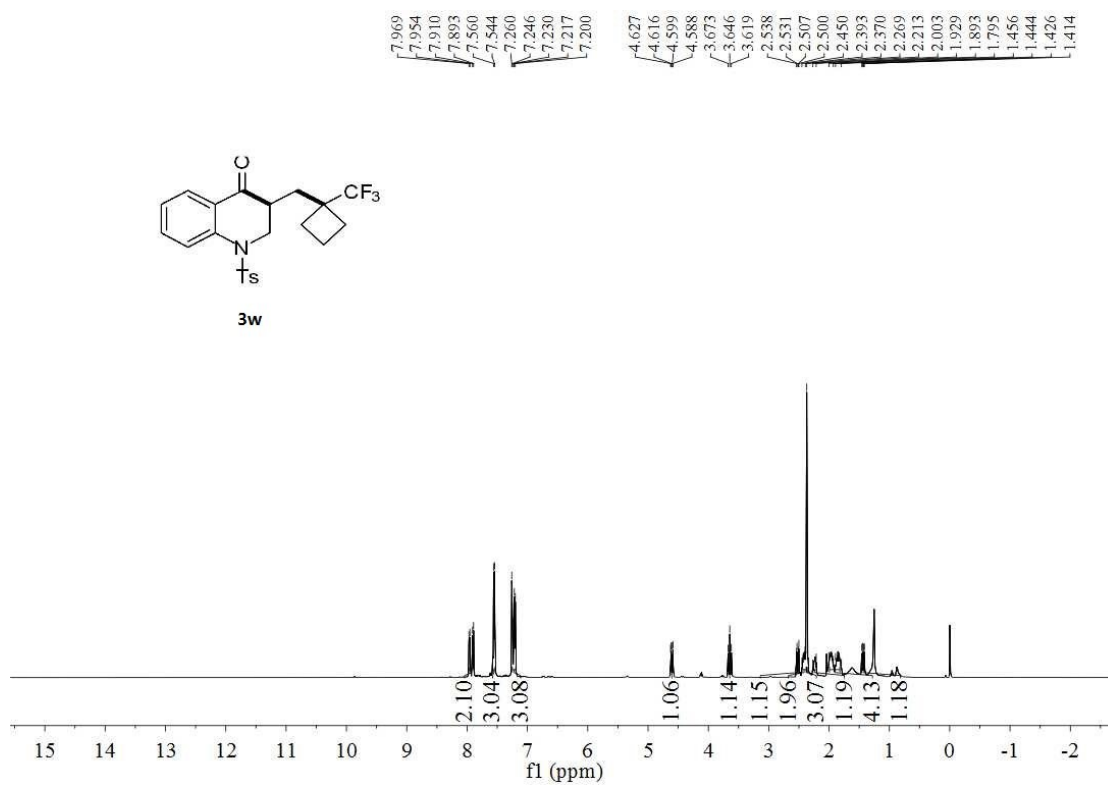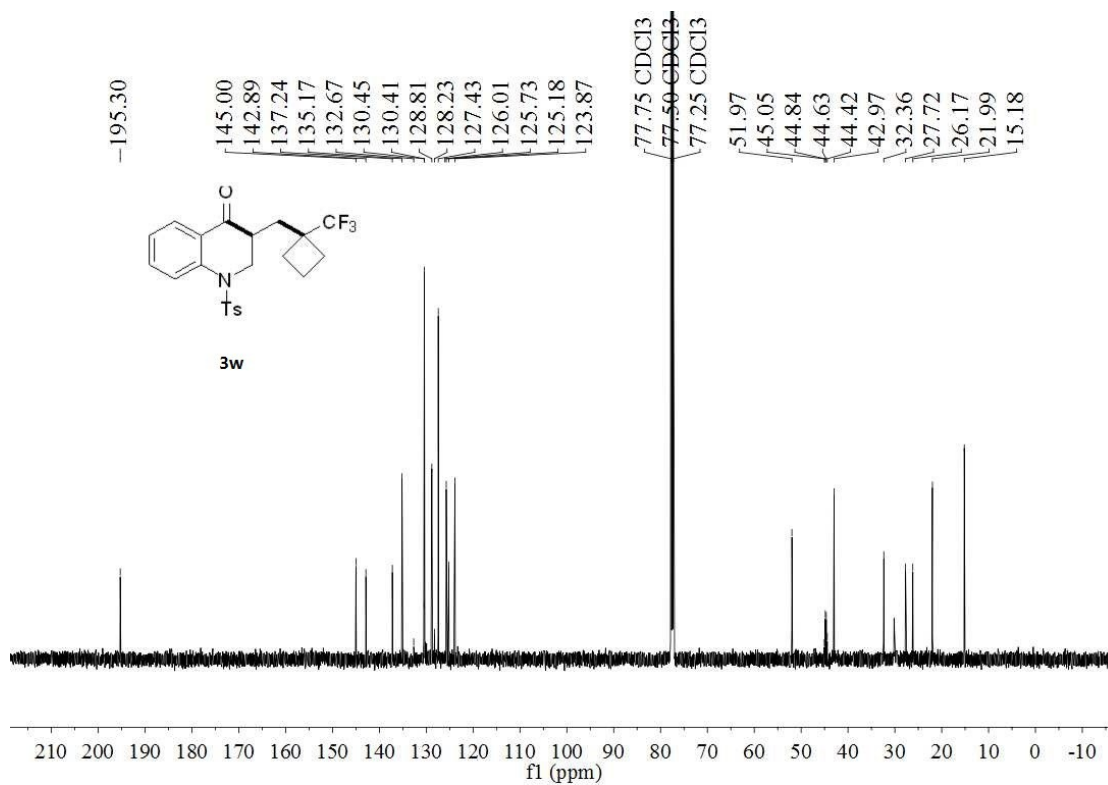

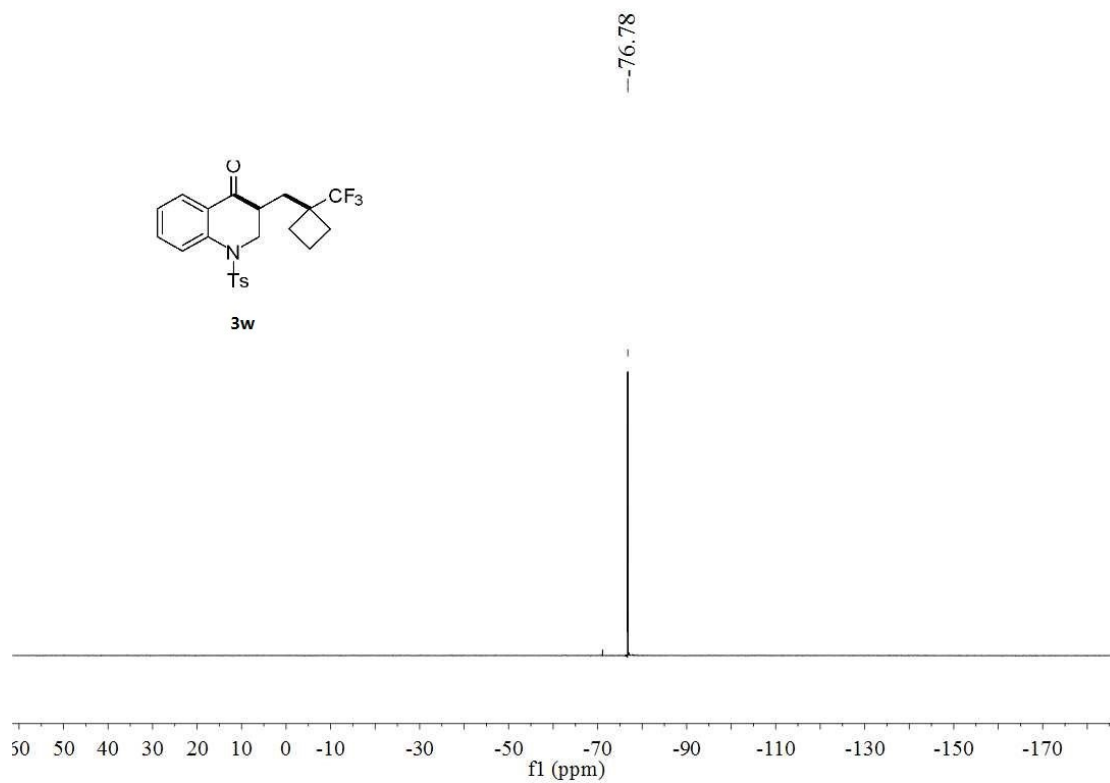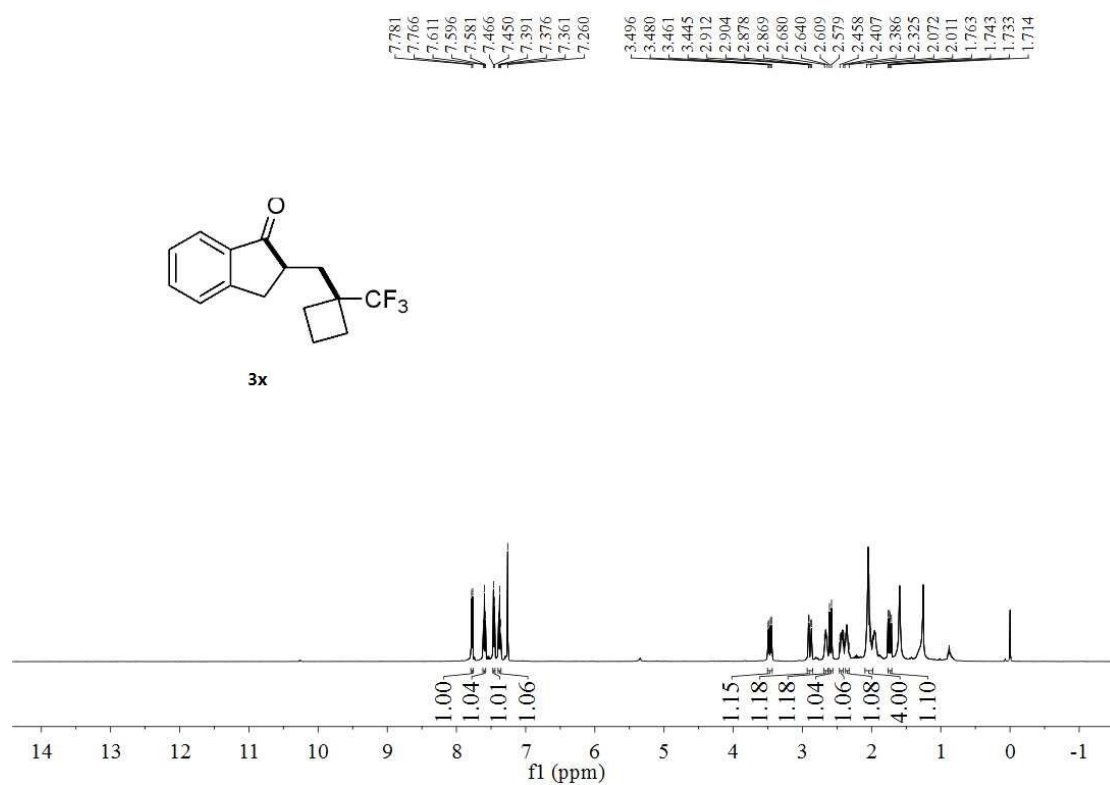

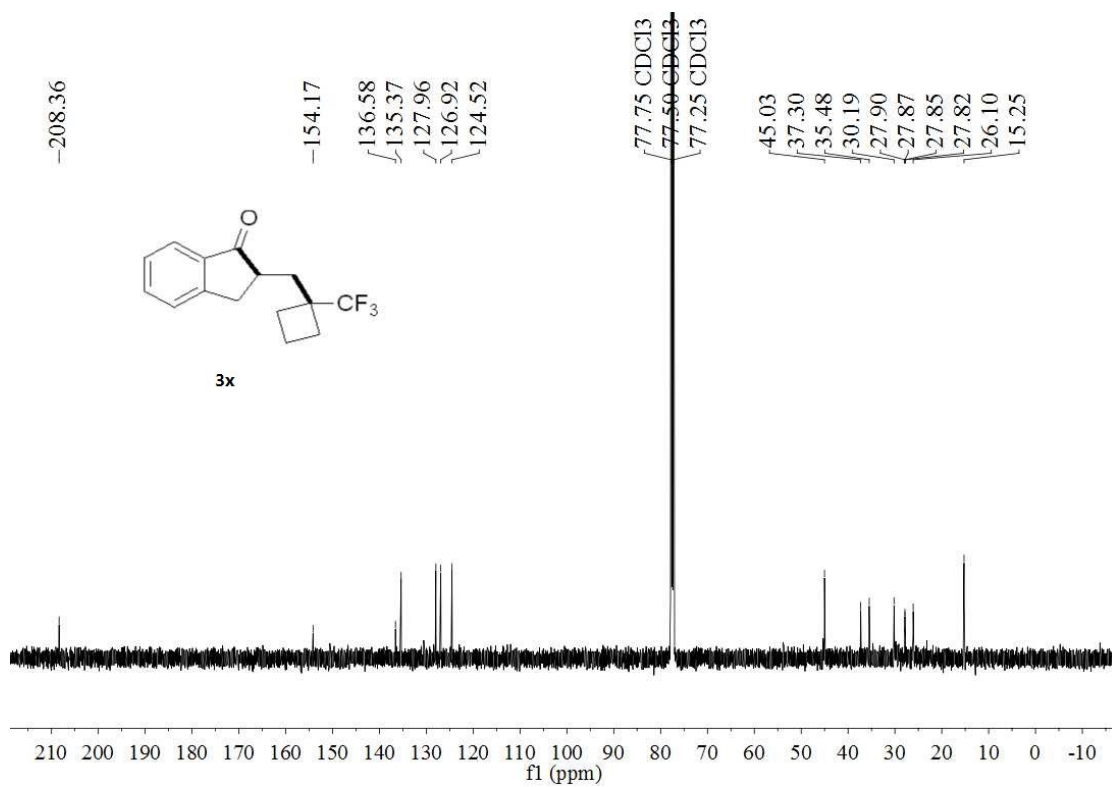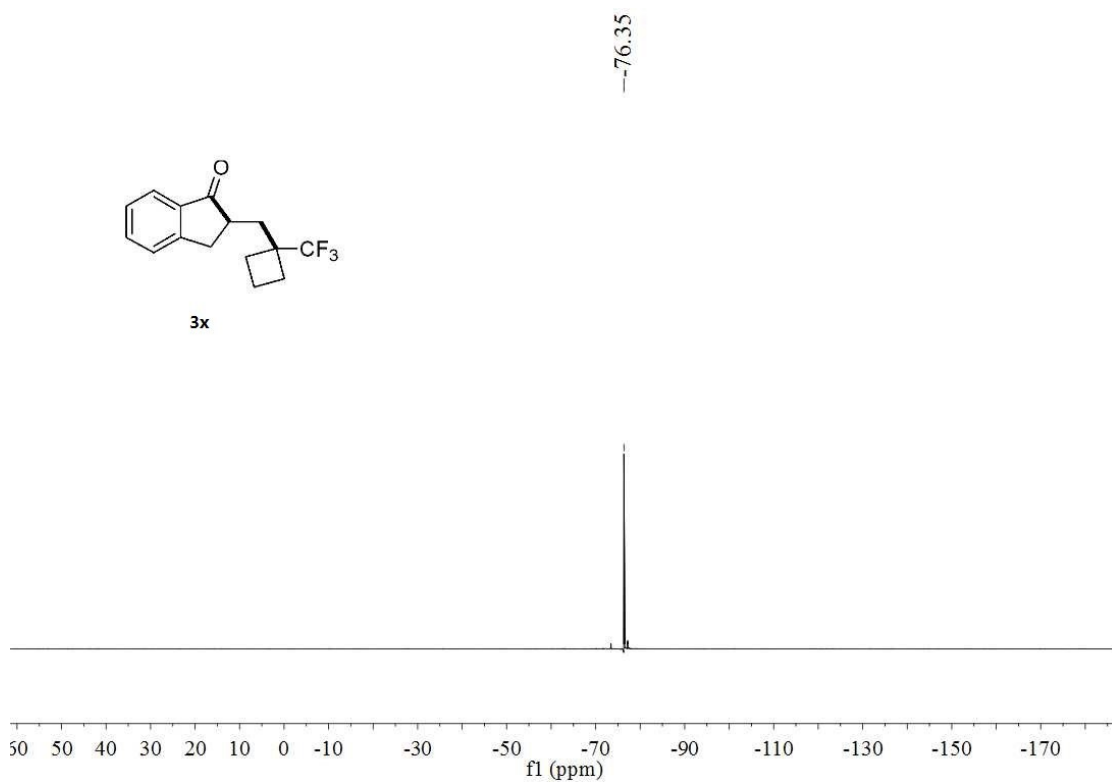

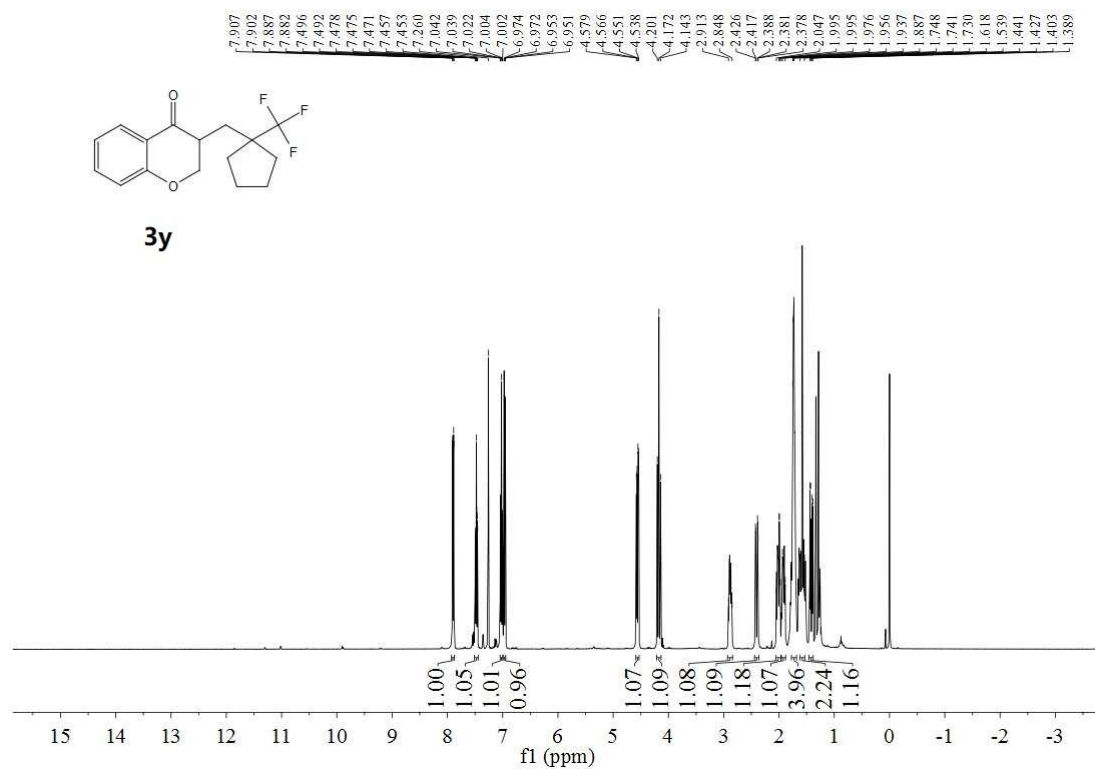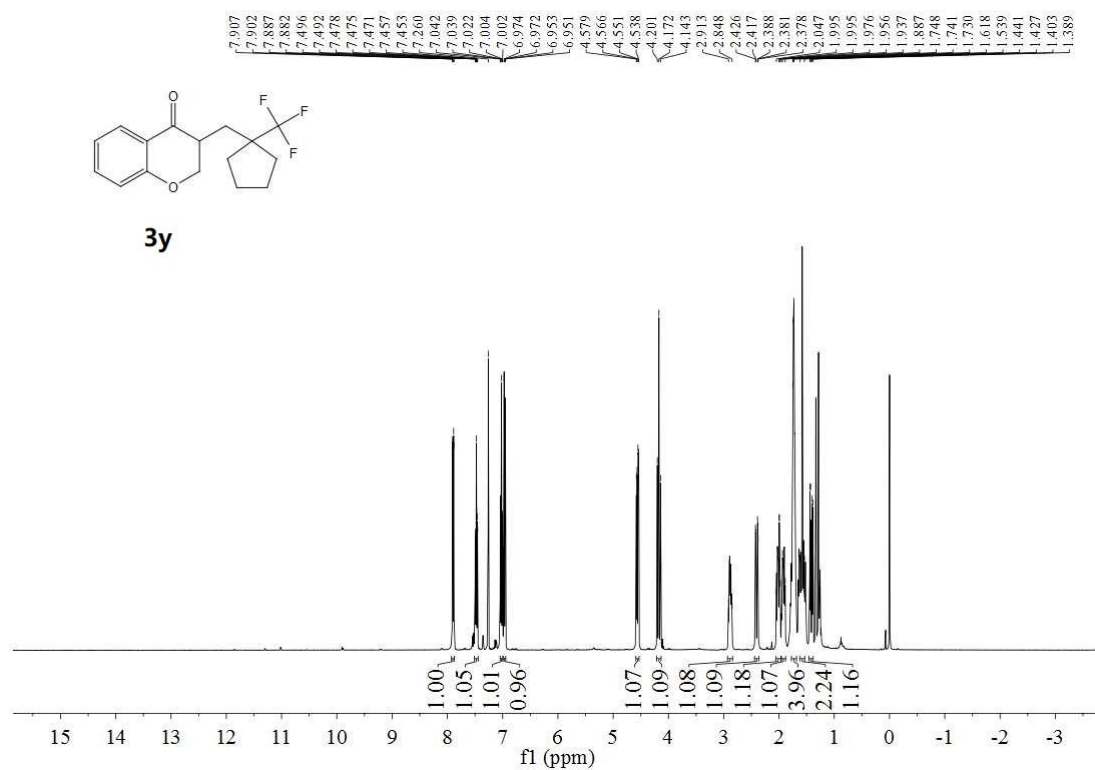

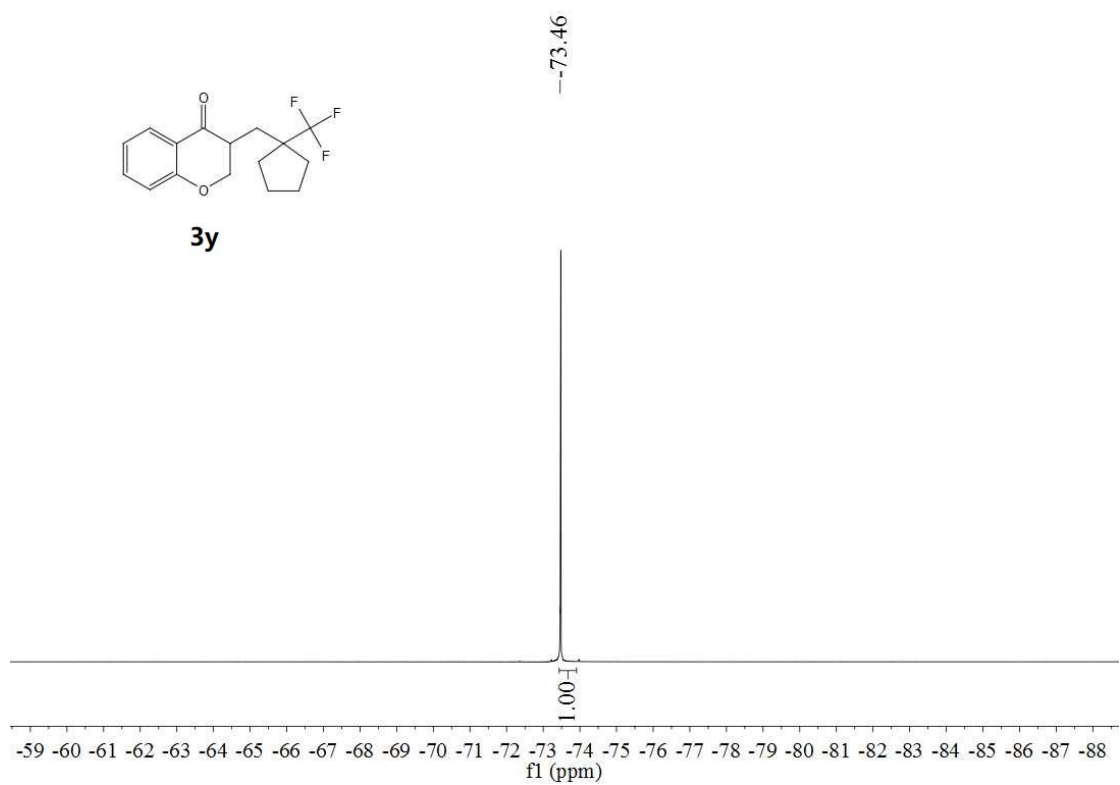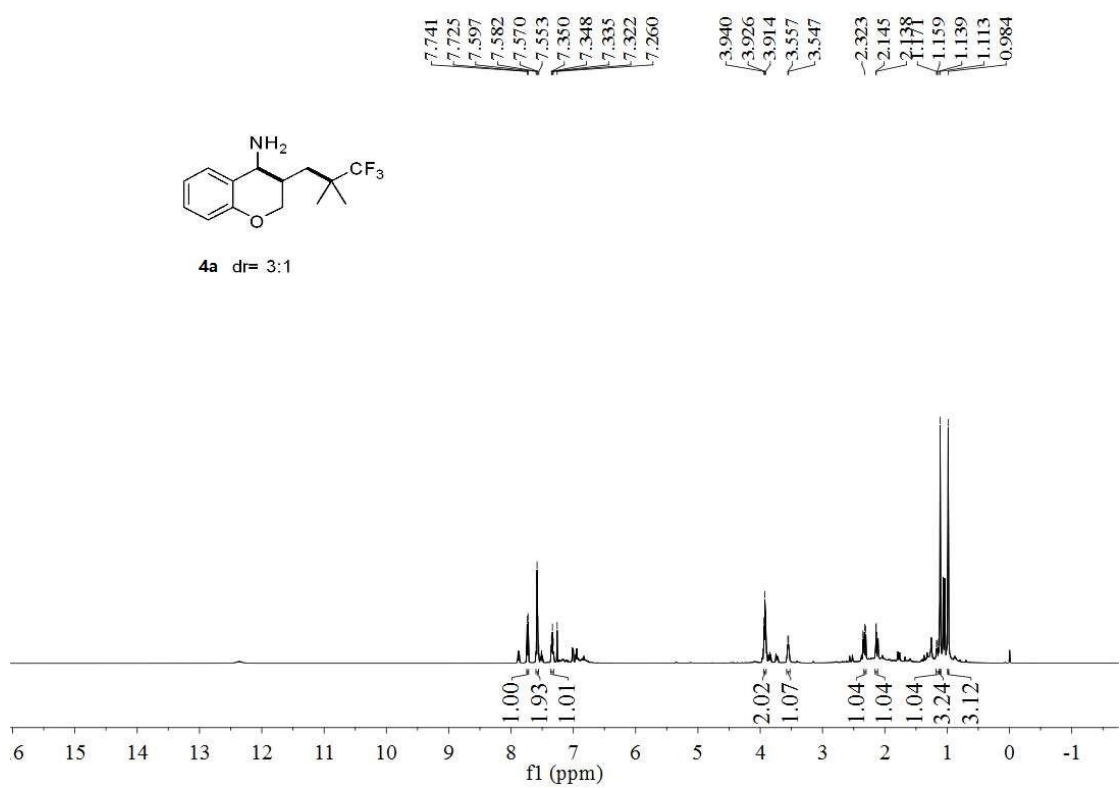

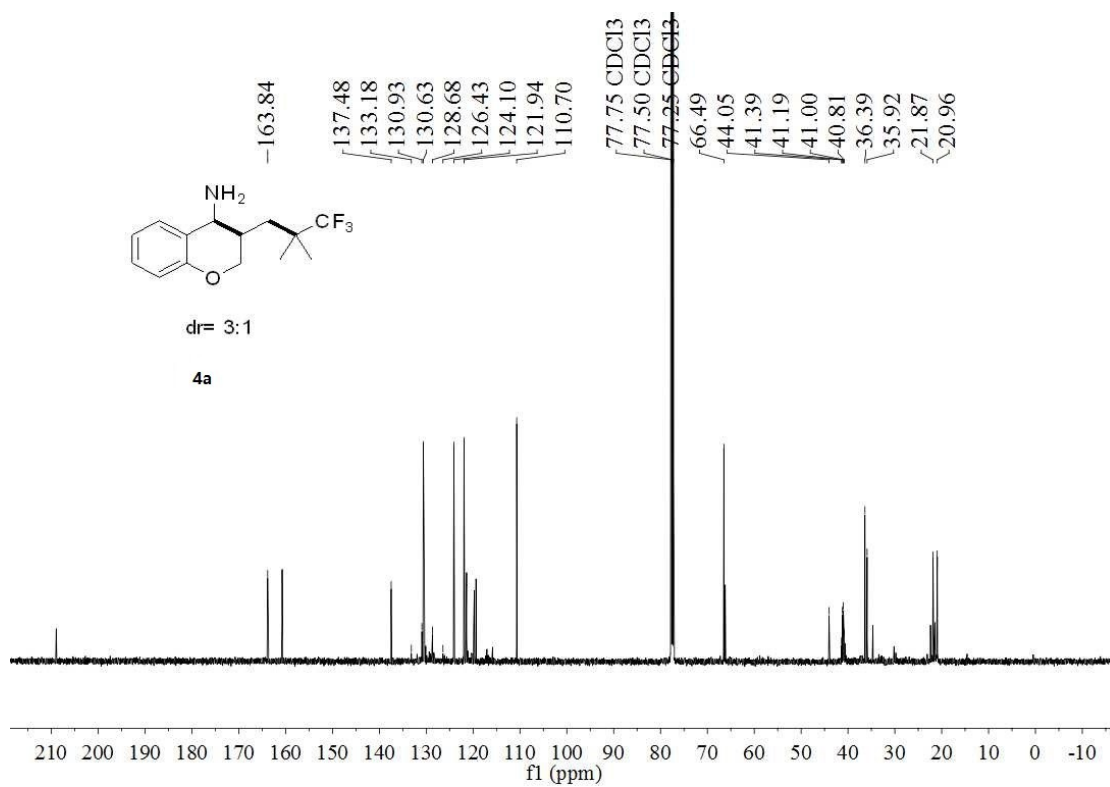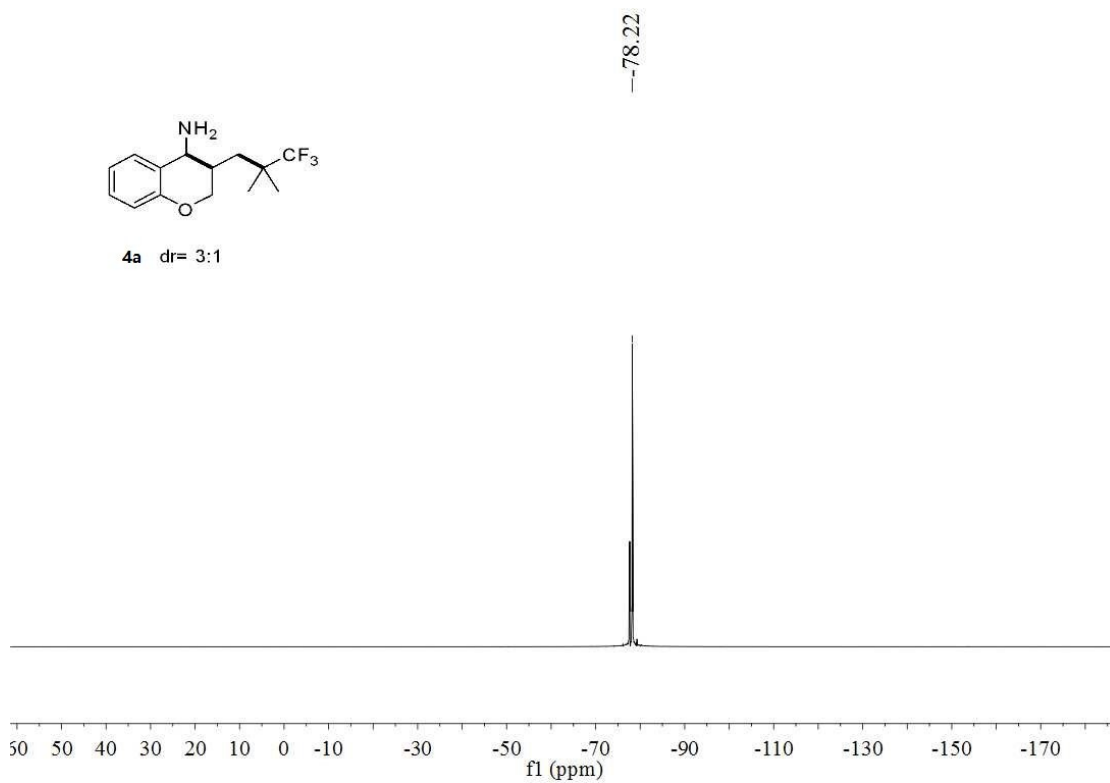

Supplement: c9qo01283d1.pdf [file c9qo01283d1.pdf]
